# Supplementary material for: Evidence for oxygen-conserving diamond formation in redox-buffered subducted oceanic crust sampled as eclogite
Source: Springer Nature journal article supplement (doi:10.1038/s41467-022-29567-z), 2022-04-08
Supplement: MOESM1 [file 41467_2022_29567_MOESM1_ESM.pdf]

# Evidence for oxygen-conserving diamond formation in redox-buffered subducted oceanic crust (eclogite)

Sonja Aulbach<sup>1,\*</sup>, Thomas Stachel<sup>2</sup>

<sup>1</sup> Institut für Geowissenschaften, Goethe-Universität, Frankfurt am Main, Germany

<sup>2</sup> Earth and Atmospheric Sciences, University of Alberta, Edmonton, AB, Canada

\*Corresponding author. *E-mail address:* s.aulbach@em.uni-frankfurt.de

## Supplementary Information

### Supplementary Table 1 Parental melt composition modelling based on Wang et al. (2019)<sup>33</sup>

| $\Delta \log fO_2$                                                         | FMQ-2      | FMQ-1 | FMQ        | FMQ+1 |
|----------------------------------------------------------------------------|------------|-------|------------|-------|
| ~Warm Archaean MORB: $F = 0.2$ and $T_p = 1450$ °C (1549 °C at $F = 0.2$ ) |            |       |            |       |
| Peridotite-melt Bulk $D(V)$                                                | 0.23       | 0.14  | 0.09       | 0.05  |
| V in aggregated melt (ppm)                                                 | <b>174</b> | 239   | 301        | 345   |
| ~Cool Archaean MORB: $F = 0.2$ and $T_p = 1400$ °C (1499 °C at $F = 0.2$ ) |            |       |            |       |
| Peridotite-melt Bulk $D(V)$                                                | 0.26       | 0.16  | 0.10       | 0.06  |
| V in aggregated melt (ppm)                                                 | 154        | 217   | 282        | 333   |
| ~Modern MORB: $F = 0.08$ and $T_p = 1300$ °C (1347 °C at $F = 0.08$ )      |            |       |            |       |
| Peridotite-melt Bulk $D(V)$                                                | 0.73       | 0.44  | 0.27       | 0.16  |
| V in aggregated melt (ppm)                                                 | 81         | 131   | <b>206</b> | 314   |

$fO_2$  oxygen fugacity; FMQ Fayalite-Magnetite-Quartz;  $F$  melt fraction;  $T_p$  mantle potential temperature;  $D$  distribution coefficient

Note: The spreadsheet of Wang et al. (2019)<sup>33</sup> calculates V distribution coefficients for spinel peridotite as a function of temperature and  $fO_2$  (and of mineral compositions which were adopted from the spreadsheet) and melt compositions at 1 GPa, whereby temperature increases with increasing  $F$ ; temperature for the first melt increment is taken to be  $T_p + 0.4 \cdot 30$ , using the adiabat of Katsura et al. (2010)<sup>34</sup> and assuming 30 km = 1 GPa where the melt last equilibrates with its source; V abundances are for aggregated fractional melts

V concentrations in the melt for suggested Archaean and modern conditions are highlighted in bold

16 **Supplementary Table 2** Cumulate composition modelling for sequential mineral  
 17 crystallisation  
 18

| Sample                                                                                               | $D(V)$ min-melt | Wt. fraction | Min V ppm | Bulk V ppm |
|------------------------------------------------------------------------------------------------------|-----------------|--------------|-----------|------------|
| ~Warm Archaean MORB with parental V concentration = 170 ppm at $T_{xx}$ = 1340 °C and $fO_2$ = FMQ-2 |                 |              |           |            |
| Spinel                                                                                               | 6.94            | 0.01         | 1180      | 13         |
| Olivine                                                                                              | 0.15            | 0.20         | 26        | 5          |
| Plagioclase                                                                                          | 0.06            | 0.28         | 10        | 3          |
| Bulk sp-ol-pl cumulate                                                                               | 0.12            | 0.49         |           | <b>21</b>  |
| Clinopyroxene                                                                                        | 2.9             | 0.16         | 493       | 79         |
| BULK+cpx                                                                                             |                 |              |           | 100        |
| BULK+primitive melt                                                                                  |                 | 0.47         |           | 100        |
| ~Warm Archaean MORB with parental V concentration = 300 ppm at $T_{xx}$ = 1340 °C and $fO_2$ = FMQ   |                 |              |           |            |
| Spinel                                                                                               | 2.95            | 0.01         | 885       | 10         |
| Olivine                                                                                              | 0.05            | 0.20         | 15        | 3          |
| Plagioclase                                                                                          | 0.02            | 0.28         | 6         | 2          |
| Bulk sp-ol-pl cumulate                                                                               | 0.05            |              |           | <b>14</b>  |
| Clinopyroxene                                                                                        | 0.85            | 0.34         | 255       | 85         |
| BULK+cpx                                                                                             |                 |              |           | 100        |
| BULK+primitive melt                                                                                  |                 | 0.29         | 300       | 100        |
| ~Cool Archaean MORB with parental V concentration = 154 ppm at $T_{xx}$ = 1290 °C and $fO_2$ = FMQ-2 |                 |              |           |            |
| Spinel                                                                                               | 7.76            | 0.01         | 1194      | 13         |
| Olivine                                                                                              | 0.16            | 0.20         | 25        | 5          |
| Plagioclase                                                                                          | 0.07            | 0.28         | 10        | 3          |
| Bulk sp-ol-pl cumulate                                                                               | 0.14            |              |           | <b>21</b>  |
| Clinopyroxene                                                                                        | 3.77            | 0.14         | 581       | 79         |
| BULK+cpx                                                                                             |                 |              |           | 100        |
| BULK+primitive melt                                                                                  |                 | 0.52         | 154       | 100        |
| ~Cool Archaean MORB with parental V concentration = 154 ppm at $T_{xx}$ = 1290 °C and $fO_2$ = FMQ   |                 |              |           |            |
| Spinel                                                                                               | 3.29            | 0.01         | 507       | 6          |
| Olivine                                                                                              | 0.05            | 0.20         | 8         | 2          |
| Plagioclase                                                                                          | 0.02            | 0.28         | 3         | 1          |
| Bulk sp-ol-pl cumulate                                                                               | 0.05            |              |           | <b>8</b>   |
| Clinopyroxene                                                                                        | 0.71            | 0.84         | 109       | 92         |
| BULK+cpx                                                                                             |                 |              |           | 100        |
| BULK+primitive melt                                                                                  |                 | 0.33         | 154       | 100        |

$fO_2$  oxygen fugacity; FMQ Fayalite-Magnetite-Quartz buffer;  $F$  melt fraction;  $T_{xx}$  crystallisation temperature converted from  $T_p$  mantle potential temperature using the relationship given in Herzberg and Asimow (2008)<sup>35</sup>;  $D$  distribution coefficient; min. mineral; wt. weight; sp spinel, ol olivine, pl plagioclase, cpx clinopyroxene  
 Parental melt V concentrations for modelled conditions and initial melt fraction of 0.2 taken from [Supplementary Table 1](#); V concentrations in bulk cumulates of spinel+olivine+plagioclase shown in bold font; weight fraction of clinopyroxene and primitive melt were adjusted such that the resultant mixture with bulk cumulate yields 100 ppm, corresponding to the low end of abundances in gabbroic eclogites ([Fig. 3](#))

Note: Mineral-melt distribution coefficients for spinel peridotite as a function of temperature and  $fO_2$  are from the spreadsheet of Wang et al. (2019)<sup>33</sup>, which also considers mineral compositions (adopted from the spreadsheet); V abundances are for sequential crystallisation of spinel, olivine, plagioclase and clinopyroxene at weight fractions that were modelled for fractional crystallisation of picrite at 0.05 GPa by Aulbach and Jacob (2016, ref. <sup>36</sup>; their Appendix 5), ignoring, for simplicity, small differences in phase relations arising from differences in  $fO_2$  (example in ref. <sup>36</sup>), and decreasing temperatures with progressive crystallisation

19 **Supplementary Table 3** Melt composition modelling for fractional crystallisation

|                    |  | Temperature- $fO_2$ conditions |                 |                        |         |         |     |     |
|--------------------|--|--------------------------------|-----------------|------------------------|---------|---------|-----|-----|
| $T_p$              |  | 1450 °C                        | 1450 °C         | 1450 °C                | 1500 °C | 1400 °C |     |     |
| Parent melt V      |  | 170                            | 240             | 300                    | 190     | 100     |     |     |
| $T_{xx}$           |  | 1340 °C                        | 1340 °C         | 1340 °C                | 1380 °C | 1290 °C |     |     |
| $\Delta \log fO_2$ |  | FMQ-2                          | FMQ-1           | FMQ                    | FMQ-2   | FMQ-2   |     |     |
|                    |  | $D(V)$ mineral-melt            |                 |                        |         |         |     |     |
| Spinel             |  | 6.94                           | 4.52            | 2.95                   | 6.37    | 0.76    |     |     |
| Olivine            |  | 0.15                           | 0.07            | 0.05                   | 0.14    | 0.16    |     |     |
| Plagioclase        |  | 0.06                           | 0.03            | 0.02                   | 0.06    | 0.06    |     |     |
|                    |  | Melt $F$                       | Melt MgO (wt.%) | Remaining melt V (ppm) |         |         |     |     |
| Onset ol XX        |  | 0.99                           | 16.8            | 159                    | 231     | 294     | 179 | 100 |
| Onset pl XX        |  | 0.79                           | 9.8             | 194                    | 286     | 366     | 218 | 122 |
| Onset cpx XX       |  | 0.51                           | 8.4             | 363                    | 548     | 704     | 410 | 228 |

$fO_2$  oxygen fugacity; FMQ Fayalite-Magnetite-Quartz buffer;  $F$  melt weight fraction remaining;  $T_{xx}$  crystallisation temperature converted from  $T_p$  mantle potential temperature using the relationship given in Herzberg and Asimow (2008, ref. <sup>35</sup>);  $D$  distribution coefficient; ol olivine, pl plagioclase, cpx clinopyroxene

Parental melt V concentrations for modelled conditions taken from [Supplementary Table 1](#) and mineral-melt distribution coefficients from [Supplementary Table 2](#) or modelled as described therein and in the [Methods](#)

Note: V abundances are for sequential fractionation of spinel, olivine, plagioclase and clinopyroxene, and for weight fractions of the remaining melt, ignoring, for simplicity, small differences in phase relations arising from differences in  $fO_2$  (example in Aulbach and Jacob, 2016, ref. <sup>36</sup>), and decreasing temperatures with progressive crystallisation; melt weight fractions as well as melt MgO content from ref. <sup>36</sup> (their Appendix 5) which were modelled for fractional crystallisation of picrite at 0.05 GPa

**Supplementary Table 4** Eclogite composition modelling for high-pressure batch melt extraction

| Element ppm ( $\Delta \log fO_2$ ) | IW  | V (FMQ-4) | V (FMQ-2) | V (FMQ-1) | V (FMQ) | Ce/Yb <sub>NMORB</sub> |
|------------------------------------|-----|-----------|-----------|-----------|---------|------------------------|
| $C_0$                              |     | 170       | 170       | 170       | 170     |                        |
| $D$ rutile-melt                    |     | 4.96      | 3.89      | 3.36      | 2.82    |                        |
| $D$ cpx-melt                       | 5.4 | 6.49      | 2.14      | 1.14      | 0.57    |                        |
| $D$ garnet-melt                    | 4.2 | 6.49      | 2.14      | 1.14      | 0.57    |                        |
| Bulk $D$ eclogite-melt             |     | 6.48      | 2.15      | 1.15      | 0.58    |                        |

|                 | Concentration (ppm) and ratio in residue from batch melting |     |     |     |      |
|-----------------|-------------------------------------------------------------|-----|-----|-----|------|
| Melt $F = 0.05$ | 177                                                         | 174 | 171 | 164 | 0.65 |
| Melt $F = 0.1$  | 185                                                         | 179 | 172 | 158 | 0.47 |
| Melt $F = 0.2$  | 204                                                         | 190 | 174 | 149 | 0.29 |
| Melt $F = 0.3$  | 227                                                         | 202 | 176 | 140 | 0.19 |

$fO_2$  oxygen fugacity; IW Iron-Wuestite buffer, FMQ Fayalite-Magnetite-Quartz buffer;  $F$  melt fraction;  $D$  distribution coefficient; cpx clinopyroxene

$C_0$  for V is chosen as an example, for Ce and Yb it corresponds to concentrations in NMORB of Gale et al. (2013, ref. <sup>31</sup>);  $D(V)$  rutile-melt and  $D(V)$  cpx-melt as a function of  $fO_2$  were parameterised from results reported in Holycross and Cottrell (2020, ref. <sup>37</sup>) and Mallmann and O'Neill (2009), respectively;  $D(V)$  garnet-melt was assumed to be identical to that of cpx based on results reported in Mallmann and O'Neill (2009, ref. <sup>38</sup>); cpx-melt  $D(Ce)$  and  $D(Yb)$  from Barth et al. (2002, ref. <sup>39</sup>); bulk  $D$  was calculated for 0.005 rutile, 0.445 cpx and 0.55 garnet following Aulbach and Jacob (2016, ref. <sup>36</sup>); Ce/Yb<sub>NMORB</sub> is the NMORB-normalised ratio

Average of mineral-melt  $D(V)$  for experiments carried out near the iron-wuestite (IW) oxygen buffer are from Barth et al. (2002, ref. <sup>39</sup>)

21

22

23

**Supplementary Table 5** Metasomatic clinopyroxene modelling

| Metasomatic melt V (ppm) | Temperature- $fO_2$ conditions         |         |         |         |         |         |
|--------------------------|----------------------------------------|---------|---------|---------|---------|---------|
|                          | 100                                    | 150     | 100     | 150     | 100     | 150     |
| $T_{xx}$                 | 1100 °C                                | 1100 °C | 1200 °C | 1200 °C | 1200 °C | 1200 °C |
| $\Delta \log fO_2$       | FMQ                                    | FMQ     | FMQ     | FMQ     | FMQ+1   | FMQ+1   |
|                          | $D(V)$ clinopyroxene-melt              |         |         |         |         |         |
|                          | 3.53                                   | 3.53    | 1.84    | 1.84    | 1.00    | 1.00    |
|                          | V concentration (ppm) in clinopyroxene |         |         |         |         |         |
|                          | 353                                    | 530     | 184     | 276     | 100     | 150     |

$fO_2$  oxygen fugacity; FMQ Fayalite-Magnetite-Quartz buffer;  $T_{xx}$  crystallisation temperature;  $D$  distribution coefficient; cpx clinopyroxene

Metasomatic clinopyroxene is assumed to crystallise from a kimberlite-like melt with V concentrations of 100-150 ppm, reflecting average concentrations in different kimberlites from the Superior craton as examples (Tappe et al., 2017, ref. <sup>40</sup>); cpx-melt distribution coefficients as a function of temperature and  $fO_2$  derived from Wang et al. (2019, ref. <sup>33</sup>) as described in [Supplementary Table 2](#) and in the [Methods](#)

24

25  
26

**Supplementary Table 6** Ti and V concentrations in synthetic rutile and in three samples determined by EPMA compared to LAM-ICPMS

| Sample            | TiO <sub>2</sub><br>wt.% | Total V<br>ppm | Apparent<br>V<br>ppm <sup>1</sup> | % Total<br>V | Corrected<br>V<br>ppm | LAM-<br>ICPMS V<br>ppm <sup>2</sup> | % Deviation<br>EPMA<br>vs LAM |
|-------------------|--------------------------|----------------|-----------------------------------|--------------|-----------------------|-------------------------------------|-------------------------------|
| Avg dl cpx        | 0.03                     | 152            |                                   |              |                       |                                     |                               |
| Avg dl gt         | 0.03                     | 159            |                                   |              |                       |                                     |                               |
| Synth Rutile (13) | 99.73                    | 2660           | 2660                              |              |                       |                                     |                               |
| 1σ                | 0.45                     | 68             | 68                                |              |                       |                                     |                               |
| OE23 cpx (6)      | 0.49                     | 279            | 13                                | 5            | 266                   | 252                                 | 5                             |
| 1σ                | 0.01                     | 42             | 0                                 | 1            | 42                    |                                     |                               |
| OE16 cpx (2)      | 0.36                     | 445            | 10                                | 2            | 436                   | 455                                 | -4                            |
| 1σ                | 0.01                     | 11             | 0                                 | 0            | 11                    |                                     |                               |
| OE34 cpx (9)      | 0.35                     | 216            | 9                                 | 5            | 207                   | 198                                 | 4                             |
| 1σ                | 0.01                     | 59             | 0                                 | 2            | 59                    |                                     |                               |
| OE23 gt (6)       | 1.01                     | 219            | 27                                | 13           | 192                   | 188                                 | 3                             |
| 1σ                | 0.02                     | 45             | 0                                 | 3            | 45                    |                                     |                               |
| OE16 gt (3)       | 0.19                     | 118            | 5                                 | 9            | 113                   | 101                                 | 12                            |
| 1σ                | 0.01                     | 90             | 0                                 | 11           | 90                    |                                     |                               |

EPMA Electron Probe Micro Analyser, LAM-ICPMS Laser Ablation Microprobe-Inductively-Coupled Plasma Mass Spectrometer; cpx clinopyroxene, gt garnet, dl detection limit, synth synthetic; number in parentheses = spots measured

<sup>1</sup> V concentration arising from the overlap of TiKβ on the VKα peak, as determined by measurement of V<sub>2</sub>O<sub>3</sub> in the pure synthetic rutile standard and amounting to 26.7±0.7 ppm V per wt.% TiO<sub>2</sub>

<sup>2</sup> V concentration reported in Aulbach et al. 2020 (ref. <sup>14</sup>)

27

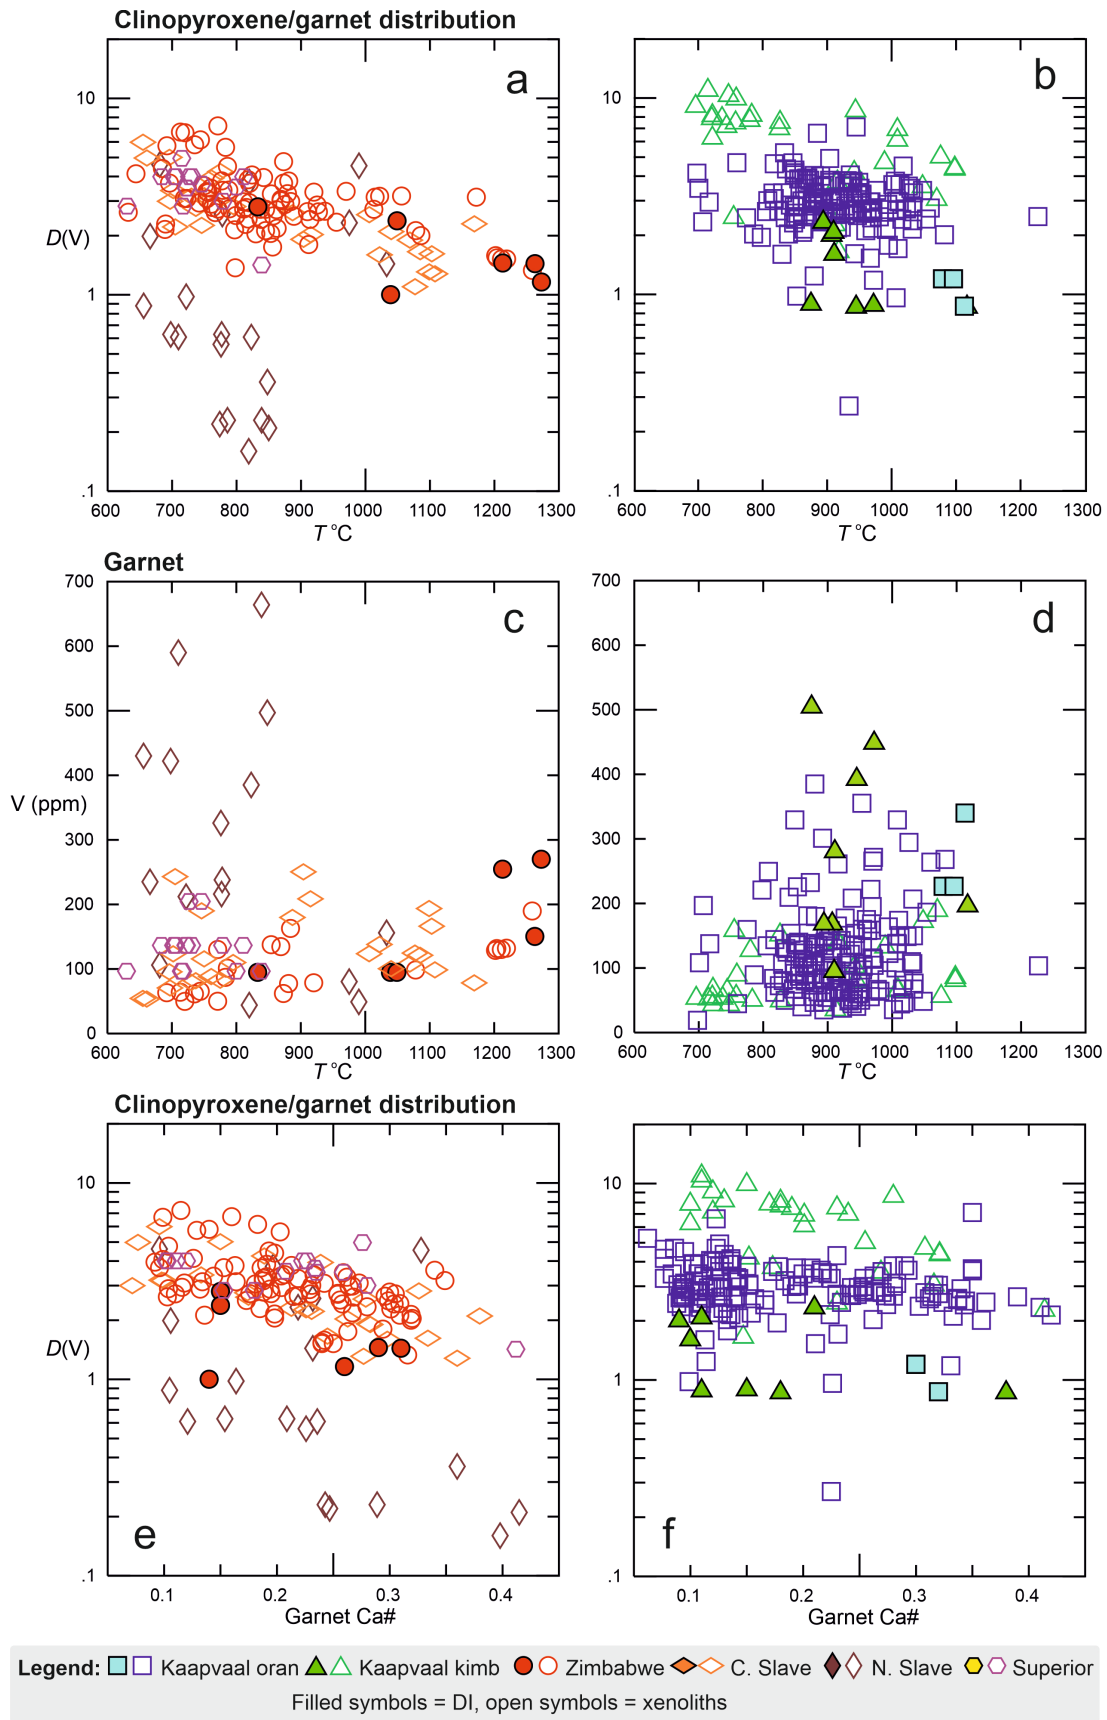

28  
29

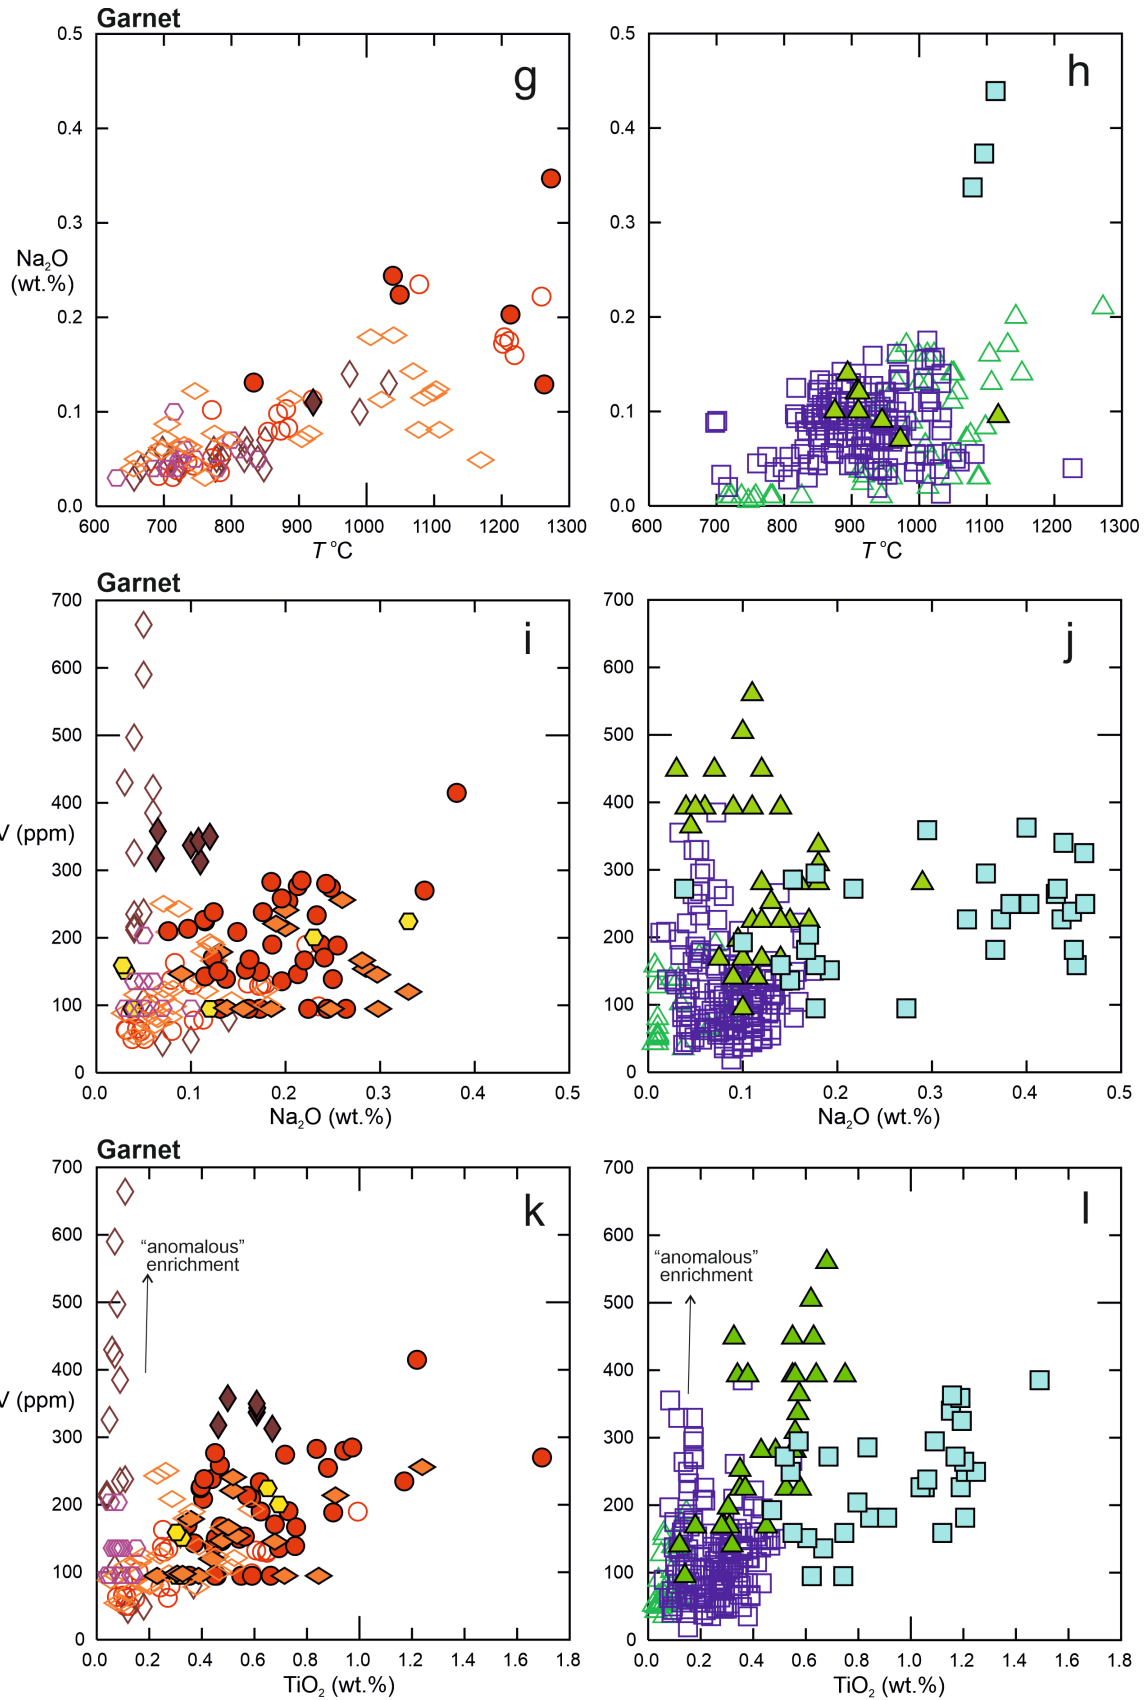

30  
31

32 **Supplementary Fig. 1** Scatter plots illustrating relationships between various variables  
33 suggested to be related to temperature-crystal-chemically-controlled uptake of V and other  
34 minor and trace elements. **a-b** Distribution  $D$  of V between clinopyroxene and garnet in  
35 eclogite xenoliths and DI as a function of temperature ( $^{\circ}\text{C}$ ; thermometer of Krogh, 1988, ref.  
36 <sup>41</sup>, calculated iteratively with regional conductive model geotherms; see [Methods](#)); **c-d** V  
37 contents (ppm) in garnet as a function of temperature ( $^{\circ}\text{C}$ ); **e-f**  $D(\text{V})$  as a function of Ca#  
38 ( $\text{Ca}/(\text{Mg}+\text{Fe}^{\text{total}}+\text{Ca}+\text{Mn})$  molar); **g-h**  $\text{Na}_2\text{O}$  contents (wt.%) in garnet as a function of  
39 temperature ( $^{\circ}\text{C}$ ); **i-j** V abundances in garnet (ppm) as a function of  $\text{Na}_2\text{O}$  contents (wt.%); **k-**  
40 **l** V abundances in garnet (ppm) as a function of  $\text{TiO}_2$  content (wt.%). Several samples from  
41 Kaapvaal and the northern Slave craton show anomalous (relative to the main trend)  
42 enrichment in V; data for different localities are split up into two panels to avoid clutter, those  
43 for the Kaapvaal craton show orangeite-hosted (oran) and kimberlite-hosted (kimb) samples,  
44 reflecting two distinct periods of magmatism, separately. Average  $1\sigma$  uncertainties on V  
45 abundances in garnet from DI are 117 ppm and from xenoliths 5.6 ppm (corresponding to  
46 typical uncertainties for multiple analyses per sample reported in the literature, see [Methods](#)).  
47 Data sources in [Supplementary Data 1](#).



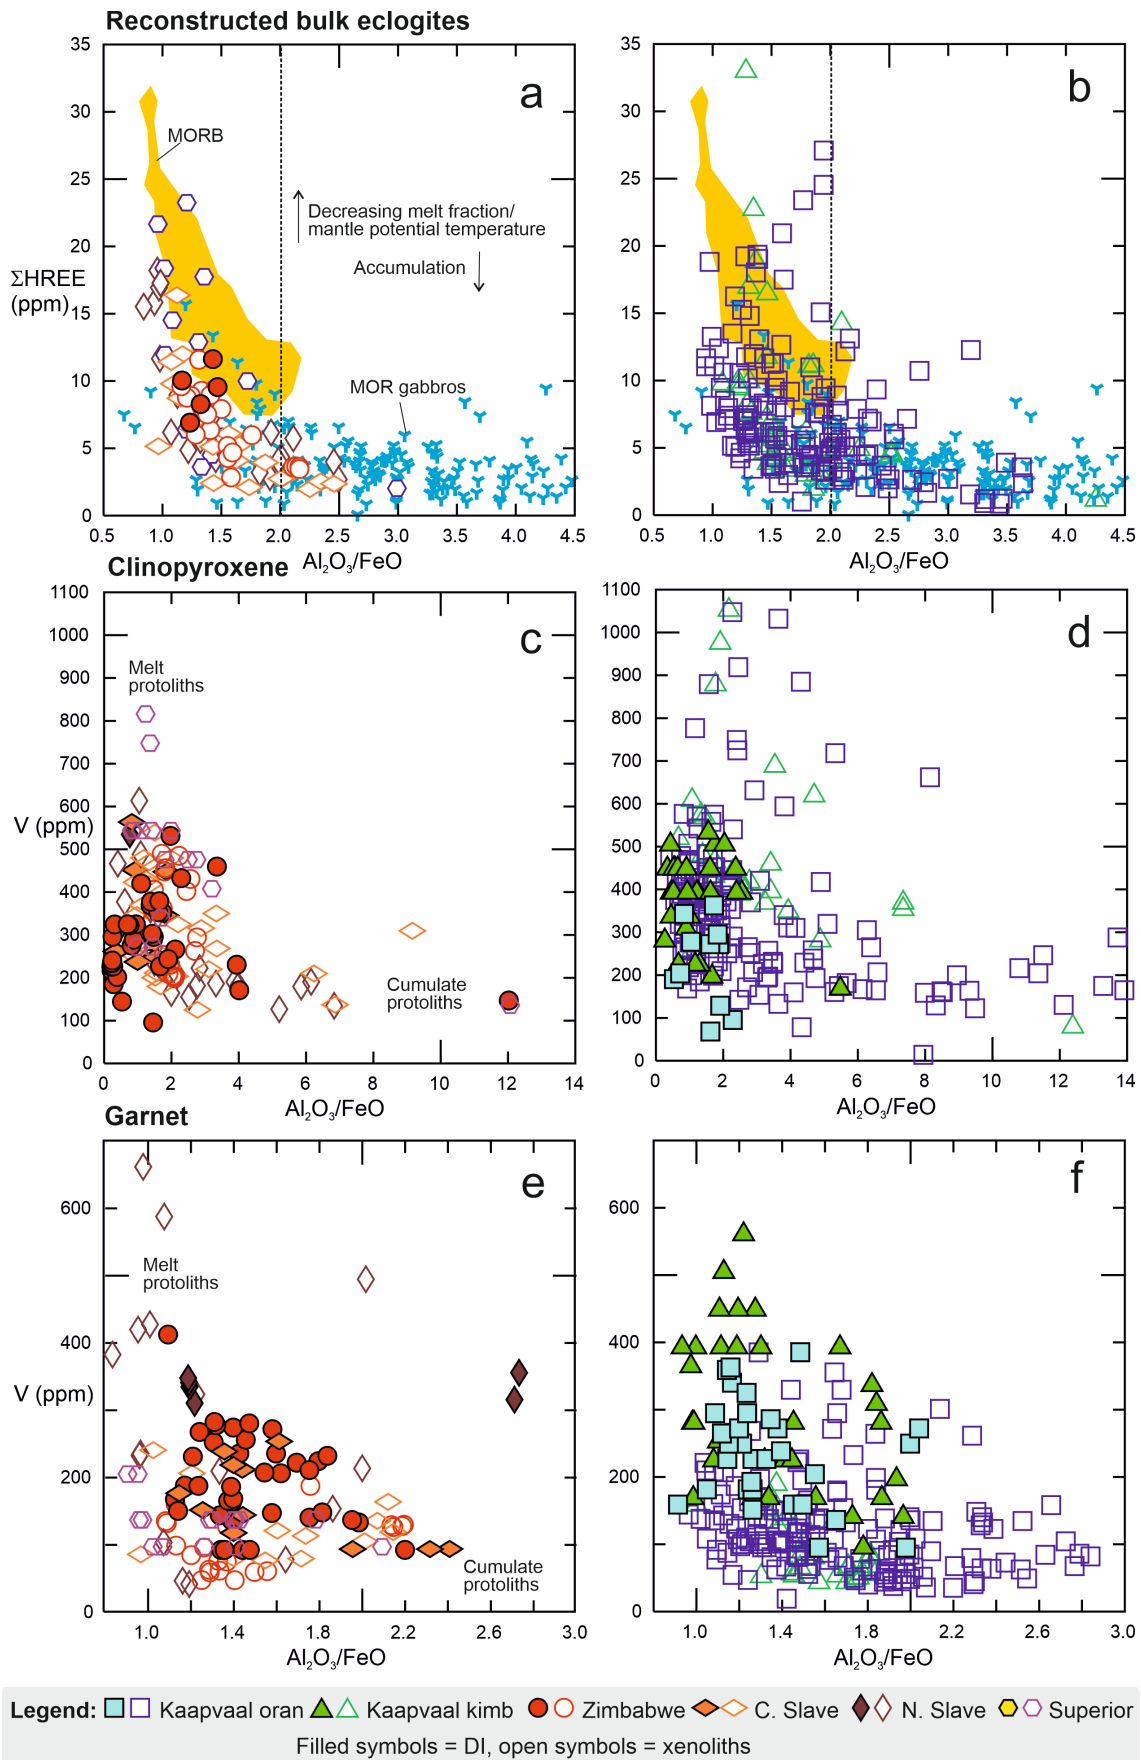

50 **Supplementary Fig. 2** Scatter plots illustrating the effect of accumulation and differentiation,  
51 using  $\text{Al}_2\text{O}_3/\text{FeO}$  as a proxy for plagioclase accumulation during low-pressure protolith  
52 formation, on trace element and V abundances in eclogite. **a-b**  $\Sigma\text{HREE}$  (ppm; summed from  
53 Tb to Lu) in reconstructed eclogite xenoliths and DI. Effect of accumulation, and of  
54 decreasing mantle potential temperatures and lower resulting melt fractions, are indicated  
55 with arrows in **a**, also shown for comparison are mid-ocean ridge basalts (MORB; yellow  
56 field; data from Jenner and O'Neill, 2012, ref. <sup>42</sup>) and MOR gabbros (blue tristar,  
57  $\text{Eu}/\text{Eu}^* > 1.05$ ; from PetDB: [www.earthchem.org/petdb](http://www.earthchem.org/petdb)). Stippled line shows suggested cut-off  
58 between cumulates and melts; there are few diamonds with clinopyroxene-garnet pairs from  
59 which bulk rocks can be reconstructed, and few of those with REE data. Vanadium  
60 abundances (ppm) in **c-d** clinopyroxene and **e-f** garnet. Samples with suggested cumulate vs.  
61 melt protoliths are indicated. Average  $1\sigma$  uncertainties on V abundances in clinopyroxene,  
62 garnet and reconstructed bulk eclogites from DI are 67, 117 and 69 ppm, respectively, from  
63 xenoliths they are 14.5, 5.6 and 29 ppm, respectively (corresponding to typical uncertainties  
64 for multiple analyses per mineral and sample reported in the literature, and to propagated  
65 uncertainties for reconstructed bulk eclogites, see [Methods](#)). Data sources in [Supplementary](#)  
66 [Data 1](#).

67  
68

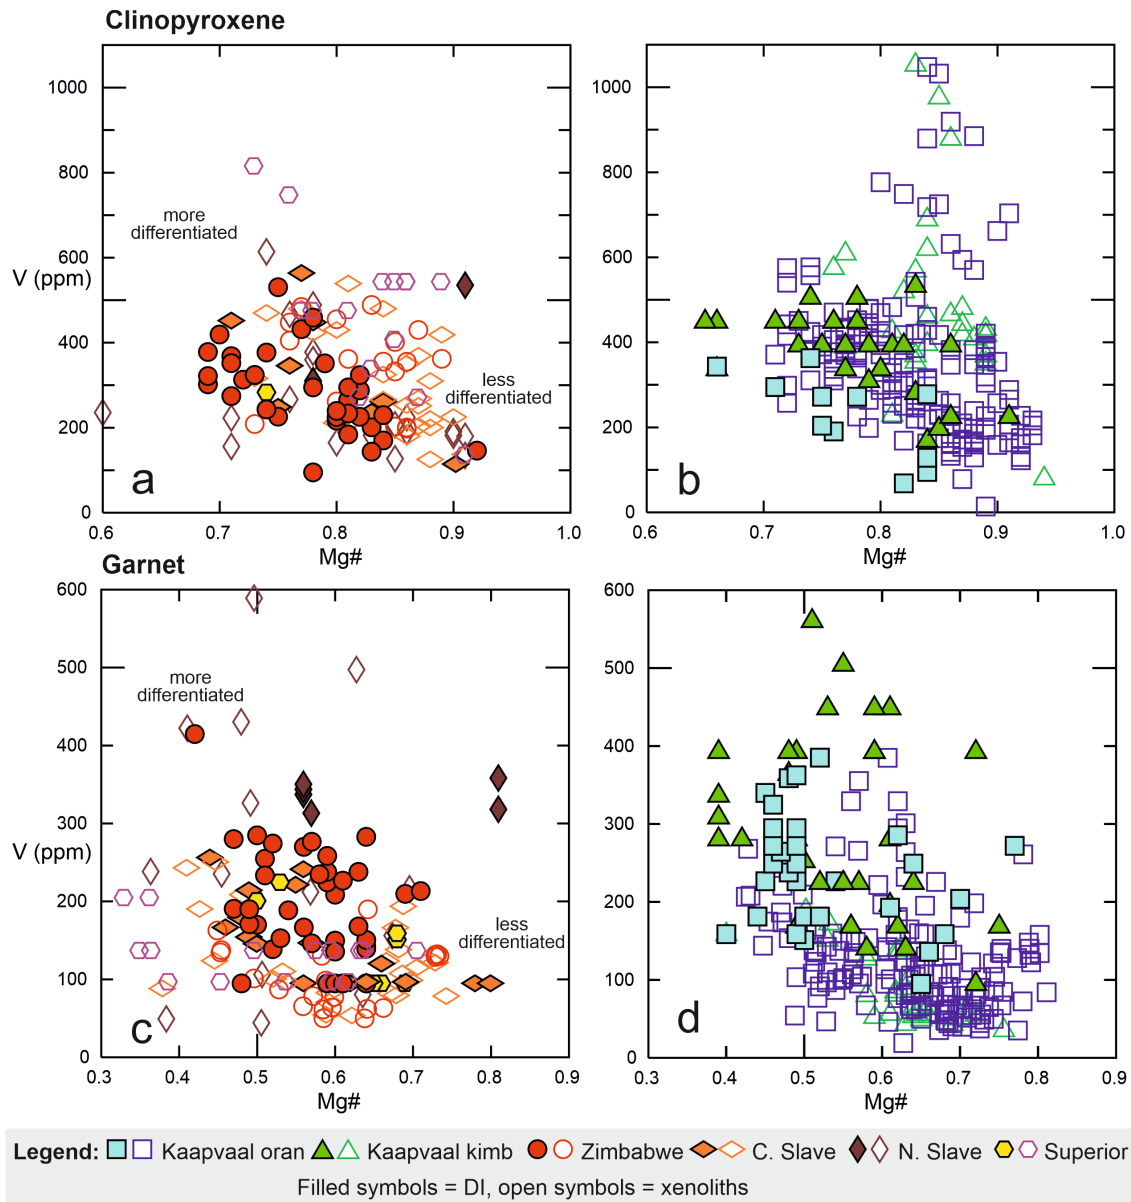

69  
 70  
 71  
 72  
 73  
 74

**Supplementary Fig. 3** Vanadium abundances (ppm) as a function of Mg# ( $\text{Mg}/(\text{Mg}+\text{Fe}^{\text{total}})$ ), as a proxy for the degree of differentiation during protolith formation. **a-b** Clinopyroxene and **c-d** garnet from eclogite xenoliths and DI. For typical  $1\sigma$  uncertainties see caption to [Supplementary Figure 2](#).

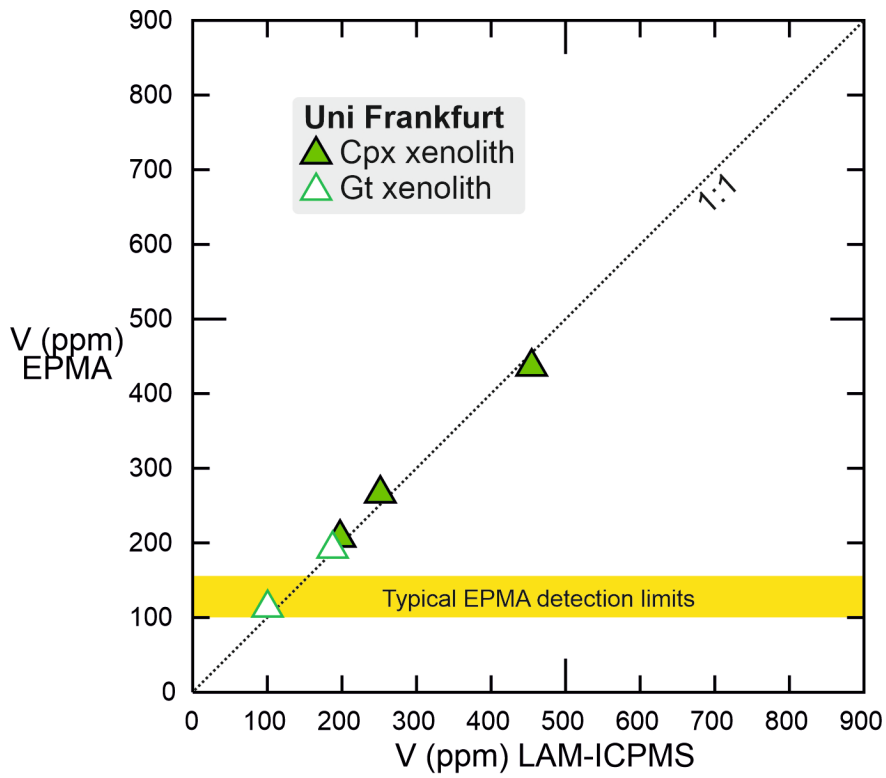

75  
76  
77  
78  
79  
80  
81  
82

**Supplementary Fig. 4** Vanadium abundances (ppm) in clinopyroxene (cpx) and garnet (gt) determined by electron probe microanalyser (EPMA) vs. laser ablation inductively-coupled plasma mass spectrometry (LAM-ICPMS) at Goethe-University Frankfurt. Typical reported detection limits for EPMA are shown as yellow bar.

83

84 **References for Supplementary Information (including Supplementary Data 1)**

- 85  
86 1 Jacob, D. E., Viljoen, K. S. & Grassineau, N. V. Eclogite xenoliths from Kimberley, South  
87 Africa - A case study of mantle metasomatism in eclogites. *Lithos* **112**, 1002-1013,  
88 doi:10.1016/j.lithos.2009.03.034 (2009).  
89 2 Shu, Q., Brey, G. P. & Pearson, D. G. Eclogites and garnet pyroxenites from Kimberley,  
90 Kaapvaal craton, South Africa: their diverse origins and complex metasomatic signatures.  
91 *Mineralogy and Petrology* **112**, 43-56, doi:10.1007/s00710-018-0595-6 (2018).  
92 3 Smart, K. A. *et al.* Metasomatized eclogite xenoliths from the central Kaapvaal craton as  
93 probes of a seismic mid-lithospheric discontinuity. *Chemical Geology* **578**, 120286,  
94 doi:https://doi.org/10.1016/j.chemgeo.2021.120286 (2021).  
95 4 Aulbach, S., Viljoen, K. S. & Gerdes, A. Diamondiferous and barren eclogites and pyroxenites  
96 from the western Kaapvaal craton record subduction processes and mantle metasomatism,  
97 respectively. *Lithos* **368**, doi:10.1016/j.lithos.2020.105588 (2020).  
98 5 Aulbach, S. & Viljoen, K. S. Eclogite xenoliths from the Lace kimberlite, Kaapvaal craton:  
99 From convecting mantle source to palaeo-ocean floor and back. *Earth and Planetary Science*  
100 *Letters* **431**, 274-286, doi:10.1016/j.epsl.2015.08.039 (2015).  
101 6 Aulbach, S., Gerdes, A. & Viljoen, K. S. Formation of diamondiferous kyanite-eclogite in a  
102 subduction melange. *Geochimica Et Cosmochimica Acta* **179**, 156-176,  
103 doi:10.1016/j.gca.2016.01.038 (2016).  
104 7 Burness, S. *et al.* Sulphur-rich mantle metasomatism of Kaapvaal craton eclogites and its  
105 role in redox-controlled platinum group element mobility. *Chemical Geology* **542**, 119476,  
106 doi:https://doi.org/10.1016/j.chemgeo.2020.119476 (2020).  
107 8 Huang, J.-X., Gréau, Y., Griffin, W. L., O'Reilly, S. Y. & Pearson, N. J. Multi-stage origin of  
108 Roberts Victor eclogites: Progressive metasomatism and its isotopic effects. *Lithos* **142**, 161-  
109 181, doi:10.1016/j.lithos.2012.03.002 (2012).  
110 9 Schulze, D. J., Valley, J. W. & Spicuzza, M. J. Coesite eclogites from the Roberts Victor  
111 Kimberlite, South Africa. *Lithos* **54**, 23-32 (2000).  
112 10 Jacob, D. E., Schmickler, B. & Schulze, D. J. Trace element geochemistry of coesite-bearing  
113 eclogites from the Roberts Victor kimberlite, Kaapvaal craton. *Lithos* **71**, 337-351,  
114 doi:10.1016/s00244937(03)00120-8 (2003).  
115 11 Radu, I. B., Harris, C., Moine, B. N., Costin, G. & Cottin, J. Y. Subduction relics in the  
116 subcontinental lithospheric mantle evidence from variation in the O-18 value of eclogite  
117 xenoliths from the Kaapvaal craton. *Contributions to Mineralogy and Petrology* **174**,  
118 doi:10.1007/s00410-019-1552-z (2019).  
119 12 Smart, K. A. *et al.* Constraints on Archean crust recycling and the origin of mantle redox  
120 variability from the  $\delta^{44}/^{40}\text{Ca}$  –  $\delta^{18}\text{O}$  –  $f\text{O}_2$  signatures of cratonic eclogites. *Earth and*  
121 *Planetary Science Letters* **556**, 116720 (2021b).  
122 13 Aulbach, S. *et al.* Eclogite xenoliths from Orapa: Ocean crust recycling, mantle  
123 metasomatism and carbon cycling at the western Zimbabwe craton margin. *Geochimica Et*  
124 *Cosmochimica Acta* **213**, 574-592, doi:10.1016/j.gca.2017.06.038 (2017).  
125 14 Aulbach, S. *et al.* Ultramafic Carbonated Melt- and Auto-Metasomatism in Mantle Eclogites:  
126 Compositional Effects and Geophysical Consequences. *Geochemistry Geophysics*  
127 *Geosystems* **21**, e2019GC008774, doi:10.1029/2019gc008774 (2020).  
128 15 Smart, K. A., Chacko, T., Simonetti, A., Sharp, Z. D. & Heaman, L. M. A Record of  
129 Paleoproterozoic Subduction Preserved in the Northern Slave Cratonic Mantle: Sr-Pb-O  
130 Isotope and Trace-element Investigations of Eclogite Xenoliths from the Jericho and Muskox  
131 Kimberlites. *Journal of Petrology* **55**, 549-583, doi:10.1093/petrology/egt077 (2014).  
132 16 Smart, K. A. *et al.* Tectonic significance and redox state of Paleoproterozoic eclogite and  
133 pyroxenite components in the Slave cratonic mantle lithosphere, Voyageur kimberlite, Arctic  
134 Canada. *Chemical Geology* **455**, 98-119, doi:10.1016/j.chemgeo.2016.10.014 (2017).  
135 17 Aulbach, S., Pearson, N. J., O'Reilly, S. Y. & Doyle, B. J. Origins of xenolithic eclogites and  
136 pyroxenites from the central slave craton, Canada. *Journal of Petrology* **48**, 1843-1873  
137 (2007).  
138 18 Schmidberger, S. S., Simonetti, A., Heaman, L. M., Creaser, R. A. & Whiteford, S. Lu-Hf, in-  
139 situ Sr and Pb isotope and trace element systematics for mantle eclogites from the Diavik  
140 diamond mine: Evidence for Paleoproterozoic subduction beneath the Slave craton, Canada.

- 141 *Earth and Planetary Science Letters* **254**, 55-68, doi:10.1016/j.epsl.2006.11.020 (2007).
- 142 19 Aulbach, S., Stachel, T., Heaman, L. M. & Carlson, J. A. Microxenoliths from the Slave craton:  
143 Archives of diamond formation along fluid conduits. *Lithos* **126**, 419-434,  
144 doi:10.1016/j.lithos.2011.07.012 (2011).
- 145 20 Smit, K. V. *et al.* Origin of eclogite and pyroxenite xenoliths from the Victor kimberlite,  
146 Canada, and implications for Superior craton formation. *Geochimica Et Cosmochimica Acta*  
147 **125**, 308-337, doi:10.1016/j.gca.2013.10.019 (2014).
- 148 21 Phillips, D., Harris, J. W. & Viljoen, K. S. Mineral chemistry and thermobarometry of inclusions  
149 from De Beers Pool diamonds, Kimberley, South Africa. *Lithos* **77**, 155-179 (2004).
- 150 22 Stachel, T. Stachel, Thomas, 2021, Diamond Inclusion Database, Scholars Portal Dataverse,  
151 V1 (2021).  
152 <https://dataverse.scholarsportal.info/dataset.xhtml?persistentId=doi:10.7939/DVN/EJUE1G>
- 153 23 Viljoen, K. S., Perritt, S. H. & Chinn, I. L. An unusual suite of eclogitic, websteritic and  
154 transitional websteritic-lherzolitic diamonds from the Voorspoed kimberlite in South Africa:  
155 Mineral inclusions and infrared characteristics. *Lithos* **320**, 416-434,  
156 doi:10.1016/j.lithos.2018.09.034 (2018).
- 157 24 Deines, P., Stachel, T. & Harris, J. W. Systematic regional variations in diamond carbon  
158 isotopic composition and inclusion chemistry beneath the Orapa kimberlite cluster, in  
159 Botswana. *Lithos* **112**, 776-784, doi:10.1016/j.lithos.2009.03.027 (2009).
- 160 25 Motsamai, T., Harris, J. W., Stachel, T., Pearson, D. G. & Armstrong, J. Mineral inclusions in  
161 diamonds from Karowe Mine, Botswana: super-deep sources for super-sized diamonds?  
162 *Mineralogy and Petrology* **112**, 169-180, doi:10.1007/s00710-018-0604-9 (2018).
- 163 26 De Stefano, A., Kopylova, M. G., Cartigny, P. & Afanasiev, V. Diamonds and eclogites of the  
164 Jericho kimberlite (Northern Canada). *Contributions to Mineralogy and Petrology* **158**, 295-  
165 315, doi:10.1007/s00410-009-0384-7 (2009).
- 166 27 Davies, R. A., Griffin, W. L., O'Reilly, S. Y. & Doyle, B. J. Mineral inclusions and geochemical  
167 characteristics of microdiamonds from the DO27, A154, A21, A418, DO18, DD17 and Ranch  
168 Lake kimberlites at Lac de Gras, Slave Craton, Canada. *Lithos* **77**, 39-55,  
169 doi:10.1016/j.lithos.2004.04.016 (2004).
- 170 28 Donnelly, C. L., Stachel, T., Creighton, S., Muehlenbachs, K. & Whiteford, S. Diamonds and  
171 their mineral inclusions from the A154 South pipe, Diavik Diamond Mine, Northwest  
172 Territories, Canada. *Lithos* **98**, 160-176, doi:10.1016/j.lithos.2007.03.003 (2007).
- 173 29 Promprated, P. *et al.* Multiple-mineral inclusions in diamonds from the Snap Lake/King Lake  
174 kimberlite dike, Slave craton, Canada: a trace-element perspective. *Lithos* **77**, 69-81,  
175 doi:https://doi.org/10.1016/j.lithos.2004.04.009 (2004).
- 176 30 Stachel, T. *et al.* The Victor Mine (Superior Craton, Canada): Neoproterozoic lherzolitic  
177 diamonds from a thermally-modified cratonic root. *Mineralogy and Petrology* **112**, 325-336,  
178 doi:10.1007/s00710-018-0574-y (2018).
- 179 31 Gale, A., Laubier, M., Escrig, S. & Langmuir, C. H. Constraints on melting processes and  
180 plume-ridge interaction from comprehensive study of the FAMOUS and North Famous  
181 segments, Mid-Atlantic Ridge. *Earth and Planetary Science Letters* **365**, 209-220,  
182 doi:10.1016/j.epsl.2013.01.022 (2013).
- 183 32 Donovan, J. J., Lowers, H. A. & Rusk, B. G. Improved electron probe microanalysis of trace  
184 elements in quartz. *American Mineralogist* **96**, 274-282, doi:doi:10.2138/am.2011.3631  
185 (2011).
- 186 33 Wang, J. T. *et al.* Oxidation State of Arc Mantle Revealed by Partitioning of V, Sc, and Ti  
187 Between Mantle Minerals and Basaltic Melts. *Journal of Geophysical Research-Solid Earth*  
188 **124**, 4617-4638, doi:10.1029/2018jb016731 (2019).
- 189 34 Katsura, T., Yoneda, A., Yamazaki, D., Yoshino, T. & Ito, E. Adiabatic temperature profile in  
190 the mantle. *Physics of the Earth and Planetary Interiors* **183**, 212-218,  
191 doi:10.1016/j.pepi.2010.07.001 (2010).
- 192 35 Herzberg, C. & Asimow, P. D. Petrology of some oceanic island basalts: PRIMELT2.XLS  
193 software for primary magma calculation. *Geochemistry Geophysics Geosystems* **9**,  
194 doi:10.1029/2008gc002057 (2008).
- 195 36 Aulbach, S. & Jacob, D. E. Major- and trace-elements in cratonic mantle eclogites and  
196 pyroxenites reveal heterogeneous sources and metamorphic processing of low-pressure  
197 protoliths. *Lithos* **262**, 586-605, doi:10.1016/j.lithos.2016.07.026 (2016).
- 198 37 Holycross, M. & Cottrell, E. Partitioning of V and 19 other trace elements between rutile and

199 silicate melt as a function of oxygen fugacity and melt composition: Implications for  
200 subduction zones. *American Mineralogist* **105**, 244-254, doi:10.2138/am-2020-7013 (2020).  
201 38 Mallmann, G. & O'Neill, H. S. C. The Crystal/Melt Partitioning of V during Mantle Melting as a  
202 Function of Oxygen Fugacity Compared with some other Elements (Al, P, Ca, Sc, Ti, Cr, Fe,  
203 Ga, Y, Zr and Nb). *Journal of Petrology* **50**, 1765-1794, doi:10.1093/petrology/egp053 (2009).  
204 39 Barth, M. G., Foley, S. F. & Horn, I. Partial melting in Archean subduction zones: constraints  
205 from experimentally determined trace element partition coefficients between eclogitic  
206 minerals and tonalitic melts under upper mantle conditions. *Precambrian Research* **113**, 323-  
207 340 (2002).  
208 40 Tappe, S. *et al.* Plates or plumes in the origin of kimberlites: U/Pb perovskite and Sr-Nd-Hf-  
209 Os-C-O isotope constraints from the Superior craton (Canada). *Chemical Geology* **455**, 57-  
210 83, doi:10.1016/j.chemgeo.2016.08.019 (2017).  
211 41 Krogh, E. J. The garnet-clinopyroxene Fe-Mg geothermometer - a reinterpretation of existing  
212 experimental data. *Contributions to Mineralogy and Petrology* **99**, 44-48,  
213 doi:10.1007/bf00399364 (1988).  
214 42 Jenner, F. E. & O'Neill, H. S. Analysis of 60 elements in 616 ocean floor basaltic glasses.  
215 *Geochemistry Geophysics Geosystems* **13**, Q02005, doi:10.1029/2011gc004009 (2012).
