# Supplementary material for: Evidence for oxygen-conserving diamond formation in redox-buffered subducted oceanic crust sampled as eclogite
Source: Springer Nature journal article supplement (doi:10.1038/s41467-022-29567-z), 2022-04-08
Supplement: MOESM4 [file 41467_2022_29567_MOESM4_ESM.xlsx]

## Sheet: Data S1
Sample	Reference		Locality	V ppm m measured/a accepted* in reference material (LAM/Xens)	CPX	TiO2	Al2O3	Al2O3/FeOtotal	Cr2O3	FeOtotal	Mg#	Jd	V	Ce	Yb	Eu/Eu*	GARNET	TiO2	Al2O3	Al2O3/FeOtotal	Cr2O3	FeOtotal	Na2O	Mg#	Ca#	V	Ce	Yb	Eu/Eu*	RUTILE	Mode	V	CPX/GT D	TiO2	V	WHOLE ROCKS	Al2O3	Al2O3/FeOtotal	Cr2O3	FeOtotal	MgO	V no rut	V rt D fixed	Eu/Eu*	SHREE	THERMOOXYBAROMETRY	fO2	T
				& overlap correction		wt.%	wt.%		wt.%	wt.%			ppm	ppm	ppm			wt.%	wt.%		wt.%	wt.%	wt.%			ppm	ppm	ppm			wt.%	ppm					wt.%		wt.%	wt.%	wt.%	ppm	ppm		ppm		DFMQ	oC
XENOLITHS				or V method/correction employed
Kaapvaal, kimberlite-hosted				(EPMA/DI)
DJ0220	1	Jacob et al., 2009	Kimberley	BCR-2G: m 462 ppm/a 425±18 ppm		0.3	6.39	1.07939	0.055	5.92	0.773326	0.219077	608	26.7	0.371	0.956992		0.128	22.04	1.34308	0.04	16.41	0.054	0.531891	0.269425	172	1.03	17.9	1.00517		1.69127	2149.34		2.34375	3.53488		14.7571	1.28315	0.0459466	11.5007	10.6672	361.604	397.955	0.962488	32.9796			1048.23
DJ0296	1	Jacob et al., 2009	Kimberley			0.222	3.61	0.672253	0.135	5.37	0.824882	0.133181	519	41.4	0.203	0.892839		0.093	23.01	1.48643	0.15	15.48	0.024	0.623156	0.173143	139	0.525	8.58	0.930562		0.990476	1834.72		2.3871	3.73381		14.1482	1.30672	0.141839	10.8272	14.1421	306.741	324.914	0.8701	16.9338			915.543
K3-V1	1	Jacob et al., 2009	Kimberley			0.292	7.63	1.34331	0.079	5.68	0.764607	0.260653	574	23.6	0.172	1.00018		0.146	21.98	1.37289	0.07	16.01	0.071	0.502457	0.315742	189	1.8	8.23	1.05878		1.86444	2029.15		2	3.03704		15.2465	1.36626	0.072661	11.1593	9.46496	355.137	392.969	1.02611	18.8538			1069.64
K8-49	1	Jacob et al., 2009	Kimberley			0.059	12.76	12.3883	0.098	1.03	0.943506	0.368507	79.2	6.33	0.05	0.990065		0.06	23.14	3.28227	0.11	7.05	0.037	0.755793	0.413882	35.1	2.81	0.38	1.38472		0.109299	279.98		0.983333	2.25641		18.4494	4.25436	0.104486	4.33658	11.0625	54.8825	55.1886	1.35192	1.1284			911.76
KimE-1	1	Jacob et al., 2009	Kimberley			0.259	4.49	0.828413	0.127	5.42	0.812088	0.160801	425	43	0.269	0.891405		0.089	22.68	1.5	0.14	15.12	0.034	0.634112	0.152219	102	0.365	10.8	0.994656		1.32721	1502.42		2.91011	4.16667		14.3142	1.34802	0.132378	10.6187	13.8133	243.853	263.793	0.893813	22.7212			941.989
XM1-724	1	Jacob et al., 2009	Kimberley			0.3	4.78	0.867514	0.166	5.51	0.805854	0.180212	228	41.3	0.082	0.858845		0.103	22.64	1.415	0.16	16	0.032	0.619282	0.146786	138	0.456	4.35	0.888435		0.528339	806.003		2.91262	1.65217		14.5306	1.29475	0.161839	11.2227	13.731	177.533	181.792	0.820605	8.22678			917.937
KimPo 14	2	Shu et al., 2018	Kimberley	BIR-1G: m 349±41 ppm/a 326±26 ppm		0.314	14.044	4.70643	0.1587	2.984	0.840255	0.436261	618.8	6.75	0.0215	1.20201		0.146429	22.6629	1.63774	0.137286	13.8379	0.0892857	0.586315	0.308037	132.35	1.263	4.26	1.22718		1.93324	2187.52		2.14439	4.67548		18.4296	2.09641	0.144061	8.79102	9.82197	343.992	386.282	1.2078	14.2368			988.509
KimPo 2b	2	Shu et al., 2018	Kimberley			0.291462	13.7669	4.88455	0.0940769	2.81846	0.83321	0.483975	280.06	8.6628	0.0086	1.16196		0.115923	22.9738	1.77679	0.053	12.93	0.0745385	0.6449	0.254866	55.9833	0.9135	1.46883	1.2319		1.17026	990.04		2.51427	5.00256		18.6157	2.2462	0.070624	8.28766	10.6762	154.852	166.438	1.1997	4.88729			1075.92
KimPo 7a	2	Shu et al., 2018	Kimberley			0.29	11.1771	3.41361	0.224429	3.27429	0.835575	0.389063	394.838	10.7312	0.00986188	1.11463		0.111625	23	1.70877	0.1405	13.46	0.063875	0.658849	0.200628	64.8	0.4265	1.37333	1.17686		0.896731	1395.79		2.59798	6.09317		17.5265	1.99133	0.176632	8.8014	12.1136	211.256	223.773	1.12586	4.11379			1009.46
KimPo 7b	2	Shu et al., 2018	Kimberley			0.29	11.1771	3.41361	0.224429	3.27429	0.835575	0.389063	459.18	13.005	0.03162	1.22178		0.111625	23	1.70877	0.1405	13.46	0.063875	0.658849	0.200628	66.5671	0.566857	1.64571	1.21928		1.06423	1623.25		2.59798	6.898		17.4979	1.99125	0.176326	8.78738	12.0935	240.445	257.72	1.18536	4.8151			1009.46
KimPo 8a	2	Shu et al., 2018	Kimberley			0.333417	16.6208	7.35164	0.188417	2.26083	0.832698	0.557908	368.486	3.92643	0.0022	1.12932		0.143421	22.8472	1.81018	0.11452	12.6215	0.0831071	0.617311	0.320687	85.0086	1.068	1.09914	1.1993		1.40858	1302.63		2.32475	4.33469		19.7674	2.51673	0.14564	7.85439	8.99745	209.379	227.728	1.18603	4.62218			1097.99
KimPo 8a	2	Shu et al., 2018	Kimberley			0.333417	16.6208	7.35164	0.188417	2.26083	0.832698	0.557908	353.54	4.3314	0.00438	1.21103		0.143421	22.8472	1.81018	0.11452	12.6215	0.0831071	0.617311	0.320687	80.4583	1.26233	1.05817	1.27819		1.31213	1249.8		2.32475	4.39408		19.7864	2.51685	0.145786	7.86157	9.006	200.498	216.897	1.26103	4.40789			1097.99
Palm-10	3	Smart et al., 2021a	Palmietfontein	NIST612: reported accuracy better than 6%		0.12	5.15	1.38814	0.2	3.71	0.86895	0.171865	480	16	0.06	1.03394		0.04	22.7	1.45513	0.18	15.6	bd	0.636141	0.122949	53	0.1	2	1.04875		0.362559	1696.85		3	9.0566		14.752	1.44422	0.188311	10.2145	14.5722	244.184	250.336	0.990134	4.68892		-3.5	695.527
Palm-12	3	Smart et al., 2021a	Palmietfontein			0.25	5.4	1.73077	0.23	3.12	0.888874	0.194091	431	37	0.15	0.92755		0.06	23.1	1.83333	0.21	12.6	0.01	0.718037	0.100546	55	0.1	5	0.911627		0.767901	1523.63		4.16667	7.83636		15.0256	1.81608	0.217311	8.27364	16.0771	222.334	234.034	0.882563	11.0604			720.843
Palm-13	3	Smart et al., 2021a	Palmietfontein			0.24	6.61	1.74868	0.06	3.78	0.855949	0.238229	465	20	0.03	1.03982		0.04	22.7	1.48366	0.02	15.3	bd	0.640623	0.122707	65	0.07	2.4	1.16299		0.267372	1643.82		6	7.15385		15.4203	1.5282	0.0378931	10.0905	14.0477	244.291	248.687	1.02035	4.50516		-4.1	744.324
Palm-14	3	Smart et al., 2021a	Palmietfontein			0.34	11.53	3.53681	0.1	3.26	0.838142	0.375488	688	3.1	0.06	0.946101		0.07	22.6	1.54795	0.11	14.6	0.01	0.579775	0.275223	80	0.15	6.1	0.97371		0.289688	2432.15		4.85714	8.6		17.5691	1.85501	0.105196	9.47113	10.4464	352.488	359.533	0.94586	11.121		-3.4	944.45
Palm-15	3	Smart et al., 2021a	Palmietfontein			0.23	6.39	1.775	0.27	3.6	0.862799	0.22469	878	14	0.04	1.28812		0.04	22.7	1.49342	0.19	15.2	bd	0.629698	0.151115	89	0.08	2.4	1.40696		0.104929	3103.82		5.75	9.86517		15.3452	1.53912	0.225759	9.97014	13.6757	443.543	446.799	1.23269	4.27013		-3.6	758.543
Palm-16	3	Smart et al., 2021a	Palmietfontein			0.3	7.83	2.55049	0.13	3.07	0.892511	0.175607	416	8.7	0.08	1.18507		0.07	22.7	1.65693	0.13	13.7	0.01	0.659717	0.170183	53	0.19	1.6	1.61267		0.0432841	1470.6		4.28571	7.84906		16.0019	1.79537	0.129944	8.91287	14.6237	216.248	216.885	1.31853	3.36506		-2.8	736.683
Palm-17	3	Smart et al., 2021a	Palmietfontein			0.22	9.6	3.93443	0.14	2.44	0.890223	0.323789	349	3.5	0.02	1.05777		0.03	22.8	1.57241	0.11	14.5	0.01	0.632505	0.182183	43	0.05	0.8	1.07631		0.140466	1233.75		7.33333	8.11628		16.8372	1.85819	0.123324	9.0611	12.6774	180.425	182.158	1.01345	1.9365		-3.9	722.22
Palm-18	3	Smart et al., 2021a	Palmietfontein			0.24	5.41	1.69592	0.21	3.19	0.886664	0.197177	418	18	0.02	1.02666		0.06	23.2	1.8125	0.22	12.8	0.01	0.713701	0.100752	67	0.15	1.3	1.20059		0.2459	1477.67		4	6.23881		15.1593	1.79276	0.214971	8.45584	16.1058	224.354	227.987	1.06049	2.99007		-4.5	721.65
Palm-2	3	Smart et al., 2021a	Palmietfontein			0.26	8.57	2.78247	0.09	3.08	0.871325	0.281168	418	10	0.03	1.16316		0.05	22.7	1.44586	0.06	15.7	0.01	0.608689	0.186818	56	0.11	1.6	1.2317		0.154296	1477.67		5.2	7.46429		16.3174	1.63068	0.0733843	10.0065	12.7804	218.534	220.814	1.11361	3.34903		-3.2	757.672
Palm-20	3	Smart et al., 2021a	Palmietfontein			0.21	6.58	1.45575	0.07	4.52	0.829085	0.258266	568	22	0.07	1.16148		0.02	22.9	1.30114	0.05	17.6	0.01	0.591563	0.109389	52	0.09	4.2	1.28689		0.368201	2007.94		10.5	10.9231		15.5017	1.32797	0.0587791	11.6733	13.351	283.059	290.452	1.14112	7.60067		-4.2	714.655
Palm-22	3	Smart et al., 2021a	Palmietfontein			0.29	8.75	3.25279	0.09	2.69	0.886616	0.272882	368	8.5	0.01	1.5088		0.05	22.8	1.74046	0.04	13.1	bd	0.647518	0.227345	49	0.17	1	1.65434		0.0833922	1300.92		5.8	7.5102		16.4643	1.95796	0.0624458	8.40892	12.7245	192.376	193.461	1.50556	2.45098		-1.6	826.832
Palm-23	3	Smart et al., 2021a	Palmietfontein			0.26	7.35	1.91406	0.05	3.84	0.846724	0.259618	975	19	0.11	0.892358		0.05	22.6	1.37805	0.06	16.4	0.01	0.57798	0.182954	127	0.56	9.2	1.05985		0.875223	3446.72		5.2	7.67717		15.6064	1.4641	0.0550186	10.6594	12.1778	503.778	533.944	0.933164	16.4633		-2.8	780.201
Palm-24	3	Smart et al., 2021a	Palmietfontein			0.29	8.55	2.17005	0.09	3.94	0.833943	0.284274	1052	12	0.05	0.924786		0.06	22.4	1.32544	0.07	16.9	0.01	0.53253	0.23704	151	0.2	6.2	1.03559		0.723442	3718.93		4.83333	6.96689		16.0555	1.46058	0.0784212	10.9926	10.8558	552.098	579.003	0.958921	11.7378		-2.9	826.446
Palm-6	3	Smart et al., 2021a	Palmietfontein			0.26	7.72	2.54785	0.13	3.03	0.877712	0.268864	408	19	0.02	1.37108		0.03	23	1.75573	0.09	13.1	0.01	0.695686	0.129584	50	0.1	1.3	1.50614		0.354103	1442.32		8.66667	8.16		16.0696	1.8817	0.10761	8.53994	14.6787	210.289	215.396	1.34854	3.03395		-4	783.288
Palm-7	3	Smart et al., 2021a	Palmietfontein			0.16	11.15	2.49441	0.03	4.47	0.770737	0.431496	389		0.05	1.24444		0.06	21.6	1	0.03	21.6	0.007	0.395265	0.225792	158	0.02	3.4	1.07799		0.793531	1375.15		2.66667	2.46203		16.7676	1.21609	0.0297619	13.7881	8.08463	259.78	270.692	1.08573	9.55202		-4.6	754.688
Palm-8	3	Smart et al., 2021a	Palmietfontein			0.24	7.41	2.29412	0.09	3.23	0.874274	0.272422	442	20	0.08	1.04943		0.03	23.3	1.70073	0.05	13.7	0.005	0.692404	0.109432	43	0.04	2.8	1.12436		0.266885	1562.51		8	10.2791		16.1085	1.79664	0.0678132	8.96591	15.1451	221.903	226.073	0.981634	6.24373		-3.7	747.196
Kaapvaal, lamproite-hosted
DS104	4	Aulbach et al., 2020a	Doornkloof-Sover	BIR-1G: m 320±10 ppm/a 326±26 ppm		0.44	3.94	1.20122	0.43	3.28	0.891764	0.16135	380.147	9.82667	0.19	1.04255		0.383333	22.7233	2.38607	0.523333	9.52333	0.0933333	0.791033	0.0949604	122.423	0.0666778	2.38889	1.07106		0.0770686	1343.86		1.14783	3.10518		14.2606	2.12562	0.480966	6.7089	17.9312	238.205	239.241	1.02007	5.06438			880.113
DS112	4	Aulbach et al., 2020a	Doornkloof-Sover			0.44	4.96	1.00202	0.22	4.95	0.834384	0.206987	276.25	14.7	0.146667	1.05579		0.343333	22.59	1.65859	0.193333	13.62	0.0966667	0.703976	0.0838649	79.8167	0.124878	1.81567	1.07902		0.0278387	976.571		1.28155	3.46106		14.6527	1.50811	0.205276	9.71592	16.2845	168.162	168.434	1.03314	3.75907			865.057
DS171	4	Aulbach et al., 2020a	Doornkloof-Sover			0.365	9.805	2.23349	0.06	4.39	0.79001	0.396512	419.382	2.07367	0.0424778			0.44	21.83	1.37123	0.08	15.92	0.14	0.558554	0.254271	149.923	0.295444	2.56222	1.11523		0	1482.56		0.829545	2.79731		16.4188	1.52996	0.071	10.7315	10.3843	271.18	271.18	1.09278	5.69965			1032.83
DS172	4	Aulbach et al., 2020a	Doornkloof-Sover			0.304	5.03625	0.83468	0.09275	6.03375	0.803264	0.182787	299.933	13.335	0.126317	0.973118		0.415	22.21	1.47379	0.117	15.07	0.134	0.642749	0.14017	115.5	0.366844	2.29922	1.06773		0.0733629	1060.29		0.73253	2.59683		14.4718	1.3161	0.106011	10.9959	14.5739	198.343	199.12	0.972538	5.17243			968.844
DS173	4	Aulbach et al., 2020a	Doornkloof-Sover			0.352687	4.46333	1.245	0.22	3.585	0.887059	0.182516	365.581	9.84429	0.174429	1.01468		0.380167	23.195	2.52165	0.218167	9.19833	0.105167	0.80217	0.0933741	134.307	0.118783	2.26883	1.0869		0.0921417	1292.37		0.927718	2.72199		14.753	2.21303	0.21879	6.66644	18.5989	238.15	239.341	1.00343	5.11923			943.283
DS175	4	Aulbach et al., 2020a	Doornkloof-Sover			0.47	6.715	1.02168	0.178	6.5725	0.77555	0.28159	364.215	10.3575	0.218	0.989062		0.3525	22.47	1.47199	0.2275	15.265	0.1535	0.665276	0.0950071	80.8988	0.33575	3.6525	1.00307		0	1287.54		1.33333	4.50211		15.3803	1.35469	0.205225	11.3534	15.094	208.391	208.391	0.957357	6.1992			1018.07
DS176	4	Aulbach et al., 2020a	Doornkloof-Sover			0.407467	9.88067	2.20354	0.072	4.484	0.795661	0.391392	404.419	2.54343	0.0398	1.09559		0.455154	22.1462	1.39968	0.0677692	15.8223	0.157231	0.566484	0.248269	148.77	0.3285	2.59125	1.1441		0	1429.66		0.895228	2.71841		16.6267	1.55099	0.0696731	10.7201	10.7868	263.812	263.812	1.11484	5.8797			1022.65
DS177	4	Aulbach et al., 2020a	Doornkloof-Sover			0.3436	9.494	2.10261	0.0493333	4.51533	0.80065	0.372698	371.7	2.42025	0.0565	1.08021		0.2835	22.43	1.29941	0.0415	17.2617	0.1395	0.549085	0.207162	100.18	0.1748	2.14	1.40359		0.248873	1314		1.21199	3.71032		16.5691	1.44095	0.044912	11.4987	11.0361	221.777	225.047	1.29232	6.14194			906.531
DS178	4	Aulbach et al., 2020a	Doornkloof-Sover			0.457857	3.83143	1.04439	0.298286	3.66857	0.885336	0.156674	387.128	11.106	0.2602	0.973327		0.465467	22.7593	2.30669	0.3128	9.86667	0.109067	0.788409	0.0910943	147.856	0.0934333	3.43333	1.03372		0.020712	1368.54		0.983652	2.61829		14.239	2.01226	0.306205	7.07612	18.4899	255.473	255.756	0.96077	6.72331			897.171
DS179	4	Aulbach et al., 2020a	Doornkloof-Sover			0.377133	6.16467	1.53528	0.115667	4.01533	0.859847	0.256907	347.236	2.88	0.1648	1.03386		0.2685	23.135	1.85749	0.1345	12.455	0.129	0.724943	0.102693	89.9586	0.0383429	3.06	1.03844		0	1227.51		1.40459	3.85995		15.4983	1.79024	0.126025	8.65715	16.3469	205.733	205.733	0.997647	5.54651			864.069
DS68	4	Aulbach et al., 2020a	Doornkloof-Sover			0.4	3.87	1.14159	0.41	3.39	0.889894	0.164466	391.323	10.1986	0.198714	0.995539		na	na	na	na	na	na	na	na	119.723	0.0691	2.52111	1.0252		0.342575	1383.37		na	3.26856		na	na	na	na	na	241.068	245.807	0.96988	5.31182			na
DS69	4	Aulbach et al., 2020a	Doornkloof-Sover			0.215	4.09	0.832146	0.19	4.915	0.842913	0.151964	296.06	11.9575	0.1394	0.975412		0.363333	22.1367	1.46827	0.0633333	15.0767	0.123333	0.62863	0.165531	123.052	0.1848	3.068	1.20608		0.155062	1046.6		0.591743	2.40597		13.9953	1.33436	0.120137	10.4884	14.5093	200.581	202.204	1.01087	6.17547			851.065
DS74	4	Aulbach et al., 2020a	Doornkloof-Sover			0.825	9.255	1.6026	0.085	5.775	0.743792	0.382009	377.235	2.6	0.0645	1.03799		0.345	21.885	1.2128	0.045	18.045	0.135	0.542218	0.177512	100.055	0.194167	2.865	1.05992		0	1333.56		2.3913	3.77028		16.2015	1.29369	0.063	12.5235	10.8268	224.786	224.786	1.03399	7.16918			1005.94
DS76	4	Aulbach et al., 2020a	Doornkloof-Sover			0.32	4.025	1.12117	0.61	3.59	0.879326	0.172798	381.41	8.175	0.13275	0.979685		0.36	22.2033	1.9991	0.673333	11.1067	0.133333	0.751411	0.1056	135.409	0.106475	1.81875	1.05073		0.0522604	1348.32		0.888889	2.81673		14.0162	1.8155	0.644498	7.72033	16.9533	245.974	246.679	0.968831	4.48869			853.209
DS81	4	Aulbach et al., 2020a	Doornkloof-Sover			0.56	10.12	2.81894	0.1	3.59	0.828805	0.388007	251.63	3.26	0.0213333	0.95612		0.293333	22.1667	1.61998	0.08	13.6833	0.0933333	0.620173	0.254221	76.5233	0.226333	0.915556	1.11107		0	889.537		1.90909	3.28828		16.7457	1.83186	0.089	9.14133	11.2808	155.321	155.321	1.01737	3.57799			1034.26
DS82	4	Aulbach et al., 2020a	Doornkloof-Sover			0.33	8.5	1.53153	0.05	5.55	0.768749	0.301812	434.4	8.27	0.07325	1.02875		0.4	21.9133	1.83734	0.243333	11.9267	0.163333	0.717584	0.153759	198.24	0.4755	3.63	0.8333		0.12415	1535.65		0.825	2.19128		15.8585	1.75303	0.156151	9.04632	13.9905	304.119	306.026	0.866461	7.21364			1439.97
DS84	4	Aulbach et al., 2020a	Doornkloof-Sover			0.47	3.88	1.20124	0.06	3.23	0.895936	0.16642	256.603	12.4033	0.0544833	1.13394		0.433333	22.9967	2.62919	0.0633333	8.74667	0.1	0.810601	0.0886219	84.0011	0.0785111	0.528222	1.18419		0.0154703	907.118		1.08462	3.05476		14.3921	2.29787	0.0618238	6.26324	18.5672	161.646	161.786	1.11025	2.09488			907.438
DS86	4	Aulbach et al., 2020a	Doornkloof-Sover			0.42	3.91	1.18485	0.42	3.3	0.890012	0.16801	381.352	9.748	0.183	0.992941		0.355	22.515	2.33801	0.545	9.63	0.09	0.78887	0.0940006	132.045	0.0717	2.68667	1.06924		0.129761	1348.12		1.1831	2.88805		14.1256	2.08554	0.488124	6.77311	17.8199	243.9	245.649	0.979031	5.6003			880.309
DS88	4	Aulbach et al., 2020a	Doornkloof-Sover			0.375	4.685	1.08701	0.21	4.31	0.855158	0.200994	381.695	4.97	0.111	1.03457		0.386667	22.56	1.95212	0.0733333	11.5567	0.0966667	0.741914	0.103277	121.123	0.099	2.825	1.05557		0	1349.33		0.969828	3.15129		14.5162	1.74986	0.134833	8.29567	16.6739	238.381	238.381	1.00204	5.31612			935.167
DS90	4	Aulbach et al., 2020a	Doornkloof-Sover			0.35	4.36	1.23513	0.66	3.53	0.880421	0.186892	348.076	8.43	0.128314	1.01696		0.36	22.1067	1.99399	0.91	11.0867	0.0933333	0.752866	0.106922	139.836	0.10988	1.7646	1.07506		0.0529644	1230.48		0.972222	2.48917		14.1137	1.83717	0.797084	7.6823	16.9728	233.415	234.066	1.00404	4.35622			855.146
DS92	4	Aulbach et al., 2020a	Doornkloof-Sover			0.48	8.69	1.44592	0.11	6.01	0.746533	0.369019	371.54	2.87517	0.0866	0.996438		0.323333	21.7767	1.09522	0.09	19.8833	0.12	0.519649	0.12979	91.5525	0.1543	2.79875	1.07988		0	1313.43		1.48454	4.05822		15.8877	1.16476	0.099	13.6403	11.1052	217.547	217.547	1.02298	5.16412			849.191
DS93	4	Aulbach et al., 2020a	Doornkloof-Sover			0.39	8.05333	1.39977	0.21	5.75333	0.764143	0.344962	337.055	2.45463	0.102362	0.994804		0.28	21.85	1.14398	0.2	19.1	0.106667	0.539575	0.136078	87.055	0.06965	2.505	1.00272		0	1191.52		1.39286	3.87175		15.6415	1.19455	0.2045	13.094	11.6117	199.555	199.555	0.964841	5.08054			855.503
DS94	4	Aulbach et al., 2020a	Doornkloof-Sover			0.31	5.305	0.965423	0.275	5.495	0.803877	0.227327	468.645	8.8625	0.0835375	1.112		0.355	21.875	1.46223	0.335	14.96	0.085	0.654031	0.128505	158.528	0.117844	1.49056	1.18731		0	1656.71		0.873239	2.95623		14.4185	1.34743	0.308	10.7008	14.4115	298.081	298.081	1.10041	3.45414			967.641
DS95	4	Aulbach et al., 2020a	Doornkloof-Sover			0.433333	3.54667	1.00094	0.333333	3.54333	0.887174	0.14844	364.97	12.2933	0.241667	0.977455		0.465	22.465	2.33281	0.39	9.63	0.105	0.788746	0.0941739	139.959	0.0970111	2.94222	1.06779		0.0211731	1290.21		0.9319	2.60769		13.949	2.02464	0.364423	6.88961	18.1232	241.16	241.434	0.978152	5.80689			896.316
DS96	4	Aulbach et al., 2020a	Doornkloof-Sover			0.31	6.82	1.66341	0.19	4.1	0.840055	0.287595	428.783	4.2	0.0807	1.20768		0.303333	22.31	1.69701	0.18	13.1467	0.09	0.690147	0.14334	132.349	0.1278	2.03011	1.24837		0	1515.79		1.02198	3.2398		15.3395	1.69018	0.1845	9.07567	14.4707	265.744	265.744	1.1931	3.83981			954.287
DS98	4	Aulbach et al., 2020a	Doornkloof-Sover			0.4	9.71	2.19187	0.08	4.43	0.788411	0.404677	409.56	2.01517	0.04415	1.12533		0.43	21.73	1.33847	0.08	16.235	0.155	0.54525	0.253061	137.144	0.2664	2.3078	1.13425		0	1447.84		0.930233	2.98635		16.321	1.49422	0.08	10.9227	10.173	259.731	259.731	1.11252	5.18752			1007.6
DS22	4	Aulbach et al., 2020a	Doornkloof-Sover			0.458727	10.39	2.26946	0.0742727	4.57818	0.78778	0.408356	444.904	2.22844	0.0578222			0.48675	22.255	1.35929	0.06975	16.3725	0.17475	0.549212	0.248959	150.194	0.247333	2.86667	1.194		0	1572.78		0.942429	2.96219		16.9158	1.52875	0.0717852	11.0651	10.4446	282.814	282.814	1.15464	6.18883			1011.88
39	5,6	Aulbach and Viljoen, 2015; Aulbach et al. 2016	Kroonstadt/Lace	BIR-1G: m 348±10 ppm/a 326±26 ppm		0.263333	11.9567	6.27098	0.22	1.90667	0.892426	0.381976	304.72	5.45833	0.04845	0.899422		0.235	22.8	2.02217	0.155	11.275	0.075	0.688345	0.262511	107.897	0.7785	3.01833	0.894104		0.355295	1077.22		1.12057	2.82418		17.8588	2.53826	0.183584	7.03583	11.6359	195.734	199.561	0.880012	6.04611			928.69
40	5,6	Aulbach and Viljoen, 2015; Aulbach et al. 2016	Kroonstadt/Lace			0.256667	4.25667	1.07764	0.18	3.95	0.865969	0.182263	199.526	12.0733	0.111556	0.949067		0.38	22.75	1.99387	0.21	11.41	0.08	0.755048	0.0918038	84.5167	0.114675	1.67167	0.957366		0.327	705.343		0.675439	2.36078		14.3838	1.79173	0.195862	8.02789	17.2383	135.806	138.113	0.919429	5.06442			892.604
43	5,6	Aulbach and Viljoen, 2015; Aulbach et al. 2016	Kroonstadt/Lace			0.44	4.25667	1.22084	0.263333	3.48667	0.880414	0.181552	336	13.535	0.151667	0.962515		0.38	23.1	2.19791	0.24	10.51	0.09	0.774414	0.0970872	35.055	0.0492	2.585	0.969747		0.167604	1187.79		1.15789	9.58494		14.5976	1.98937	0.250078	7.33777	17.583	170.169	172.16	0.933552	5.36734		-4.22984	893.904
48	5,6	Aulbach and Viljoen, 2015; Aulbach et al. 2016	Kroonstadt/Lace			0.18	12.9633	10.8028	0.02	1.2	0.927223	0.383334	216.023	7.10556	0.01925	1.2044		0.156667	23.12	2.78778	0.03	8.29333	0.07	0.742901	0.343775	85.6933	1.85	0.946667	1.13199		0.296582	763.664		1.14894	2.52089		18.496	3.63575	0.0254259	5.08726	11.2207	143.894	146.159	1.12818	2.37284			946.538
52	5,6	Aulbach and Viljoen, 2015; Aulbach et al. 2016	Kroonstadt/Lace			0.243333	8.49667	3.31039	0.203333	2.56667	0.886684	0.320219	194.057	2.26583	0.07965	0.979295		0.17	23.075	1.97054	0.205	11.71	0.07	0.719079	0.157336	74.8515		1.68205	0.862327		0.443695	686.01		1.43137	2.59256		16.4447	2.17413	0.203344	7.56383	14.256	127.897	130.941	0.872715	5.7829			851.879
53	5,6	Aulbach and Viljoen, 2015; Aulbach et al. 2016	Kroonstadt/Lace			0.256667	8.26333	1.84175	0.22	4.48667	0.812639	0.349862	231.909	14.6867	0.571417	0.898739		0.126667	22.93	1.52157	0.186667	15.07	0.0733333	0.673557	0.0769048	55.7805	0.219408	6.47255	0.836384		0.850607	819.822		2.02632	4.15753		16.1973	1.5842	0.199937	10.2243	14.3857	133.815	140.788	0.85143	12.6551			850.054
59	5,6	Aulbach and Viljoen, 2015; Aulbach et al. 2016	Kroonstadt/Lace			0.18	12.6	4.90272	0.07	2.57	0.848108	0.446821	417.283	3.54333	0.0294667	0.814782		0.153333	22.52	1.50669	0.0433333	14.9467	0.0866667	0.56378	0.283473	134.467	0.535722	3.56667	0.858744		0.752627	1475.14		1.17391	3.10325		17.9238	1.92497	0.0549068	9.31125	9.51159	259.658	270.76	0.839187	8.78924			893.667
62	5,6	Aulbach and Viljoen, 2015; Aulbach et al. 2016	Kroonstadt/Lace			0.18	12.02	8.52482	0.16	1.41	0.919705	0.36461	159.932	0.864333	0.0126	1.62573		0.18	23.01	2.51384	0.16	9.15333	0.0733333	0.715965	0.337233	62.3611	0.138533	0.663333	1.84319		0	565.374		1	2.56461		18.0645	3.18663	0.16	5.66883	11.1958	106.268	106.268	1.78554	1.53813			927.787
64	5,6	Aulbach and Viljoen, 2015; Aulbach et al. 2016	Kroonstadt/Lace			0.15	7.79	3.18392	0.09	2.44667	0.894306	0.264358	226.023	1.54	0.0180722	1.16241		0.166667	22.9567	1.91732	0.106667	11.9733	0.0666667	0.685153	0.233612	91.1011	0.0881111	1.28333	1.17209		0.0801247	799.015		0.9	2.48102		16.1193	2.09872	0.0990879	7.68056	13.2547	151.689	152.329	1.13443	2.85703			873.745
70	5,6	Aulbach and Viljoen, 2015; Aulbach et al. 2016	Kroonstadt/Lace			0.186667	8.43667	2.25378	0.103333	3.74333	0.852911	0.336656	262.52	39.0089	0.366444	0.925367		0.095	23.285	1.88772	0.075	12.335	0.08	0.742903	0.0623885	49.9433	0.313444	4.63667	0.890786		0.935653	928.034		1.96491	5.25636		16.4548	1.96042	0.0869157	8.39353	16.3262	144.141	152.824	0.883004	9.42411			833.716
72	5,6	Aulbach and Viljoen, 2015; Aulbach et al. 2016	Kroonstadt/Lace			0.23	4.16333	0.575311	0.116667	7.23667	0.781932	0.178689	375.46	9.59	0.33425	0.953457		0.14	22.19	1.04769	0.02	21.18	0.09	0.51148	0.10654	108.072	0.417304	4.56231	0.770218		1.10749	1327.29		1.64286	3.47416		13.9321	0.944666	0.0627432	14.7481	13.243	225.719	240.419	0.810685	11.0594			700.702
77	5,6	Aulbach and Viljoen, 2015; Aulbach et al. 2016	Kroonstadt/Lace			0.186667	8.81	4.74506	0.38	1.85667	0.913263	0.316253	192.84	39.2333	0.0671	0.785032		0.09	23.465	2.443	0.215	9.605	0.055	0.779832	0.137757	72.47	1.98667	5.51	0.850873		0.671882	681.709		2.07407	2.66096		16.7618	2.75699	0.287251	6.07975	15.3308	125.745	130.325	0.80252	10.7176			825.129
79	5,6	Aulbach and Viljoen, 2015; Aulbach et al. 2016	Kroonstadt/Lace			0.18	10.935	6.58735	0.055	1.66	0.911659	0.329347	206.332	0.510167	0.027125	1.52609		0.183333	23.05	2.28293	0.0633333	10.0967	0.0633333	0.687541	0.336791	79.3233	0.0864833	1.14589	1.47977		0.0172063	729.403		0.981818	2.60115		17.5953	2.79328	0.0595732	6.29916	11.1774	136.453	136.578	1.46838	2.44738			914.185
81	5,6	Aulbach and Viljoen, 2015; Aulbach et al. 2016	Kroonstadt/Lace			0.386667	4.03667	1.21221	0.463333	3.33	0.884958	0.172181	569.874	13.2933	0.194944	0.982427		0.33	22.86	2.286	0.29	10	0.08	0.781207	0.106522	261.05	0.1254	2.13667	1.00731		0.332068	2014.56		1.17172	2.18301		14.3448	2.05621	0.366749	6.97637	17.4259	398.641	405.331	0.960132	5.37422		-4.2245	916.005
84	5,6	Aulbach and Viljoen, 2015; Aulbach et al. 2016	Kroonstadt/Lace			0.183333	9.74	4.09244	0.116667	2.38	0.884788	0.324515	159.485	2.71967	0.0385667	1.004		0.11	23.08	2.2065	0.12	10.46	0.08	0.695617	0.303069	67.305	0.169667	0.918333	1.31329		0.244139	563.795		1.66667	2.36959		17.0369	2.50237	0.118211	6.80833	11.9606	108.509	109.886	1.20268	2.66122			1033.13
85	5,6	Aulbach and Viljoen, 2015; Aulbach et al. 2016	Kroonstadt/Lace			0.303333	8.08	2.48106	0.133333	3.25667	0.859686	0.32453	142.278	4.09778	0.0498222	0.999305		0.21	23.28	1.91763	0.1	12.14	0.1	0.725062	0.126333	37.6025	0.0835667	1.3375	1.02814		0.130645	502.966		1.44444	3.78373		16.4195	2.01901	0.114848	8.13244	14.896	84.5889	85.246	0.982284	3.47158		-4.80008	922.986
88	5,6	Aulbach and Viljoen, 2015; Aulbach et al. 2016	Kroonstadt/Lace			0.27	8.765	1.73564	0.07	5.05	0.770201	0.34977	370.307	2.38	0.0841333	0.872565		0.2	22.1733	1.18468	0.0833333	18.7167	0.0733333	0.513671	0.196199	123.149	0.12695	4.97111	0.916632		0.377661	1309.07		1.35	3.00698		16.0812	1.28425	0.0770438	12.5218	10.3334	233.438	238.382	0.877372	11.7285			906.163
94	5,6	Aulbach and Viljoen, 2015; Aulbach et al. 2016	Kroonstadt/Lace			0.236667	9.08333	3.0791	0.12	2.95	0.8672	0.351262	153.992	2.90889	0.0838222	0.985111		0.145	23.08	1.80101	0.11	12.815	0.08	0.703413	0.137199	39.855	0.0828667	1.49517	0.95257		0.194728	544.378		1.63218	3.86381		16.7502	2.00351	0.114276	8.3604	14.2134	91.028	92.0881	0.936496	4.78293			859.882
100	5,6	Aulbach and Viljoen, 2015; Aulbach et al. 2016	Kroonstadt/Lace			0.536667	6.84333	1.19708	0.136667	5.71667	0.776524	0.29064	225.088	8.24444	0.39	0.857041		0.39	22.57	1.4186	0.15	15.91	0.11	0.635188	0.112451	66.6667	0.130717	9.395	0.892196		0.351899	795.708		1.37607	3.37632		15.4412	1.3683	0.143496	11.2849	13.5146	137.443	140.243	0.840732	18.0277			976.905
101	5,6	Aulbach and Viljoen, 2015; Aulbach et al. 2016	Kroonstadt/Lace			0.273333	11.9733	4.41278	0.0666667	2.71333	0.84787	0.462825	228.846		0.0798384			0.21	22.95	1.83747	0.07	12.49	0.13	0.671307	0.224154	106.653	0.340333	3.19	1.12407		0.329981	808.992		1.30159	2.14569		17.9529	2.22591	0.0682745	8.06542	11.6504	161.086	163.756		7.89846			1032.09
103	5,6	Aulbach and Viljoen, 2015; Aulbach et al. 2016	Kroonstadt/Lace			0.23	7.215	1.924	0.0875	3.75	0.844646	0.283123	274.116	3.15833	0.0393333	1.0146		0.146667	22.6267	1.46546	0.0966667	15.44	0.0966667	0.635991	0.143161	83.6983	0.657667	3.53889	0.918768		0.513012	969.026		1.56818	3.27504		15.6149	1.54141	0.0920693	10.1303	13.4021	168.468	173.439	0.924238	7.78534			815.696
105	5,6	Aulbach and Viljoen, 2015; Aulbach et al. 2016	Kroonstadt/Lace			0.295	12.815	5.30642	0.05	2.415	0.856938	0.482762	160.29	1.76	0.03385	0.902846		0.22	22.96	1.87429	0.0566667	12.25	0.11	0.685377	0.215745	44.3222	0.291778	1.77	0.910937		0.473125	566.641		1.34091	3.61647		18.3101	2.3506	0.0534143	7.78956	11.8306	96.0237	98.7046	0.89513	6.96038			1013.41
106	5,6	Aulbach and Viljoen, 2015; Aulbach et al. 2016	Kroonstadt/Lace			0.275	8.93	2.88997	0.15	3.09	0.861806	0.342855	207.067	2.17444	0.0843333	0.944876		0.253333	22.9967	1.88291	0.0933333	12.2133	0.0866667	0.715016	0.150083	54.92	0.0579667	1.85	0.933044		0.460352	732.001		1.08553	3.77033		16.5932	2.05549	0.118273	8.07261	14.2546	122.783	126.153	0.906276	8.88703			940.22
122	5,6	Aulbach and Viljoen, 2015; Aulbach et al. 2016	Kroonstadt/Lace			0.26	13.3167	6.53846	0.15	2.03667	0.876562	0.488673	164.153	1.6449	0.0219724	0.973599		0.2	23.18	1.97697	0.1	11.725	0.1	0.68404	0.243187	55.5605	0.22601	2.71053	1.12281		0.174952	580.297		1.3	2.95449		18.7096	2.54441	0.122281	7.35321	11.4634	104.235	105.25	1.07986	5.62522			965.71
126	5,6	Aulbach and Viljoen, 2015; Aulbach et al. 2016	Kroonstadt/Lace			0.246667	8.02333	1.69986	0.113333	4.72	0.791638	0.333842	198.503	2.54567	0.119083	0.96001		na	na	na	na	na	na	na	na	28.6133	0.095	0.675667	1.04177		0.387213	701.729		na	6.93744		na	na	na	na	na	104.624	107.341	0.992002	3.44188			na
128	5,6	Aulbach and Viljoen, 2015; Aulbach et al. 2016	Kroonstadt/Lace			0.28	10.33	3.64374	0.045	2.835	0.860742	0.415718	132.741	2.43833	0.0166833	0.969586		0.245	22.44	1.8794	0.05	11.94	0.13	0.682977	0.225767	138.15	0.503231	6.16845	0.823013		0.765339	469.252		1.14286	0.960844		16.8651	2.16602	0.0473865	7.78621	12.2672	134.679	138.271	0.841822	13.1244		-3.31043	1007.31
129	5,6	Aulbach and Viljoen, 2015; Aulbach et al. 2016	Kroonstadt/Lace			0.256667	7.41	1.93136	0.16	3.83667	0.83677	0.316506	315.54	3.28083	0.109333	0.837859		0.2	22.405	1.53249	0.11	14.62	0.085	0.659356	0.122646	67.515	0.05775	1.75583	0.989619		0.23962	1115.47		1.28333	4.67363		15.6215	1.60297	0.132177	9.74539	13.664	178.667	181.34	0.852961	5.21182		-4.73865	846.597
132	5,6	Aulbach and Viljoen, 2015; Aulbach et al. 2016	Kroonstadt/Lace			0.19	4.73	0.981328	0.24	4.82	0.840701	0.180708	218.385	9.085	0.366	0.891816		0.2	22.375	1.80008	0.09	12.43	0.055	0.714198	0.133073	122.415		8.8525	0.962869		0.691265	772.013		0.95	1.78397		14.3411	1.60309	0.156359	8.94588	15.8957	164.424	169.76	0.901021	17.5			994.638
133	5,6	Aulbach and Viljoen, 2015; Aulbach et al. 2016	Kroonstadt/Lace			0.23	10.81	4.67965	0.06	2.31	0.878844	0.416934	238.501	8.4008	0.102719	0.99615		0.13	23.17	1.94502	0.04	11.9125	0.0975	0.727156	0.129251	103.233	0.143333	2.74667	0.971676		0.403968	843.123		1.76923	2.31031		17.5394	2.31921	0.048798	7.56265	13.9705	163.413	166.819	0.94082	7.17449			848.138
136	5,6	Aulbach and Viljoen, 2015; Aulbach et al. 2016	Kroonstadt/Lace			0.18	4.60667	0.791523	0.09	5.82	0.813202	0.192325	257.94	6.805	0.35575	0.938559		0.255	22.39	1.47935	0.06	15.135	0.07	0.653246	0.124704	117.365	0.236	7.12667	0.985314		0.569948	911.844		0.705882	2.19776		14.3106	1.31488	0.0730725	10.8835	15.1072	179.554	184.751	0.926705	14.7951			922.048
141	5,6	Aulbach and Viljoen, 2015; Aulbach et al. 2016	Kroonstadt/Lace			0.35	6.45	2.73305	0.75	2.36	0.905562	0.271661	265.007	3.97333	0.102333	1.08153		0.265	22.8	2.32653	0.63	9.8	0.105	0.773412	0.14252	127.997	0.159311	3.96641	0.989107		0.26613	936.825		1.32075	2.07041		15.4036	2.39341	0.682164	6.43582	15.9916	189.129	191.622	0.981201	9.34077			861.508
142	5,6	Aulbach and Viljoen, 2015; Aulbach et al. 2016	Kroonstadt/Lace			0.263333	5.06	0.931288	0.396667	5.43333	0.82065	0.2028	168.532	12.8826	0.171009	0.970659		0.21	21.93	1.37578	0.07	15.94	0.06	0.636681	0.112637	105.483	0.58	9.65333	0.730162		1.01706	595.778		1.25397	1.59771		14.2012	1.27901	0.214627	11.1033	14.7439	132.462	138.521	0.801316	19.2273			830.452
144	5,6	Aulbach and Viljoen, 2015; Aulbach et al. 2016	Kroonstadt/Lace			0.295	8.91	1.485	0.095	6	0.738489	0.37982	310.395	2.7475	0.202	0.986692		0.216667	22.0167	1.09264	0.08	20.15	0.09	0.517492	0.136447	77.0583	0.117883	9.73333	1.05744		0.138813	1097.28		1.36154	4.02805		16.0972	1.16949	0.0866285	13.7644	10.9301	181.791	183.314	1.00119	13.4905			880.284
145	5,6	Aulbach and Viljoen, 2015; Aulbach et al. 2016	Kroonstadt/Lace			0.246667	8.10667	2.70824	0.04	2.99333	0.872232	0.302581	171.045	2.314	0.033625	1.02721		0.2	22.9	1.81458	0.055	12.62	0.055	0.686322	0.19402	62.335	0.1036	1.4015	1.03514		0.136812	604.661		1.23333	2.74396		16.2218	1.95979	0.048185	8.27732	13.6596	111.095	111.922	1.00722	4.34502			910.425
146	5,6	Aulbach and Viljoen, 2015; Aulbach et al. 2016	Kroonstadt/Lace			0.443333	10.4867	3.47624	0.0633333	3.01667	0.850886	0.415638	230.742	11.2783	0.213333	0.737127		0.305	22.725	1.64079	0.045	13.85	0.12	0.677471	0.136107	107.542		6.78145	0.708324		0.763417	815.695		1.45355	2.1456		17.091	1.91805	0.0528365	8.91062	13.2223	161.691	167.918	0.694077	15.0706			864.055
147	5,6	Aulbach and Viljoen, 2015; Aulbach et al. 2016	Kroonstadt/Lace			0.27	6.235	1.16433	0.045	5.355	0.795142	0.268172	776.438	3.02087	0.0670037	0.963564		0.32	22.235	1.32984	0.045	16.72	0.095	0.617075	0.126385	157.882	0.0756	1.92833	1.0094		0.101643	2744.78		0.84375	4.91785		15.0205	1.29548	0.0449543	11.5945	13.5466	435.757	438.547	0.952445	5.36183			903.55
148	5,6	Aulbach and Viljoen, 2015; Aulbach et al. 2016	Kroonstadt/Lace			0.155	4.525	1.3078	0.155	3.46	0.877817	0.193947	185.09	9.04667	0.107	0.988296		0.2	22.89	1.94148	0.07	11.79	0.08	0.727192	0.140813	55.6967	0.100417	1.4625	1.04344		0.382636	654.312		0.775	3.32318		14.5733	1.81886	0.10782	8.01232	15.9113	113.463	115.967	0.984671	3.78845		-3.71763	878.112
151	5,6	Aulbach and Viljoen, 2015; Aulbach et al. 2016	Kroonstadt/Lace			0.323333	6.92667	1.02516	0.1	6.75667	0.721986	0.298604	442.098	4.60778	0.262444	0.839098		0.275	21.355	0.963021	0.095	22.175	0.125	0.446501	0.151924	143.905	0.1408	9.33667	0.853104		0.442534	1562.86		1.17576	3.07215		14.7997	0.975412	0.0968185	15.1727	9.90477	276.795	283.711	0.817091	18.8242		-3.88599	818.123
152	5,6	Aulbach and Viljoen, 2015; Aulbach et al. 2016	Kroonstadt/Lace			0.21	8.93	3.33832	0.075	2.675	0.875215	0.335508	196.284	1.66378	0.0494222	1.02801		0.15	22.555	1.88745	0.07	11.95	0.075	0.685031	0.225418	59.6908	0.111	1.07492	1.15646		0.0984177	693.885		1.4	3.28835		16.4083	2.112	0.0721786	7.76905	12.7429	121.032	121.715	1.09968	2.63042		-3.91908	946.828
153	5,6	Aulbach and Viljoen, 2015; Aulbach et al. 2016	Kroonstadt/Lace			0.32	10.0167	3.49013	0.06	2.87	0.859796	0.402821	226.41	1.692	0.0413	1.03698		0.21	22.47	1.77488	0.04	12.66	0.12	0.680119	0.193737	60.9167	0.105467	1.87667	1.01231		0.19458	800.382		1.52381	3.71672		16.8344	2.04316	0.0489027	8.23939	12.7237	135.109	136.667	0.994982	5.10572			948.877
155	5,6	Aulbach and Viljoen, 2015; Aulbach et al. 2016	Kroonstadt/Lace			0.2	8.07	1.91232	0.12	4.22	0.815013	0.324734	339.948	8.36943	0.0804564	0.758243		0.153333	22.0267	1.28336	0.0933333	17.1633	0.08	0.562649	0.190412	113.544	0.276955	4.26199	0.774542		0.823343	1201.75		1.30435	2.99398		15.6223	1.38855	0.104455	11.2508	11.4122	213.559	223.454	0.743137	9.47116			861.195
158	5,6	Aulbach and Viljoen, 2015; Aulbach et al. 2016	Kroonstadt/Lace			0.18	8.61	1.71514	0.06	5.02	0.79676	0.363425	287.74	6.67	0.3	1.11064		0.08	22.6633	1.37215	0.0266667	16.5167	0.0933333	0.636867	0.077006	62.2344	0.1468	5.47056	1.02757		0.807852	1017.19		2.25	4.62348		16.213	1.44037	0.0413166	11.2562	13.7953	162.298	170.516	1.04492	11.646			817.968
177	5,6	Aulbach and Viljoen, 2015; Aulbach et al. 2016	Kroonstadt/Lace			0.15	13.015	11.3668	0.13	1.145	0.930802	0.400853	204.122	6.44	0.0181	1.081		0.14	23.31	2.76512	0.1	8.43	0.04	0.752781	0.315727	67.21	1.196	1.66	1.15438		0.306408	721.591		1.07143	3.03707		18.6216	3.62494	0.113148	5.13708	11.7727	128.405	130.616	1.13034	3.54507			919.203
193	5,6	Aulbach and Viljoen, 2015; Aulbach et al. 2016	Kroonstadt/Lace			0.28	9.84333	3.3405	0.103333	2.94667	0.85839	0.365007	256.725	1.8445	0.0376	0.961684		0.255	22.93	1.76385	0.085	13	0.085	0.666964	0.208835	77.8417	0.111117	2.12	1.00909		0.153189	907.549		1.09804	3.29804		17.0159	2.01044	0.0931057	8.46379	12.5229	158.083	159.473	0.980884	4.94084			951.004
201	5,6	Aulbach and Viljoen, 2015; Aulbach et al. 2016	Kroonstadt/Lace			0.133333	12.5867	9.48744	0.0766667	1.32667	0.922348	0.435521	122.383	2.64331	0.0116507	1.07815		0.18	23.125	2.72379	0.07	8.49	0.085	0.745346	0.331427	104.003	1.471	1.735	0.909136		0.352655	432.638		0.740741	1.17673		18.3198	3.49002	0.0727414	5.24919	11.6048	111.875	113.401	0.915715	3.90346		-3.81295	972.023
207	5,6	Aulbach and Viljoen, 2015; Aulbach et al. 2016	Kroonstadt/Lace			0.136667	12.9	7.99587	0.0266667	1.61333	0.90291	0.453143	158.567	2.41111	0.0140278	1.08592		0.155	22.985	2.33114	0.03	9.86	0.09	0.703676	0.324018	63.8267	0.620667	0.958667	1.11923		0.330875	560.549		0.88172	2.48433		18.3874	2.99956	0.0284063	6.13002	10.9761	106.092	107.946	1.10541	2.69763			981.112
237	5,6	Aulbach and Viljoen, 2015; Aulbach et al. 2016	Kroonstadt/Lace			0.09	14.3	12.1186	0.0333333	1.18	0.920425	0.419019	130.304	0.622556	0.01225	1.11655		0.356667	23.1033	2.54349	0.0466667	9.08333	0.12	0.7309	0.313762	48.9833	0.5035	0.326333	1.21941		0.0820558	460.639		0.252336	2.66018		19.1265	3.4633	0.0406338	5.52262	11.0487	85.5043	85.8823	1.20354	1.22119			932.92
HRV-174A	7	Burness et al., 2020	Roberts Victor			0.335616	7.94299	1.6907	0.138714	4.69804	0.816538	0.333647	417.038	5.87725	0.118375	1.07033		0.275202	22.6928	1.51633	0.13	14.9655	0.13	0.643614	0.12349	63.12	0.25	4.56317	1.12713		0.377053	1474.27		1.21952	6.60706		15.9976	1.55195	0.133415	10.3081	13.5667	221.478	227.036	1.08559	8.9406		-3.8	884.713
HRV77bimin	8	Huang et al., 2012	Roberts Victor	BCR-2G: no concentrations reported		0.34765	7.61046	1.22847	0.187825	6.19509	0.769268	0.317341	385.28	4.89667	0.201	1.09612		0.246808	22.5249	1.30658	0.194354	17.2396	0.0913	0.60354	0.118229	95.05	0.159333	3.37	1.15394		0.112844	1362		1.40859	4.05345		15.7964	1.28884	0.1912	12.2563	13.2966	225.382	226.919	1.08492	6.04971			936.388
HRV77megaC	8	Huang et al., 2012	Roberts Victor			0.332753	9.82271	2.28708	0.245476	4.29488	0.805104	0.348237	289.892	0.6435		1.40711		0.288257	22.5136	1.32723	0.2386	16.9629	0.0956	0.569638	0.195302	95.4767	0.1	2.22	1.38673		0.0914002	1024.8		1.15436	3.03627		16.7879	1.49192	0.241473	11.2526	11.3959	182.788	183.724	1.35542	3.63991			912.539
RV07-01	8	Huang et al., 2012	Roberts Victor			0.380086	8.37901	1.82179	0.185121	4.59932	0.817614	0.342405	351.068	5.138	0.091	1.14843		0.316708	22.9172	1.47473	0.161854	15.54	0.109231	0.647868	0.119481	118.154	0.145625	2.265	1.1298		0.0478479	1241.06		1.20012	2.97128		16.3675	1.54238	0.172241	10.6119	14.0197	222.853	223.447	1.08688	4.28791			881.21
RV07-02	8	Huang et al., 2012	Roberts Victor			0.405008	6.9054	1.1397	0.137585	6.05898	0.781527	0.282596	420.404	6.328	0.1412	1.04254		0.354061	22.7168	1.31346	0.150474	17.2954	0.111248	0.605565	0.109467	137.963	0.107833	3.96833	1.04465		0.031475	1486.17		1.14389	3.04722		15.597	1.27475	0.144628	12.2353	13.6599	264.974	265.442	1.00665	7.20564			880.45
RV07-03	8	Huang et al., 2012	Roberts Victor			0.495562	6.00177	0.828566	0.0722	7.24356	0.743616	0.251026	576.3	12.1833	0.165333	1.08073		0.548732	21.7895	1.17675	0.0877421	18.5167	0.138547	0.568794	0.13303	265.565	0.455	5.915	1.07138		0.192917	2037.28		0.903104	2.17009		14.6582	1.09235	0.0805939	13.4189	12.8151	404.584	408.514	1.03832	10.5946			970.364
RV07-07	8	Huang et al., 2012	Roberts Victor			0.364038	8.46005	1.72538	0.10685	4.90329	0.809228	0.33151	327.228	4.436	0.0792	1.16163		0.263115	23.1697	1.47704	0.0862154	15.6867	0.109946	0.638341	0.120316	81.7644	0.118222	1.62911	1.29619		0.0210016	1156.78		1.38357	4.00208		16.5471	1.52761	0.0954807	10.832	13.7903	192.18	192.423	1.18892	3.45205			890.397
RV07-09a	8	Huang et al., 2012	Roberts Victor			0.315305	5.12382	0.693423	0.240379	7.38917	0.761113	0.218228	376.625	12.1075	0.18925	1.12233		0.315427	22.3994	1.28459	0.318413	17.4369	0.0956733	0.606093	0.092334	141.992	0.193833	4.54167	1.04076		0.206664	1331.41		0.999615	2.65244		14.5969	1.13244	0.28272	12.8898	14.1919	247.041	249.792	1.04313	7.95362			900.958
RV07-11	8	Huang et al., 2012	Roberts Victor			0.336205	7.76277	1.57464	0.10156	4.92986	0.813218	0.318073	305.882	4.6025	0.132	1.24655		0.285141	22.9827	1.47527	0.0993765	15.5786	0.0991941	0.642801	0.11631	103.935	0.103	1.7875	1.18072		0	1081.33		1.17908	2.94302		16.1337	1.49571	0.100359	10.7867	14.0682	194.811	194.811	1.16496	3.62974			877.335
RV07-12	8	Huang et al., 2012	Roberts Victor			0.165686	5.18631	0.814918	0.0954636	6.36421	0.771104	0.215665	430	0.417	0.0944	1.07297		0.152995	21.8974	1.03707	0.144638	21.1145	0.0407143	0.472398	0.176913	220.687	0.01655	5.79167	1.13944		0.755107	1520.09		1.08295	1.94846		14.2751	0.99318	0.121603	14.3731	11.1598	312.421	323.899	1.07836	13.2459			798.27
RV07-13	8	Huang et al., 2012	Roberts Victor			0.395526	6.74516	0.930546	0.159532	7.24861	0.752116	0.275908	417.163	5.96333	0.171333	1.11504		0.338883	22.5862	1.19281	0.123608	18.9353	0.114767	0.561055	0.108191	107.027	0.126667	3.52667	1.1084		0.171776	1474.71		1.16715	3.89775		15.4326	1.13027	0.139531	13.6538	12.9973	246.138	248.671	1.05564	7.39416			867.525
RV07-16	8	Huang et al., 2012	Roberts Victor			0.3585	13.798	5.43854	0.102833	2.53707	0.854216	0.467303	174.289	1.6875	0.065	1.29566		0.288267	23.3319	1.73368	0.0785722	13.4581	0.121289	0.6498	0.221714	50.1613	0.25	1.07487	1.33737		0.0585306	616.128		1.24364	3.47457		19.0308	2.22871	0.0894366	8.53894	11.4509	105.953	106.314	1.31199	3.38417			951.229
RV07-18	8	Huang et al., 2012	Roberts Victor			0.375	9.25097	2.12256	0.123759	4.35841	0.819106	0.368003	250.582	3.88667	0.10525	1.22794		0.270352	22.8833	1.50662	0.100662	15.1885	0.111219	0.653209	0.122237	84.198	0.137	2.806	1.11096		0.059611	885.831		1.38708	2.9761		16.7392	1.62372	0.110989	10.3091	13.8009	158.971	159.499	1.10821	5.56761			894.803
RV07-19	8	Huang et al., 2012	Roberts Victor			0.387694	12.4015	3.9281	0.105306	3.15713	0.836329	0.446446	311.047	2.34833	0.108	1.21306		0.277177	22.9865	1.60728	0.0811364	14.3015	0.12705	0.648619	0.173407	87.15	0.21475	1.44925	1.3363		0	1099.58		1.39872	3.5691		18.2233	1.96233	0.0920128	9.28653	12.2177	187.904	187.904	1.26806	3.21199			931.587
RV07-20	8	Huang et al., 2012	Roberts Victor			0.162368	3.07619	0.426859	0.033736	7.20658	0.785971	0.128432	478.733	10.35	0.209	1.0991		0.359686	22.2455	1.28939	0.0643682	17.2527	0.0717636	0.606768	0.113675	384.91	0.1985	5.265	0.989407		0.298003	1692.37		0.451416	1.24375		13.5816	1.06979	0.0504375	12.6955	14.8501	425.844	430.887	0.992509	9.4584			879.581
RV07-23a	8	Huang et al., 2012	Roberts Victor			0.375881	13.0819	4.14866	0.0685286	3.15329	0.826209	0.466097	310	2.125		1.28403		0.327495	22.8136	1.53225	0.0632364	14.8889	0.131609	0.60359	0.230351	113.552	0.4438	1.784	1.41656		0.0626992	1095.88		1.14774	2.73003		18.4231	1.91863	0.0655765	9.60222	10.7724	201.821	202.508	1.3718	3.31706			970.665
RV07-23b	8	Huang et al., 2012	Roberts Victor			0.40036	11.0618	3.0926	0.10242	3.57686	0.828342	0.426609	420	3.745		1.22921		0.338445	22.7751	1.52084	0.0849455	14.9753	0.126764	0.634633	0.165966	164.89	0.2716	2.82	1.31565		0.0425562	1484.74		1.18294	2.54715		17.4969	1.77777	0.0927691	9.84206	12.3777	279.565	280.197	1.27305	3.53944			915.062
RV07-25	8	Huang et al., 2012	Roberts Victor			0.412017	13.1621	3.79979	0.0522	3.46391	0.812241	0.490465	340	3.675	0.056	1.20085		0.404145	22.8372	1.4707	0.0442152	15.5282	0.160773	0.594661	0.210651	221.74	0.498333	6.14667	1.16174		0.243408	1201.93		1.01948	1.53333		18.4396	1.83003	0.047691	10.0761	10.7858	274.273	277.199	1.1411	10.9794			967.404
RV07-29a	8	Huang et al., 2012	Roberts Victor			0.362886	8.24847	1.95154	0.127057	4.22666	0.829767	0.335175	386.255	4.56		1.10516		0.3113	22.8919	1.56852	0.138214	14.5946	0.106814	0.655823	0.142291	130.195	0.1662	1.6135	1.22672		0.0505961	1365.45		1.16571	2.96674		16.2945	1.64189	0.133126	9.92425	13.7743	245.291	245.982	1.13876	2.98474			907.898
RV07-30	8	Huang et al., 2012	Roberts Victor			0.184464	9.12469	1.56851	0.0788455	5.81742	0.741562	0.347796	380	0.0209333	0.072	1.46226		0.103147	22.4101	1.23133	0.0794333	18.1999	0.0389867	0.530462	0.200382	109.709	0.044	4.26143	1.44502		0.0936177	1343.34		1.78836	3.46372		16.4169	1.30122	0.0790947	12.6166	10.5481	231.11	232.368	1.41922	7.4308			1030.31
RV07-31	8	Huang et al., 2012	Roberts Victor			0.18745	9.04873	1.69385	0.0620833	5.3421	0.76306	0.338058	470	0.01265	0.063	1.58765		0.13503	22.3187	1.245	0.049737	17.9266	0.0466667	0.502613	0.252647	163.591		4.25125	1.63907		0.119071	1661.5		1.38821	2.87301		16.3285	1.33297	0.0552263	12.2497	9.9204	301.098	303.076	1.57995	7.94714			994.022
RV07-33	8	Huang et al., 2012	Roberts Victor			0.188214	9.36443	1.55295	0.0394571	6.0301	0.727833	0.343058	450.189	0.0214333	0.099	1.23237		0.150446	21.9723	1.18275	0.0372458	18.5773	0.0504917	0.470311	0.274286	186.354		3.62	1.61232		0.0552143	1591.46		1.25104	2.41577		16.2901	1.26043	0.0382197	12.9242	9.15504	304.904	305.783	1.50283	6.98592			1054.49
RV07-34	8	Huang et al., 2012	Roberts Victor			0.254287	12.2881	2.29011	0.0171625	5.36575	0.718731	0.384947	540	0.0216	0.047	1.48059		0.17507	22.0541	1.25418	0.0377741	17.5845	0.0548111	0.427914	0.358174	268.142		4.56	1.39303		0.0149593	1908.95		1.45249	2.01386		17.6568	1.46113	0.0284948	12.0844	7.51836	390.418	390.703	1.38645	8.13016			1081.84
RV07-36	8	Huang et al., 2012	Roberts Victor			0.1255	4.88113	0.708498	0.0817	6.8894	0.764767	0.208264	319.553	0.238667	0.177	1.16647		0.120973	22.4487	1.1533	0.135773	19.4648	0.0300091	0.56343	0.107265	130.037		6.09333	1.15512		0.64527	1129.65		1.03742	2.45741		14.4551	1.05352	0.110738	13.7208	13.319	213.869	221.158	1.10874	12.3905			835.211
RV07-37	8	Huang et al., 2012	Roberts Victor			0.188011	9.14996	1.64092	0.0744778	5.57612	0.756039	0.360642	310	0.0264		1.33212		0.11	22.65	1.20415	0.08	18.81	0.04	0.52897	0.184365	96.8433		4.74	1.57388		0.158333	1095.88		1.70919	3.20105		16.5498	1.28938	0.0773927	12.8354	10.8627	192.442	194.177	1.42192	6.06429			954.346
RV07-41	8	Huang et al., 2012	Roberts Victor			0.221794	5.79276	0.875702	0.186556	6.61499	0.787511	0.241591	264.55	7.18	0.254333	1.31078		0.276529	23.0881	1.34954	0.204029	17.1082	0.0885429	0.629532	0.0771523	80.4233	0.1065	2.09333	1.39458		0.118777	935.211		0.802064	3.28947		15.288	1.23568	0.195934	12.3721	15.1407	163.075	164.186	1.28717	4.2247			831.102
RV07-66	8	Huang et al., 2012	Roberts Victor			0.152612	4.64267	0.984265	0.141348	4.71688	0.837076	0.172557	460	0.15525		1.26884		0.0811137	22.8042	1.2963	0.146068	17.5918	0.0334611	0.600123	0.109424	196.77		4.19	1.38208		0.0814482	1626.15		1.88146	2.33775		14.6203	1.24017	0.143827	11.789	14.252	314.956	316.281	1.28748	4.63789			706.925
RV73-12	8	Huang et al., 2012	Roberts Victor			0.167579	5.60793	0.787824	0.218388	7.11826	0.749336	0.238496	390	0.08646	0.1802	1.20537		0.129467	22.2779	1.07821	0.242833	20.6619	0.0516333	0.536033	0.0877597	159.433	0.06055	5.91889	1.30008		0.183402	1378.69		1.29438	2.44616		14.7508	1.01438	0.23141	14.5418	12.7138	262.684	265.213	1.19561	11.0725			774.884
RVF-5	8	Huang et al., 2012	Roberts Victor			0.28955	5.7252	0.943782	0.17825	6.06623	0.799204	0.216437	393.407	8.75	0.163333	1.06825		0.270717	22.8221	1.38131	0.168567	16.5221	0.1148	0.634353	0.102155	100.613	0.146267	2.37	1.16802		0.302223	1390.73		1.06957	3.91008		15.0854	1.28028	0.1724	11.7828	14.8943	231.624	235.827	1.07484	6.32999			870.354
RVF-6	8	Huang et al., 2012	Roberts Victor			0.337067	4.97363	0.622534	0.185967	7.98933	0.736254	0.186208	424.32	2.3355	0.147	1.05422		0.3244	22.0538	1.04527	0.2115	21.0987	0.0964667	0.497684	0.133	209.48	0.0505	4.89	1.0383		0.565365	1500.01		1.03905	2.02559		14.2913	0.945364	0.198886	15.1173	12.0113	304.366	312.847	1.01209	11.6474			839.852
RVF-7	8	Huang et al., 2012	Roberts Victor			0.40488	8.43184	1.17534	0.09838	7.17394	0.722482	0.337088	415.283	3.79667	0.116	1.03634		0.30752	22.2907	1.08515	0.06098	20.5417	0.14202	0.515867	0.121849	135.383	0.147033	3.64	1.12462		0	1468.07		1.3166	3.06746		16.0542	1.10519	0.07781	14.5262	11.468	261.338	261.338	1.04639	7.08253			885.374
RVF-8	8	Huang et al., 2012	Roberts Victor			0.356225	8.57205	1.55325	0.238	5.5188	0.780891	0.320665	338.425	4.195	0.093	1.13083		0.258375	22.6081	1.24804	0.193325	18.1149	0.111175	0.574309	0.137432	104.095	0.16145	2.66	1.0967		0.0750434	1196.37		1.37871	3.25112		16.2802	1.30893	0.213267	12.4378	12.4963	209.377	210.275	1.07927	5.77521			880.799
13-64-102c	9,10	Schulze et al., 2000; Jacob et al., 2003	Roberts Victor	BCR-2G: no concentrations reported		0.34	13.27	6.14352	0.06	2.16	0.883171	0.384097	167	1.74	0.034	1.36325		0.26	23.38	1.91326	0.05	12.22	0.1	0.682266	0.216752	47.4	0.253	1.04	1.27141		0.0344748	590.362		1.30769	3.52321		18.8242	2.44771	0.054481	7.69052	12.2139	101.183	101.387	1.27932				892.04
13-64-103	9,10	Schulze et al., 2000; Jacob et al., 2003	Roberts Victor			0.21	15.72	8.31746	0.05	1.89	0.877573	0.433408	129	1.48	0.064	2.12322		0.24	23.4	2.0708	0.01	11.3	0.08	0.672722	0.293044	35.6	0.398	0.748	2.13991		0.0530835	456.028		0.875	3.6236		19.9336	2.82266	0.0279841	7.062	10.581	77.5863	77.8284	2.11273	1.65529			1002.46
RV159	11	Radu et al., 2019	Roberts Victor	BCR-2G: no concentrations reported		0.169	6.633	1.95376	0.235	3.395	0.874193	0.272514	209.12	40.39	0.0455	1.15917		0.093	23.934	1.95795	0.135	12.224	0.045	0.724639	0.0855389	44.72	0.224	1.025	1.17396		0.460835	739.26		1.8172	4.67621		16.0781	1.95718	0.179147	8.21496	15.8085	118.115	121.522	1.11347	2.63159			760.18
RV197	11	Radu et al., 2019	Roberts Victor			0.2642	11.1034	4.3354	0.0743	2.5611	0.872096	0.407624	78.11	4.31	0.0063	2.93868		0.1521	22.7352	1.42056	0.0615	16.0044	0.0878	0.627465	0.136377	18.88	0.0831	0.49	2.74045		0	276.127		1.73702	4.13718		17.5009	1.75802	0.06726	9.95492	12.7253	45.5335	45.5335	2.70886	1.00531			698.222
RV203	11	Radu et al., 2019	Roberts Victor			0.068	5.7055	0.861897	0.081	6.6197	0.761812	0.243439	405.19	0.01254	0.1381	1.09149		0.0976	22.0268	1.01879	0.0566	21.6205	0.0197	0.512399	0.0929291	137.54		4.13	1.13581		0.231482	1432.39		0.696721	2.94598		14.6501	0.987374	0.0674207	14.8375	12.3263	257.354	260.67	1.06363	8.13171			717.102
RV218	11	Radu et al., 2019	Roberts Victor			0.351	17.1192	8.4883	0.1235	2.0168	0.838841	0.544724	161.96	1.213	0.0058	1.37813		0.3471	22.4859	1.68699	0.0667	13.329	0.1125	0.57899	0.342884	67.33	0.784	1.44	1.52584		0.159842	572.545		1.01124	2.40547		20.0392	2.43601	0.092108	8.22625	8.29279	109.73	110.645	1.5062	3.68195			1015.77
RV220	11	Radu et al., 2019	Roberts Victor			0.2249	10.3341	1.72979	0.055	5.9742	0.715898	0.377375	574.3	0.00953	0.0542	1.06914		0.2178	21.4442	1.12712	0.0684	19.0256	0.0132	0.425083	0.30832	206.72		9	1.08272		0.125092	2030.21		1.0326	2.77815		16.4248	1.25028	0.0622928	13.1368	8.13035	371.643	374.182	1.06431	15.2582			1032
RV221	11	Radu et al., 2019	Roberts Victor			0.167	9.521	1.6498	b.d.	5.771	0.741656	0.352556	557.72	0.01435	0.0748	0.987865		0.2076	21.3758	1.08155	0.0573	19.7641	0.0187	0.431413	0.272503	208.04	0.00161	8.53	0.976741		0.365776	1971.6		0.804432	2.68083		15.9846	1.19106		13.4205	8.77674	363.996	371.207	0.956804	16.2457			938.271
RV226	11	Radu et al., 2019	Roberts Victor			0.4361	5.0609	0.751611	0.1421	6.7334	0.77546	0.215721	437.12	9.07	0.2187	0.957232		0.4132	22.0327	1.21153	0.1454	18.1858	0.0923	0.581731	0.107646	153.55	0.1435	4.38	0.980417		0.190283	1545.26		1.05542	2.84676		14.3696	1.10463	0.143641	13.0085	13.6482	280.595	283.535	0.932979	8.49686			843.255
RV233	11	Radu et al., 2019	Roberts Victor			0.224	8.91	1.76681	0.078	5.043	0.775866	0.333854	451.783	0.0705031	0.0596564	0.967476		0.158	22.278	1.29599	0.096	17.19	0.054	0.515055	0.242796	168.227	0.0047093	10.3919	0.998468		0.3952	1597.1		1.41772	2.68556		16.2008	1.38706	0.0875562	11.6799	10.0004	294.602	300.914	0.963318	19.0401			968.273
RV236	11	Radu et al., 2019	Roberts Victor			0.1986	17.606	4.66162	0.112	3.7768	0.720225	0.490743	257.5		0.0257	1.44356		0.1407	21.9728	1.40656	0.1345	15.6217	0.0401	0.489751	0.361651	103.4		4.52	1.54256		0	910.288		1.41151	2.49033		20.0077	1.9441	0.124375	10.2915	7.08066	172.745	172.745	1.51889	7.89905			1227.09
RV315	11	Radu et al., 2019	Roberts Victor			0.339	6.179	0.761429	0.133	8.115	0.712955	0.26545	371.04	4.87	0.1869	0.984334		0.283	22.013	1.12409	0.013	19.583	0.1	0.529212	0.113935	142.54	0.1082	3.81	1.02251		0.0666021	1311.66		1.19788	2.60306		14.8783	1.03227	0.0669514	14.4132	11.8722	245.194	246.068	0.972443	6.92376			920.609
RV344	11	Radu et al., 2019	Roberts Victor			0.304	20.417	11.509	n.a.	1.774	0.828983	0.526166	246.4	0.0461	0.0171	1.10716		0.187	22.406	1.68453	0.073	13.301	0.072	0.479796	0.457189	153.52	0.0333	3.37	1.13066		0.1199	871.049		1.62567	1.605		21.4853	2.65093		8.10481	5.94888	195.076	196.121	1.12333	7.15713			942.669
RV347	11	Radu et al., 2019	Roberts Victor			0.0403	6.222	2.23523	0.1376	2.7836	0.899615	0.234803	354.03	0.308	0.0358	1.76901		0.1159	22.9789	2.10241	0.1468	10.9298	0.0276	0.752605	0.126678	134.34	0.00391	1.676	1.63722		0.0144305	1251.53		0.347714	2.63533		15.4362	2.12531	0.142639	7.26302	16.5538	233.165	233.346	1.61608	3.18602			805.81
RV350	11	Radu et al., 2019	Roberts Victor			0.4073	7.3547	1.60762	0.1571	4.5749	0.81898	0.274183	305.32	3.5	0.1113	0.979797		0.2701	22.4876	1.3943	0.1919	16.1282	0.0949	0.610744	0.15236	100.8	0.0985	3.58	0.951293		0.58053	1079.34		1.50796	3.02897		15.5912	1.43445	0.175227	10.8691	12.9578	191.655	197.921	0.933323	8.30171			869.355
RV353	11	Radu et al., 2019	Roberts Victor			0.0789	9.3221	5.669	0.1676	1.6444	0.926518	0.284433	181.26	0.01575	0.00694	1.83746		0.0599	22.8824	2.09534	0.1772	10.9206	0.0358	0.701596	0.261934	89.3	0.00103	1.001	1.49162		0.0203042	640.772		1.3172	2.02979		16.777	2.48731	0.172845	6.74503	13.1535	130.655	130.785	1.51567	1.99446			785.716
RV357	11	Radu et al., 2019	Roberts Victor			0.4141	15.1545	6.39997	0.2033	2.3679	0.831095	0.481487	264.69	2.846	0.0194	1.10819		0.2969	22.1931	1.49033	0.1812	14.8914	0.1118	0.549984	0.311554	102.24	1.025	2.141	1.07739		0.748571	935.706		1.39475	2.58891		18.8859	2.05478	0.189706	9.19123	8.49379	173.969	180.974	1.07108	6.11995			955.479
RV366	11	Radu et al., 2019	Roberts Victor			0.338	4.794	0.748595	0.42	6.404	0.790969	0.201782	477.93	4.46	0.367	0.935475		0.436	22.128	1.49392	0.526	14.812	0.075	0.654821	0.109514	195.18	0.0721	6.37	0.890164		0.0570037	1689.53		0.775229	2.44866		14.32	1.29918	0.47803	11.0224	14.7786	322.226	323.189	0.888373	10.1596			969.416
RV370	11	Radu et al., 2019	Roberts Victor			0.431	4.941	0.842886	0.027	5.862	0.802322	0.193243	420.28	13.24	0.2451	0.959467		0.406	22.441	1.51434	0.06	14.819	0.091	0.646657	0.128219	159.81	0.1474	5.18	0.985748		0.503204	1485.73		1.06158	2.62987		14.4971	1.35029	0.0449311	10.7363	14.302	275.562	283.038	0.92556	11.9726			953.745
RV380	11	Radu et al., 2019	Roberts Victor			0.3243	14.3499	7.9514	0.0888	1.8047	0.889714	0.450028	13.7163	0.918		2.08358		0.287	23.1602	2.05633	0.0798	11.2629	0.0488	0.709343	0.224749	51.54	0.2629	0.623	2.1202		0	48.4886		1.12997	0.26613		19.1956	2.7396	0.08385	7.00671	12.1561	34.5194	34.5194	2.0917				933.815
RV398	11	Radu et al., 2019	Roberts Victor			0.2513	11.9202	2.8273	0.0238	4.2161	0.776435	0.394633	369.65	0.01632	0.0273	1.07084		0.0997	21.9756	1.26199	0.0228	17.4134	0.068	0.453594	0.333228	174.84	0.00303	6.57	1.07202		0.103449	1306.75		2.52056	2.11422		17.4331	1.52076	0.0232259	11.4634	8.14802	262.223	263.575	1.05762	11.2724			960.003
RV451	11	Radu et al., 2019	Roberts Victor			0.0376	15.9559	13.2944	0.0479	1.2002	0.920661	0.449303	174.48	0.00118				b.d.	22.8701	2.83967	0	8.0538	0.0359	0.7206	0.420385	81.63	0.00256	0.303	1.53443		na	616.804		na	2.13745													992.319
RV461	11	Radu et al., 2019	Roberts Victor			0.3612	7.7291	1.72482	1.0025	4.4811	0.825013	0.324813	220.08	2.98	0.0599	1.36226		0.2137	22.0259	1.479	0.7672	14.8924	0.073	0.66871	0.0988388	225.71	0.0726	4.53	1.43676		0.325238	778.005		1.69022	0.975056		15.544	1.52754	0.870207	10.1758	14.5615	222.452	224.982	1.3854	9.45631			852.561
RV469	11	Radu et al., 2019	Roberts Victor			0.1571	10.0149	1.69339	0.0355	5.9141	0.721721	0.399314	297.78		0.036	1.38673		0.1714	21.8868	1.11282	0.0962	19.6678	0.0341	0.472423	0.230692	173.79	b.d.	6.07	1.34224		0.0496691	1052.68		0.916569	1.71345		16.5365	1.22745	0.0688523	13.4723	9.30132	229.468	229.991	1.32649	10.5587			1010.3
RV483	11	Radu et al., 2019	Roberts Victor			0.483	8.912	1.70565	0.103	5.225	0.773188	0.373336	395.14	4.62	0.137	1.08297		0.313	22.529	1.31772	0.163	17.097	0.159	0.574375	0.149874	104.23	0.0889	4.15	1.10801		0.350275	1396.86		1.54313	3.79104		16.3463	1.39527	0.135534	11.7155	11.5749	234.265	239.158	1.07103	9.1162			931.058
RV486	11	Radu et al., 2019	Roberts Victor			0.415	7.716	1.54598	0.123	4.991	0.805766	0.318272	482.56	8.95	0.2126	0.974066		0.294	23.098	1.55553	0.164	14.849	0.097	0.647736	0.126344	135.73	0.463	5.38	1.14517		0.279655	1705.9		1.41156	3.55529		16.133	1.55347	0.145149	10.3852	13.6134	290.939	295.71	0.993001	10.0087			939.407
RV503	11	Radu et al., 2019	Roberts Victor			0.3357	16.9336	9.31646	0.0362	1.8176	0.863561	0.534258	163.4	1.15	0.0085	1.50238		0.2894	23.1057	1.99704	0	11.57	0.0566	0.681353	0.262834	48.37	0.222	0.629	2.45579		0	577.635		1.15999	3.37813		20.3283	2.83067	na	7.18142	10.5373	100.133	100.133	2.26782				1047.83
RV513	11	Radu et al., 2019	Roberts Victor			0.267	4.403	1.27071	0.209	3.465	0.885293	0.182614	420.24	16.77	0.1062	1.00772		0.244	23.772	2.65579	0.242	8.951	0.071	0.80193	0.0963572	157.83	0.0715	1.934	1.09031		0.354326	1485.59		1.09426	2.66261		15.006	2.32281	0.226351	6.4603	17.8698	274.89	280.154	0.992631	4.52214			961.555
DGE-1	12	Smart et al., 2021b	Bellsbank	BCR-2G: m 406 ppm/a 425±18 ppm		0.424444	4.83111	0.966437	0.0777778	4.99889	0.834955	0.194698	506.489	11.8333	0.385667			0.35875	22.7725	1.65709	0.0775	13.7425	0.09625	0.697207	0.0972554	179.722	0.125444	6.11111	0.995976		0.309057	1790.49		1.18312	2.81818		14.6562	1.49876	0.0773851	9.77891	16.0978	325.707	331.24	0.950232	11.2385		-4	881.004
DGE-2	12	Smart et al., 2021b	Bellsbank			0.168182	8.39909	2.42049	0.136364	3.47	0.848355	0.309464	724.478	4.01222	0.105222			0.135236	22.7506	1.83512	0.0618527	12.3974	0.0470329	0.630366	0.315513	263.833	0.286333	16.5278	1.01426		0.248367	2561.1		1.24362	2.74597		16.2537	1.94415	0.0951364	8.36035	11.3954	469.896	476.257	0.962121	27.0889		-2.3	1060.06
DGE-4	12	Smart et al., 2021b	Bellsbank			0.16	8.14444	2.45069	0.0522222	3.32333	0.857841	0.283506	918.9	2.82022	0.130667			0.115	22.4275	1.43997	0.05	15.575	0.0475	0.564655	0.270672	329.275	0.153875	12.59	1.19619		0.22229	3248.4		1.3913	2.79068		15.9661	1.59014	0.0508864	10.0407	11.2703	593.219	600.44	1.16664	20.9362		-2.3	848.713
DGE-5	12	Smart et al., 2021b	Bellsbank			0.245556	13.84	5.33219	0.0577778	2.59556	0.8401	0.485228	717.844	1.58778	0.0146667			0.173333	22.4011	1.63273	0.0544444	13.72	0.0733333	0.538938	0.385811	271.213	0.508125	6.045	1.13581		0.416742	2537.65		1.41667	2.6468		18.4731	2.12824	0.0557106	8.68	8.35598	470.136	480.711	1.12471	12.1693		-1.6	971.339
DGE-6	12	Smart et al., 2021b	Bellsbank			0.22	6.3	1.57303	0.295	4.005	0.844266	0.222846	879.133	10.6378	0.0261111			0.171178	22.5906	1.67737	0.0754048	13.4679	0.0538043	0.616983	0.283156	329.267	0.341444	4.45333	1.58147		0.341521	3107.82		1.28521	2.66997		15.2105	1.65696	0.17359	9.17976	12.1331	574.643	585.257	1.50071	9.16844		-2.5	1007.96
DGE-8	12	Smart et al., 2021b	Bellsbank			0.21	9.1925	2.40641	0.04625	3.82	0.824983	0.341719	748.764	5.39	0.103909			0.152	22.042	1.20712	0.042	18.26	0.052	0.467414	0.282646	249.417	0.401167	10.3442	0.985877		0.451883	2646.95		1.38158	3.00206		16.1892	1.38226	0.0437131	11.7121	9.44693	471.868	483.829	0.959421	19.3521		-2.5	808.366
DGO-11	12	Smart et al., 2021b	Bobbejahn/Bellsbank			0.19	10.972	5.10088	0.122	2.151	0.891219	0.380059	319.387	2.73225	0.002875			0.115	22.8862	1.89417	0.10125	12.0825	0.045	0.657814	0.28712	83.8	0.269889	2.49	2.08987		0.0278349	1129.07		1.65217	3.81131		17.5201	2.30184	0.110556	7.61134	11.612	189.758	190.073	2.05097	4.38647		-3.2	903.605
DGO-12	12	Smart et al., 2021b	Bobbejahn/Bellsbank			0.121667	8.45833	2.27476	0.0116667	3.71833	0.836901	0.302418	1047.22	10.06	0.0917778			0.172321	22.5654	1.65627	0.076477	13.6242	0.054558	0.617984	0.273445	294.475	0.625	12.2513	1.17837		0.488543	3702.04		0.706048	3.55623		16.1414	1.76908	0.0470971	9.12419	11.5603	629.934	648.02	1.10362	23.4024		-2.4	1025.64
DGO-13	12	Smart et al., 2021b	Bobbejahn/Bellsbank			0.122	16.3343	13.9213	0.0175	1.17333	0.910372	0.564127	164.4	1.26889	0			0.09	22.981	2.29925	0.015	9.995	0.04	0.69155	0.347315	44.6333	0.525556	0.78	2.45652		0.0233472	581.17		1.35556	3.68335		19.9854	3.31766	0.0161212	6.02395	9.92035	98.5039	98.6396	2.49333	1.20026		-2.5	937.958
DGO-16	12	Smart et al., 2021b	Bobbejahn/Bellsbank			0.185	13.6962	8.14647	0.23	1.68125	0.896464	0.483246	661.756	1.00744	0.00111111			0.13875	22.6325	1.83892	0.1825	12.3075	0.05625	0.616308	0.347893	180.667	0.245167	1.09833	1.6181		0.0214304	2339.37		1.33333	3.66285		18.6073	2.473	0.203831	7.52419	9.77225	397.066	397.568	1.64712	2.93786		-2.4	868.538
DGO-17	12	Smart et al., 2021b	Bobbejahn/Bellsbank			0.134444	16.3244	13.718	0.0222222	1.19	0.908452	0.576735	287.867	1.919	0.00666667			0.0888889	22.9533	2.29304	0.0188889	10.01	0.0366667	0.687992	0.351998	40.4233	0.390556	0.561333	2.25793		0.000725553	1017.64		1.5125	7.1213		19.9702	3.3058	0.0203887	6.04096	9.79115	151.772	151.779	2.33179	0.895031		-1.9	944.805
DGO-18	12	Smart et al., 2021b	Bobbejahn/Bellsbank			0.185833	8.92167	2.92834	0.0391667	3.04667	0.862886	0.323322	631.089	2.85389	0.0351111			0.172321	22.5654	1.65627	0.076477	13.6242	0.054558	0.617984	0.273445	177.222	0.204778	5.08222	1.63037		0.128053	2230.96		1.07842	3.561		16.4055	1.85297	0.0596133	8.85363	11.6254	380.945	383.802	1.5663	9.64567		-2.5	926.918
DGO-2	12	Smart et al., 2021b	Bobbejahn/Bellsbank			0.2425	14.7512	8.94693	0.015	1.64875	0.893991	0.507256	199.35	0.9865	0.276667			0.146667	23.0742	1.97299	0.01	11.695	0.0608333	0.65152	0.32212	65.8222	0.244444	0.872222	1.96585		0.111423	704.722		1.65341	3.02861		19.3078	2.69408	0.0122361	7.16675	10.245	125.762	126.547	2.02842	2.61809		-2.9	916.718
DGO-3	12	Smart et al., 2021b	Bobbejahn/Bellsbank			0.128333	16.1283	15.4832	0.025	1.04167	0.92239	0.546448	227.056	0.52	0			0.105	22.9967	2.37692	0.0166667	9.675	0.0433333	0.70018	0.354094	63.29	0.169667	0.743333	2.51319		0.0100849	802.664		1.22222	3.58754		19.9039	3.43796	0.0204146	5.78946	10.0955	136.97	137.051		0.857634		-2	895.795
DGO-4	12	Smart et al., 2021b	Bobbejahn/Bellsbank			0.225455	17.3327	15.4006	0.0727273	1.12545	0.906698	0.571247	703.329	0.772286	0.0141429			0.173636	22.7182	2.13608	0.0645455	10.6355	0.06	0.630403	0.414335	300.956	0.407	7.07444	1.30413		0.104731	2486.34		1.29843	2.33698		20.2738	3.19282	0.0681554	6.3498	8.34941	481.498	484.101	1.27077	12.2675		-2.6	891.8
DGO-5	12	Smart et al., 2021b	Bobbejahn/Bellsbank			0.288333	10.3467	4.30812	0.115	2.40167	0.883526	0.362912	884.775	3.705	0.0646667			0.155	22.7483	1.73255	0.0866667	13.13	0.055	0.627288	0.280835	232.275	0.30875	4.1	1.88542		0.0728662	3127.77		1.86022	3.80917		17.1555	2.06778	0.0993432	8.29659	11.4089	525.493	527.772	1.79234	7.76047		-3.2	873.209
DGO-6	12	Smart et al., 2021b	Bobbejahn/Bellsbank			0.192	10.22	3.82199	0.03	2.674	0.871218	0.340633	593.938	3.04875	0.007625			0.116667	22.495	1.57106	0.0216667	14.3183	0.0433333	0.623438	0.231526	138.356	0.255889	3.73556	1.51583		0.120755	2099.63		1.64571	4.29283		16.9515	1.86935	0.0253855	9.06812	11.8665	342.925	345.461	1.4858	7.6289		-3.2	849.982
DGO-8	12	Smart et al., 2021b	Bobbejahn/Bellsbank			0.294286	5.83429	1.26596	0.22	4.60857	0.827493	0.197813	542.256	7.91778	0.157222			0.14375	22.675	1.42666	0.18625	15.8938	0.04375	0.632059	0.129705	124.557	0.0828571	6.15429	1.29902		0.258776	1916.93		2.0472	4.35347		15.0598	1.39586	0.200912	10.7889	13.9687	311.659	316.619	1.11344	13.07		-3.1	836.932
DGO-9	12	Smart et al., 2021b	Bobbejahn/Bellsbank			0.102222	10.7533	3.64245	0.06	2.95222	0.851208	0.398699	1031.92	1.26475	0.0496667			0.08375	22.54	1.64391	0.05625	13.7113	0.0325	0.568407	0.343947	355.158	0.261167	15.3608	1.13389		0.203407	3647.93		1.22056	2.90551		17.2021	1.94314	0.0578193	8.85274	9.81506	658.289	665.709	1.07629	24.529		-1.9	953.205
Zimbabwe craton in NE Botswana
OE1	13,14	Aulbach et al., 2017, 2020	Orapa	BIR-1G: m 328±10 ppm/a 326±26 ppm		0.356333	7.867	2.02323	0.0476667	3.88833	0.853204	0.260799	203.003	4.83222	0.0481111	1.14256		0.650667	22.1027	2.13628	0.0623333	10.3463	0.178667	0.728668	0.240238	131.452	0.725667	1.32667	1.21294		0	717.637		0.547643	1.54432		15.6966	2.10969	0.0557333	7.44023	14.2779	163.65	163.65	1.17943	3.60985			1204.24
OE13	13,14	Aulbach et al., 2017, 2020	Orapa			0.354667	6.547	1.55968	0.209	4.19767	0.840519	0.241937	355.325	18.7733	0.141833	1.04049		0.146667	22.5817	1.28869	0.168	17.523	0.0466667	0.585242	0.140331	61.261	0.154795	5.32123	1.10964		0.444529	1256.11		2.41818	5.80018		15.3013	1.33306	0.185612	11.4783	13.1553	192.664	198.248	1.02181	9.27899			734.601
OE16	13,14	Aulbach et al., 2017, 2020	Orapa			0.348	8.422	1.81574	0.0593333	4.63833	0.803503	0.310903	454.951	9.32714	0.0722857	1.04357		0.159333	22.1783	1.13191	0.043	19.5937	0.057	0.496357	0.193129	101.056	0.209889	4.36778	1.10525		0.515246	1608.3		2.1841	4.50199		15.9091	1.24277	0.0500864	12.8013	10.6906	258.876	267.163	1.03905	8.89991		-3.15	785.682
OE17	13,14	Aulbach et al., 2017, 2020	Orapa			0.351667	9.495	1.79625	0.041	5.286	0.76307	0.3586	447.4	0.88875	0.086625	0.99648		0.247667	22.0143	1.08292	0.0506667	20.3287	0.0786667	0.454233	0.219455	137.403	0.110829	4.75429	0.963993		0	1581.6		1.41992	3.25612		16.3806	1.20806	0.0463167	13.5595	9.51788	276.902	276.902	0.944778	8.7594			854.206
OE18	13,14	Aulbach et al., 2017, 2020	Orapa			0.325	8.34633	1.47358	0.068	5.664	0.763206	0.321697	404.789	1.38711	0.0932222	1.04001		0.272667	21.8073	1.08806	0.0616667	20.0423	0.0983333	0.452559	0.2314	134.476	0.0909667	4.60889	1.00755		0.100533	1430.97		1.19193	3.01013		15.7347	1.16045	0.0644515	13.5592	9.7107	255.845	257.284	0.991218	9.61192		-3.5	868.578
OE19	13,14	Aulbach et al., 2017, 2020	Orapa			0.378667	6.011	1.41324	0.204667	4.25333	0.846145	0.226471	332.173	33.33	0.124667	1.05287		0.109	22.7983	1.40488	0.173667	16.228	0.038	0.637898	0.0990115	49.7578	0.155233	2.78556	1.07449		0.554115	1174.27		3.47401	6.67581		15.1642	1.40635	0.186568	10.7827	14.6448	175.787	182.293	1.01338	6.36133			719.89
OE2	13,14	Aulbach et al., 2017, 2020	Orapa			0.367667	8.606	2.44211	0.0746667	3.524	0.849367	0.299951	401.537	22.1222	0.0736667	1.01097		0.100333	22.5363	1.28495	0.0633333	17.5387	0.0433333	0.559096	0.183081	65.3156	0.311333	4.58889	1.13121		0.493844	1419.47		3.66445	6.14764		16.1908	1.44818	0.0680926	11.1801	11.8198	215.462	222.472	1.03113	9.4122			744.042
OE23	13,14	Aulbach et al., 2017, 2020	Orapa			0.467	8.50167	1.76591	0.0666667	4.81433	0.808825	0.273772	252.401	3.55375	0.07	1.17551		0.993667	21.275	1.7586	0.0713333	12.0977	0.222333	0.641667	0.315831	189.738	0.849098	2.23991	1.23691		0	892.264		0.469977	1.33026		15.527	1.7604	0.0692333	8.82017	11.8258	217.937	217.937	1.21037	5.98173		-1.31	1258.95
OE26	13,14	Aulbach et al., 2017, 2020	Orapa			0.344333	8.03	2.10008	0.0573333	3.82367	0.854244	0.264573	202.618	5.02333	0.0458667	1.15967		0.647667	22.0093	2.14641	0.0696667	10.254	0.172333	0.728686	0.242045	128.631	0.733451	1.3519	1.16482		0	716.274		0.531652	1.57519		15.7186	2.13558	0.0641167	7.36035	14.1542	161.925	161.925	1.14545	3.65684			1201.69
OE33	13,14	Aulbach et al., 2017, 2020	Orapa			0.366667	7.86867	2.05914	0.0593333	3.82133	0.855186	0.26633	200.502	5.16778	0.0517222	1.15193		0.606667	22.2127	2.19493	0.058	10.12	0.16	0.731084	0.25008	132.062	0.706778	1.26756	1.17788		0.0114023	708.795		0.604396	1.51824		15.7562	2.16288	0.0585933	7.28481	14.1838	162.841	162.922	1.1523	3.61661			1218.99
OE34	13,14	Aulbach et al., 2017, 2020	Orapa			0.360333	8.00967	2.08531	0.0366667	3.841	0.855168	0.266375	197.96	5.12667	0.0435333	1.14652		0.628667	22.2303	2.18716	0.0583333	10.164	0.174667	0.733757	0.239839	130.066	0.657375	1.22875	1.20048		0	699.808		0.573171	1.52199		15.831	2.16311	0.0485833	7.31865	14.3679	160.618	160.618	1.16675	3.45753		-2.23	1210.68
OE37	13,14	Aulbach et al., 2017, 2020	Orapa			0.458667	8.08967	1.73946	0.111667	4.65067	0.808966	0.314232	361.586	20.6344	0.105111	1.00988		0.125667	22.528	1.25081	0.0533333	18.0107	0.0506667	0.584816	0.115259	49.9489	0.188856	3.77667	1.06259		0.473291	1278.24		3.64987	7.23911		15.9583	1.33598	0.0791929	11.945	12.7392	189.212	195.261	0.984181	8.00084			771.388
OE43	13,14	Aulbach et al., 2017, 2020	Orapa			0.346	10.2637	2.22398	0.0746667	4.615	0.774017	0.385482	483.761	2.74833	0.0723333	0.973277		0.252	21.419	1.12898	0.0603333	18.972	0.083	0.44896	0.266583	162.603	0.314	5.52	0.943601		0.216644	1710.14		1.37302	2.9751		16.3648	1.31067	0.0666371	12.4858	8.74054	306.424	310.129	0.931296	11.577			883.99
OE52	13,14	Aulbach et al., 2017, 2020	Orapa			0.384667	8.15167	1.96252	0.109333	4.15367	0.835893	0.29536	229.363	2.93556	0.0488889	1.60091		0.270667	22.4187	1.49721	0.121667	14.9737	0.0803333	0.640603	0.152563	61.9911	0.0861889	1.28811	1.62003		0	810.822		1.42118	3.69994		15.9985	1.58328	0.116117	10.1047	13.5757	137.309	137.309	1.5666	2.84324		-4.34	873.16
OE79	13,14	Aulbach et al., 2017, 2020	Orapa			0.295333	4.99767	1.53271	0.206333	3.26067	0.885856	0.165912	361.967	49.6038	0.0514286	1.10211		0.0773333	22.6217	1.55632	0.176667	14.5353	0.032	0.66186	0.12925	63.1689	0.204556	1.97778	1.21263		0.41848	1279.59		3.81897	5.73015		14.6331	1.55266	0.189215	9.4245	15.1033	196.739	202.094	1.08089	5.18216		-3.81	691.671
OE83	13,14	Aulbach et al., 2017, 2020	Orapa			0.392	7.19733	1.70647	0.0806667	4.21767	0.829336	0.264982	488.611	41.7244	0.034875	1.14659		0.101	21.7197	1.20211	0.0526667	18.068	0.0363333	0.527912	0.202933	86.8433	0.598333	2.06556	1.20802		0.897467	1727.29		3.88119	5.62635		15.0549	1.28286	0.0646684	11.7353	11.3054	265.057	280.558	1.13101	6.0238		-3.29	783.198
OE86	13,14	Aulbach et al., 2017, 2020	Orapa			0.350333	8.07567	2.56099	0.05	3.15333	0.865509	0.308834	429.896	39.1011	0.045125	1.09006		0.113333	21.8547	1.33477	0.041	16.3733	0.0313333	0.596462	0.159799	63.8544	0.372778	2.69222	1.17372		0.841092	1519.72		3.09118	6.73243		15.5282	1.50144	0.0446673	10.3422	12.4848	226.496	239.279	1.07733	7.92328		-3.34	713.369
787	14	Aulbach et al., 2020	Orapa			0.3288	11.1918	2.69228	0.096	4.157	0.80165	0.431323	261.708	1.178	0.0382	1.13663		0.2808	22.5714	1.32842	0.0704	16.9912	0.113	0.572225	0.19121	78.5122	0.0943667	2.13111	1.1394		0	925.165		1.17094	3.33335		17.4506	1.55589	0.08192	11.2158	11.254	160.95	160.95	1.11112	4.2833		-3.56	920.045
789	14	Aulbach et al., 2020	Orapa			0.4462	5.6946	1.4405	0.0434	3.9532	0.858726	0.214327	355.04	5.84667	0.121333	1.04968		0.2558	22.6234	1.36854	0.0696	16.531	0.1022	0.583352	0.19467	130.04	0.197714	2.92286	1.00847		0.482397	1255.1		1.74433	2.73024		14.9371	1.38031	0.0575374	10.8216	13.1434	230.12	236.175	0.994877	7.51672		-2.72	770.944
790	14	Aulbach et al., 2020	Orapa			0.3334	10.908	2.75524	0.11	3.959	0.814387	0.400225	293.437	0.822	0.0705556	1.17696		0.2416	22.6134	1.36797	0.0942	16.5306	0.1034	0.599004	0.163123	77.38	0.050325	2.88125	1.16631		0	1037.33		1.37997	3.79215		17.346	1.59527	0.10131	10.8734	12.0038	174.606	174.606	1.14348	4.69449		-3.86	881.058
794	14	Aulbach et al., 2020	Orapa			0.5726	11.8684	1.90498	0.0364	6.2302	0.72779	0.416789	208.625	1.92588	0.250625	0.964469		0.59	21.958	1.26259	0.0135	17.3912	0.235	0.587712	0.136071	98.2456	0.254	4.94778	0.950006		0	737.51		0.970508	2.12351		17.4177	1.4082	0.023805	12.3688	11.854	147.916	147.916	0.938366	8.94943		-5.16	1077.79
Northern Slave craton
10--13	15	Smart et al., 2014	Muskox and Jericho	NIST612: reported accuracy better than 3%		0.14	12.9	2.51953	0.01	5.12	0.705481	0.501681	156	3.62	1.18	1.42151		0.11	22	0.977778	0.01	22.5	0.05	0.318907	0.289439	664	0.1	0.64	2.0153		0.568619	551.476		1.27273	0.23494		17.8058	1.21953	0.00994314	14.6005	6.31014	433.069	436.204	1.6856	4.8495			839.294
1--1	15	Smart et al., 2014	Muskox and Jericho			0.15	9.4	3.98305	0.06	2.36	0.896762	0.294397	182	3.63	0.07	1.26501		0.12	23.3	1.72593	0.05	13.5	0.05	0.630091	0.243246	794	0.15	1.59	1.35209		0.407325	643.388		1.25	0.229219		16.9784	2.00816	0.054276	8.4547	12.2203	516.612	519.233	1.29398	4.33571			785.579
35-2	15	Smart et al., 2014	Muskox and Jericho			0.11	7.5	1.37112	0.08	5.47	0.781885	0.310395	360	14.1	0.1	1.55136		0.07	22.8	1.07547	0.04	21.2	0.05	0.495914	0.12058	590	0.18	3.77	1.68281		1.20839	1272.64		1.57143	0.610169		15.7319	1.1269	0.057275	13.9604	11.2478	480.76	496.139	1.5323	8.93578			709.862
55-7	15	Smart et al., 2014	Muskox and Jericho			0.12	13.4	5.1938	0.04	2.58	0.84888	0.465107	127	0.14	0.05	0.976218		0.12	22.7	1.47403	0.04	15.4	0.05	0.448302	0.398461	771	0.15	2.92	1.38811		0.705373	448.958		1	0.164721		18.3877	1.92187	0.0397179	9.56759	7.46607	478.033	481.2	1.35863	6.16108			819.269
Jde25	15	Smart et al., 2014	Muskox and Jericho			0.39	10.7	3.31269	0.08	3.23	0.841639	0.423497	187	0.87		1.5543		0.37	22.5	1.64234	0.07	13.7	0.14	0.63551	0.21868	80.3	0.09	0.87	1.41648		0.0227073	661.064		1.05405	2.32877		17.1862	1.91243	0.074483	8.98658	11.7009	128.285	128.435	1.41685	2.84791			975.099
Jer 1	15	Smart et al., 2014	Muskox and Jericho			0.11	10.7	5.84699	0.08	1.83	0.909364	0.340007	180	1.32	0.02	1.07055		0.08	23.4	2.01724	0.07	11.6	0.04	0.628307	0.359923	497	0.31	1.73	1.40605		0.440752	636.318		1.375	0.362173		17.6099	2.45471	0.0741694	7.1739	10.6381	352.858	355.663	1.32316	3.97835			848.029
Jer 2	15	Smart et al., 2014	Muskox and Jericho			0.11	11.4	6.82635	0.15	1.67	0.91323	0.407424	135	4.57		1.55315		0.04	23.8	2	0.11	11.9	0.04	0.696225	0.208897	216	0.13	0.89	1.76111		0.668182	477.238		2.75	0.625		18.1024	2.49648	0.127131	7.25116	12.7679	178.377	181.566	1.66303	2.68043			776.853
Jer 3	15	Smart et al., 2014	Muskox and Jericho			0.22	14	6.14035	0.04	2.28	0.858499	0.441125	191	2.85		0.89102		0.15	22.9	1.59028	0.04	14.4	0.07	0.483104	0.415198	919	0.67	3.59	1.24734		0.916349	675.204		1.46667	0.207835		18.7259	2.11125	0.0396335	8.86958	7.57435	586.314	592.501	1.20038	5.72753			850.32
Jer 4	15	Smart et al., 2014	Muskox and Jericho			0.12	9.87	2.7493	0.02	3.59	0.826744	0.387588	182	2.19		1.25255		0.05	22.8	1.22581	0.01	18.6	0.04	0.491862	0.226427	326	0.11	3.55	1.19466		0.823781	643.388		2.4	0.558282		16.8469	1.43328	0.0143764	11.7541	9.79832	259.108	264.408	1.15974	8.2101			775.6
Jer 5	15	Smart et al., 2014	Muskox and Jericho			0.08	3.89	0.604037	0.09	6.44	0.781216	0.16929	378	15.3	0.22	1.10821		0.06	22.6	1.00893	0.12	22.4	0.03	0.480014	0.104973	430	0.07	7.5	1.02188		1.16268	1336.27		1.33333	0.87907		14.0265	0.931972	0.105279	15.0503	12.0426	401.903	417.439	1.02107	15.8405			655.937
Jer 6	15	Smart et al., 2014	Muskox and Jericho			0.11	6.53	1.04984	0.02	6.22	0.757508	0.271097	267	4.42	0.1	1.38864		0.07	22.5	0.95339	0.02	23.6	0.06	0.411048	0.15391	422	0.11	8.69	1.35829		0.710426	943.872		1.57143	0.632701		15.2104	0.970478	0.0198579	15.6731	9.91546	349.803	356.508	1.29881	16.9347			697.511
Jer 7	15	Smart et al., 2014	Muskox and Jericho			0.1	7.67	2.16667	0.14	3.54	0.852744	0.297574	207	6.25	0.06	1.34527		0.04	23.2	1.33333	0.11	17.4	0.04	0.569259	0.163992	212	0.07	1.87	1.51202		0.62503	731.766		2.5	0.976415		16.115	1.45212	0.122719	11.0976	12.1937	208.441	213.014	1.34903	4.17834			722.44
Jer 8	15	Smart et al., 2014	Muskox and Jericho			0.17	11.2	1.48541	0.01	7.54	0.600578	0.475775	236	2.56	0.05	1.40232		0.09	22.1	0.833962	0.01	26.5	0.06	0.250555	0.235565	385	0.22	5.76	1.40794		1.18726	834.284		1.88889	0.612987		16.9973	0.956737	0.00988127	17.7659	5.52824	314.264	324.169	1.38054	18.1958			823.122
Mox1	15	Smart et al., 2014	Muskox and Jericho			0.14	6.39	1.67277	0.06	3.82	0.855625	0.251906	224	3.2	0.1	0.831026		0.32	23.1	1.8629	0.07	12.4	0.13	0.674279	0.232377	156	0.73	1.53	0.966036		0	791.862		0.4375	1.4359		15.5805	1.82463	0.0655	8.539	13.635	186.6	186.6	0.917844	3.2027			1032.79
R183	15	Smart et al., 2014	Muskox and Jericho			0.15	9	3.86266	0.06	2.33	0.89951	0.327601	191	3.49	0.05	1.39024		0.11	23.2	1.71852	0.07	13.5	0.06	0.626442	0.247445	851	0.19	1.51	1.36586		0.394455	675.204		1.36364	0.224442		16.7465	1.98365	0.0652436	8.44228	12.2019	551.945	554.608	1.32812	4.06573			774.44
346	16	Smart et al., 2017	Voyageur	BCR-2G: m 423±28 ppm/a 425±18 ppm		0.2	8.9	1.98661	0.01	4.48	0.800907	0.36015	165	4.5	0.02	1.31266		0.12	22.46	1.19278	0.01	18.83	0.07	0.505541	0.197329	44	0.22	1.4	1.4233		0.590953	583.292		1.66667	3.75		16.2653	1.322	0.0099409	12.3036	10.4277	97.8325	101.279	1.34501	5.61134			819.86
408	16	Smart et al., 2017	Voyageur			0.13	6.75	1.03528	0.04	6.52	0.741103	0.287314	614	3.8	0.07	1.24444		0.11	21.94	0.965244	0.04	22.73	0.05	0.36407	0.232098	238	0.16	5.2	1.28929		1.02926	2170.55		1.18182	2.57983		14.9569	0.978533	0.0395883	15.285	8.63505	402.815	425.156	1.24494	11.654			778.121
362B	16	Smart et al., 2017	Voyageur			0.17	6.33	1.07653	0.09	5.88	0.779339	0.269414	489	14	0.1	1.43589		0.07	22.77	1.07304	0.08	21.22	0.05	0.507366	0.0961236	106	0.15	2.2	1.39733		0.911125	1728.66		2.42857	4.61321		15.2394	1.07369	0.0837255	14.1935	11.8766	275.639	291.39	1.35106	6.18406			681.098
380A	16	Smart et al., 2017	Voyageur			0.38	13.45	2.82563	0.02	4.76	0.711643	0.533213	223	0.88	0.02	1.18991		0.18	22.4	1.16183	0.01	19.28	0.1	0.383921	0.327535	49	0.25	2.2	1.57222		0.652726	788.327		2.11111	4.55102		18.2555	1.44112	0.0144021	12.6675	6.629	126.412	131.558	1.53089	7.62318			989.943
383A	16	Smart et al., 2017	Voyageur			0.09	3.06	0.399478	0.04	7.66	0.759092	0.132371	467	37	0.27	1.04117		0.09	22.19	0.960606	0.08	23.1	0.04	0.454801	0.105956	235	0.24	7.5	1.14123		1.24179	1650.89		1	1.98723		13.4247	0.841095	0.0612549	15.961	11.8873	335.041	355.542	1.03731	15.5156			666.427
Central Slave craton
vr19673 ecl-g2	17	Aulbach et al., 2007	Diavik	BCR-2G: m 424±21 ppm/a 425±18 ppm		0.289438	7.72669	1.57736	0.132188	4.8985	0.804166	0.323869	211.535	11.625	0.15025	1.36012		0.125312	22.6544	1.20407	0.119563	18.8149	0.0615	0.592535	0.0717518	70.5025	0.08275	3.0275	1.42767		0.456217	747.797	0.0717518	2.30973	3.00039		15.8676	1.26957	0.124669	12.4984	13.4589	133.324	136.735	1.31087	6.39303			697.337
vr43452	17	Aulbach et al., 2007	Diavik			0.416143	8.18281	1.32109	0.0372381	6.194	0.740528	0.340889	470	1.298	0.232	0.894963		0.343333	21.8958	1.07397	0.02925	20.3877	0.11425	0.483723	0.17488	179.61	0.06105	9.7975	0.997813		0	1661.5	0.17488	1.21207	2.61678		15.725	1.12317	0.0328446	14.0005	10.3563	310.286	310.286	0.920507	16.3716			887.149
vr43469	17	Aulbach et al., 2007	Diavik			0.294125	6.79356	1.17108	0.0364375	5.80112	0.77232	0.246868	480	3.26	0.08444	0.965646		0.263542	22.0914	1.1705	0.066625	18.8735	0.0707083	0.446862	0.281601	250.238	0.3388	5.954	0.981863		0.390564	1696.85	0.281601	1.11605	1.91817		15.151	1.17062	0.0528394	12.9427	9.6337	352.205	358.832	0.959336	11.9846			903.508
vr43479	17	Aulbach et al., 2007	Diavik			0.180833	6.41758	1.66259	0.0513333	3.86	0.85942	0.199264	180.15	4.445	<0.013	1.18287		0.379733	22.7881	2.20175	0.0644667	10.35	0.0490667	0.742745	0.21275	78.28	0.465	0.607	1.25988		0	636.848	0.21275	0.476211	2.30135		15.4214	2.0757	0.0585567	7.4295	15.1769	124.122	124.122	1.21323				1169.43
vr50909a	17	Aulbach et al., 2007	Diavik			0.14	15.37	9.14881	0.04	1.68	0.87796	0.527584	310	0.672	0.037	1.10525		0.12	22.3	1.47389	0.02	15.13	0.07	0.533073	0.326087	110	0.155143	3.24429	1.19969		0.859039	1095.88	0.326087	1.16667	2.81818		19.0197	2.11206	0.0287423	9.0053	8.30976	198.196	207.61	1.17856				794.603
yk1926	17	Aulbach et al., 2007	Diavik			0.170625	7.73144	1.96068	0.14025	3.94325	0.836179	0.314412	480	7.1225	0.121667	1.04921		0.0802632	22.6338	1.20395	0.109316	18.7996	0.0584211	0.538573	0.150043	95.57	0.116	3.905	1.19678		0.505749	1696.85	0.150043	2.12582	5.0225		15.851	1.3147	0.122605	12.0567	11.7914	267.108	275.69	1.06738				695.665
yk1943	17	Aulbach et al., 2007	Diavik			0.292125	6.35994	1.24303	0.04575	5.1165	0.797669	0.261595	430	19.58	0.0814	0.948353		0.3638	21.8006	1.04138	0.0509	20.9343	0.1224	0.427133	0.225987	190	0.5332	5.568	0.999261		0.670967	1520.09	0.225987	0.802982	2.26316		14.7578	1.07495	0.0482583	13.7289	9.84063	295.92	306.119	0.953931	11.4148			746.066
MX121	14,18	Schmidberger et al., 2007, Aulbach et al., 2020	Diavik	BIR-1G: m 328±10 ppm/a 326±26 ppm		0.35	5.46	1.36842	0.08	3.99	0.86044	0.157892	253.59	3.26111	0.0322111	1.05159		0.59	22.39	2.02076	0.16	11.08	0.12	0.687901	0.276507	193.536	0.329267	1.42333	1.107		0.00761984	896.466	0.276507	0.59322	1.3103		14.7704	1.8723	0.123991	7.88893	13.744	220.543	220.612	1.07646	3.93742		-2.0556	1099.32
MX133	14,18	Schmidberger et al., 2007, Aulbach et al., 2020	Diavik			0.17	6.34	1.44749	0.08	4.38	0.840418	0.248009	265.729	8.52	0.1346	1.15695		0.1	22.88	1.33101	0.07	17.19	0.05	0.621882	0.0771892	53.3336	0.0387133	2.47933	1.21141		0.534596	939.377	0.0771892	1.7	4.98239		15.3589	1.35108	0.0740991	11.3678	14.469	148.059	153.08	1.12449	6.26387		-5.57076	661.078
MX45	14,18	Schmidberger et al., 2007, Aulbach et al., 2020	Diavik			0.17	8.37	2.18538	0.16	3.83	0.839882	0.341457	325.116	4.42786	0.0878571	1.08929		0.08	23.42	1.29751	0.11	18.05	0.04	0.589483	0.0962222	54.31	0.0355357	2.32643	1.15593		0.249265	1149.32	0.0962222	2.125	5.9863		16.6079	1.42879	0.132163	11.6237	13.0363	175.7	178.565	1.07107	5.10218		-5.07455	655.243
EA002	19	Aulbach et al., 2011	Ekati	NIST612: m 38±4 ppm/a 38.8±1.2 ppm		0.11975	11.55	6.8546	0.04525	1.685	0.912741	0.318491	137.407	1.15233	<0.03	1.07502		0.242455	22.68	3.35368	0.0699091	6.76273	0.0808182	0.722367	0.508541	124.487	0.65375	0.5975	1.48052		0.0476236	485.746	0.508541	0.493907	1.10378		17.6633	3.94647	0.0587851	4.47574	9.87367	130.239	130.47	1.42131				1077.07
EA004	19	Aulbach et al., 2011	Ekati			0.1608	7.63	2.76449	0.095	2.76	0.882243	0.212511	125.684	2.468	0.0443333	1.3339		0.276143	22.8057	2.38352	0.144476	9.5681	0.0808571	0.696332	0.360405	98.4111	0.489778	0.789333	1.38231		0.128795	444.306	0.360405	0.582307	1.27713		15.957	2.45625	0.122058	6.49651	11.9741	110.54	111.112	1.35296	2.35582			1107.95
1041	14	Aulbach et al., 2020	Diavik	BIR-1G: m 328±10 ppm/a 326±26 ppm		0.225733	5.25	1.86966	0.0762	2.808	0.899354	0.191488	225.068	29.93	0.0201222	1.10589		0.20525	23.1375	1.71484	0.090375	13.4925	0.063125	0.671808	0.174002	81.6067	0.22385	0.699	1.21845		0.420238	795.637		1.0998	2.75796		15.0285	1.73735	0.0836462	8.65022	14.7936	145.52	148.863	1.1184	2.10046			736.712
1051	14	Aulbach et al., 2020	Diavik			0.0960909	5.92727	0.965354	0.0244545	6.14	0.764416	0.243486	347.147	12.0327	0.0650267	1.13371		0.0542	21.934	0.966085	0.037	22.704	0.0298	0.378844	0.238848	88.084	0.145736	2.26133	1.17342		0.49908	1227.2		1.7729	3.94109		14.6614	0.965953	0.0312012	15.1782	9.25449	203.576	209.701	1.10217	5.14962			760.527
1055	14	Aulbach et al., 2020	Diavik			0.259357	9.96714	3.32396	0.126429	2.99857	0.859588	0.38774	350.707	11.7967	0.0667778	1.13857		0.184167	22.7383	1.39957	0.101917	16.2467	0.0765	0.593453	0.188567	82.5036	0.149818	2.27727	1.07559		0.361928	1239.78		1.40827	4.2508		16.9321	1.65188	0.112534	10.2502	11.9086	202.411	206.898	1.05298	5.26477			775.052
1503	14	Aulbach et al., 2020	Diavik			0.243071	8.975	3.10017	0.0619286	2.895	0.879219	0.284712	220.518	0.941846	0.018175	1.35176		0.390333	22.9517	2.07036	0.0775	11.0858	0.113333	0.682001	0.297914	137.837	0.157077	0.764385	1.42683		0	779.555		0.622728	1.59985		16.6622	2.25166	0.0704929	7.39996	12.6556	175.044	175.044	1.39282	1.95587			1021.88
1530	14	Aulbach et al., 2020	Diavik			0.269133	5.62	0.954268	0.0496667	5.88933	0.783108	0.202075	423.474	2.85417	0.08375	0.951209		0.287846	22.2223	1.20537	0.0718462	18.4362	0.0770769	0.482307	0.2625	208.434	0.206615	3.98769	1.00589		0.255558	1497.02		0.93499	2.0317		14.7157	1.15336	0.0617101	12.759	10.6398	304.395	308.22	0.967484	8.71468			914.65
1554	14	Aulbach et al., 2020	Diavik			0.2626	4.27	1.13846	0.0866667	3.75067	0.873884	0.166982	369.581	24.7087	0.07032	1.06839		0.159	23.37	1.73626	0.1	13.46	0.043	0.705975	0.0977769	115.432	0.0810308	1.36454	1.20465		0.679885	1306.5		1.65157	3.20171		14.681	1.62539	0.0933654	9.03229	16.421	228.15	237.033	1.06039	4.07576			750.426
1617	14	Aulbach et al., 2020	Diavik			0.315933	7.08667	2.09623	0.0618667	3.38067	0.86779	0.253227	203.866	2.174	0.0221833	1.06379		0.5145	22.6425	2.01177	0.1065	11.255	0.143	0.686835	0.28274	107.445	0.243545	0.876	1.08516		0	720.686		0.614059	1.89739		15.6424	2.02843	0.086415	7.71155	13.2177	150.835	150.835	1.05543	2.80913			1069.47
1641	14	Aulbach et al., 2020	Diavik			0.17	4.43	1.33434	0.035	3.32	0.887209	0.178309	418.737	8.532	0.0816	1.11179		0.175778	23.1567	1.6034	0.0438889	14.4422	0.0718889	0.666312	0.133165	123.261	0.0505533	2.528	1.18073		0.748929	1480.28		0.96713	3.39717		14.6264	1.56086	0.0395935	9.37071	15.3748	254.196	265.282	1.08263	6.07915			702.002
1646	14	Aulbach et al., 2020	Diavik			0.198467	7.07933	1.49669	0.0462	4.73	0.809682	0.286491	539.286	5.032	0.0625667	1.0521		0.2312	22.098	1.02438	0.0764	21.572	0.0872	0.410187	0.230697	242.888	0.160608	4.71615	1.03016		0.45968	1906.43		0.85842	2.22031		15.2725	1.09617	0.0625282	13.9326	9.66341	374.469	383.233	1.00012	9.79037			704.619
1649	14	Aulbach et al., 2020	Diavik			0.3328	9.72533	3.33669	0.0556	2.91467	0.868842	0.28898	268.94	1.208	0.0197667	1.33344		0.482786	22.6586	2.12088	0.0831429	10.6836	0.124357	0.678073	0.333897	166.107	0.369333	0.948333	1.18082		0	950.73		0.689333	1.61908		16.8386	2.34274	0.0707486	7.18756	11.8171	212.382	212.382	1.18307	2.5269			1103.03
1534	14	Aulbach et al., 2020	Diavik			0.3062	5.326	1.51049	0.1886	3.526	0.876605	0.14893	200.691	4.40533	0.0290167	1.0289		0.5248	22.2727	2.14504	0.3698	10.3833	0.115067	0.729146	0.244551	121.066	0.3478	0.9986	1.08579		0	709.462		0.58346	1.6577		14.6467	2.00707	0.28826	7.29753	14.9478	156.897	156.897	1.04091	2.72819			1085.22
1610	14	Aulbach et al., 2020	Diavik			0.217091	3.75545	0.930196	0.342455	4.03727	0.866491	0.135982	251.559	64.2233	0.0464667	1.15597		0.202714	22.7686	1.54708	0.524571	14.7171	0.0651429	0.678829	0.100116	79.1257	0.165521	0.960714	1.3526		0.271558	889.287		1.07092	3.17924		14.1767	1.43405	0.441442	9.88574	16.1684	156.272	158.687	1.15599	2.41404			729.766
Superior craton
VIC0107	20	Smit et al., 2014	Victor, Attawaspikat	EPMA, offline		0.21	4.65	1.08899	0.08	4.27	0.848445	0.166666	543.807	26.26	0.32	0.923484		0.1	23.19	1.40973	0.07	16.45	0.06	0.633195	0.111311	135.952	0.11	8.57	0.916518		1.11579	1922.41		2.1	4		14.6917	1.35365	0.0736632	10.8534	14.6323	315.694	337.144	0.875955	17.7387			731.45
VIC0201	20	Smit et al., 2014	Victor, Attawaspikat			0.22	4.46	1.40694	0.15	3.17	0.88765	0.165694	543.807	13.89	0.19	0.900904		0.08	23.6	1.78248	0.08	13.24	0.04	0.706165	0.10192	135.952	0.04	5.14	0.850901		0.533523	1922.41		2.75	4		14.9121	1.72102	0.110886	8.66472	16.0549	317.673	327.93	0.846143	9.98528			705.87
VIC0302	20	Smit et al., 2014	Victor, Attawaspikat			0.16	3.74	0.813043	0.04	4.6	0.843705	0.128771	543.807	35.44	0.19	0.939426		0.06	23	1.28852	0.05	17.85	0.04	0.595798	0.12	135.952	0.13	12.06	0.930518		1.35386	1922.41		2.66667	4		14.152	1.20591	0.0448908	11.7355	14.1923	314.885	340.912	0.867139	23.2402			702.545
VIC0502	20	Smit et al., 2014	Victor, Attawaspikat			0.12	9.62	2.48579	0.04	3.87	0.814461	0.37106	475.831	1.01		0.981892		0.04	22.3	1.06801	0.04	20.88	0.1	0.386524	0.27594	96	0.33	4.9	1.01631		1.22628	1682.11		3	4.95657		16.3983	1.25429	0.0395095	13.0737	8.24382	263.418	284.045	0.977773	8.98222			715.064
VIC0504	20	Smit et al., 2014	Victor, Attawaspikat			0.14	7.73	1.22893	0.02	6.29	0.734066	0.308497	815.71	4.96	0.16	0.836184		0.05	22.04	0.904391	0.01	24.37	0.05	0.330213	0.226554	203.928	0.12	10.95	0.858058		0.980661	2883.62		2.8	4		15.4545	0.960884	0.0143529	16.0837	8.00919	474.23	502.509	0.821958	21.6464			727.119
VIC0506	20	Smit et al., 2014	Victor, Attawaspikat			0.2	4.94	1.44868	0.2	3.41	0.874503	0.174499	271.903	13.44	0.04	1.05611		0.09	22.76	1.41016	0.18	16.14	0.04	0.594966	0.180175	96	0.1	1.34	1.12403		0.718834	961.206		2.22222	2.83233		14.6414	1.41583	0.187634	10.3412	13.2178	173.834	180.744	1.02994	4.49002			716.753
VIC0607	20	Smit et al., 2014	Victor, Attawaspikat			0.38	7.12	1.69121	0.15	4.21	0.831326	0.220744	339.879	12.61		1.03974		0.14	22.56	1.26387	0.12	17.85	0.07	0.537344	0.208003	96	0.25	1.82	1.14199		0.294956	1201.51		2.71429	3.54041		15.5682	1.33296	0.133102	11.6795	11.6002	205.103	208.647	1.06962	3.61069			799.892
VIC0608	20	Smit et al., 2014	Victor, Attawaspikat			0.41	15.92	12.0606	0.12	1.32	0.913801	0.449694	135.952	0.02	0.06	1.16373		0.13	22.84	2.09349	0.11	10.91	0.05	0.617728	0.412006	96	0.02	0.72	1.47704		0.139498	480.603		3.15385	1.41616		19.699	2.99105	0.11434	6.58597	8.95963	113.816	114.487	1.45171	2.01791			838.767
VIC0703	20	Smit et al., 2014	Victor, Attawaspikat			0.13	9.01	1.7984	0.04	5.01	0.771884	0.361045	475.831	5.32		1.12051		0.09	22.16	0.958063	0.04	23.13	0.06	0.365052	0.23513	135.952	0.24	8.7	1.02195		1.47155	1682.11		1.44444	3.5		16.0132	1.08424	0.0394114	14.769	8.25764	284.396	309.149	0.997164	14.5079			721.762
VIC0704	20	Smit et al., 2014	Victor, Attawaspikat			0.12	4.91	0.978088	0.02	5.02	0.818387	0.196819	271.903	18.55	0.12	0.920682		0.05	22.56	1.02313	0.02	22.05	0.03	0.45363	0.152643	96	0.07	7.79	0.991339		1.74211	961.206		2.4	2.83233		14.3782	1.01608	0.0196516	14.1507	11.159	171.952	188.697	0.896481	18.3745			630.117
VIC0705	20	Smit et al., 2014	Victor, Attawaspikat			0.17	11.51	2.74048	0.04	4.2	0.775096	0.454262	475.831	1.68		1.01926		0.08	22.22	0.974561	0.03	22.8	0.05	0.349765	0.25913	135.952	0.2	4.93	0.946539		0.963109	1682.11		2.125	3.5		17.2381	1.20546	0.0341629	14.3	7.36577	285.951	302.152	0.945252	6.36237			722.967
VIC0707	20	Smit et al., 2014	Victor, Attawaspikat			0.36	7.04	1.9831	0.09	3.55	0.855601	0.230506	543.807	19.05		1.10378		0.15	22.62	1.42803	0.09	15.84	0.06	0.575566	0.223451	135.952	0.37	4.21	1.11896		0.438462	1922.41		2.4	4		15.544	1.51398	0.0896054	10.267	11.8852	317.996	326.425	1.0592	5.89119			811.108
VIC1104	20	Smit et al., 2014	Victor, Attawaspikat			0.26	7.83	1.36174	0.03	5.75	0.755923	0.302336	747.734	5.51	0.05	0.768473		0.08	22.17	0.952729	0.03	23.27	0.05	0.362722	0.234262	203.928	0.16	7.63	0.798435		0.675555	2643.32		3.25	3.66667		15.6157	1.02143	0.0297973	15.288	8.52316	445.426	463.283	0.772972	11.9469			746.453
VIC1305	20	Smit et al., 2014	Victor, Attawaspikat			0.2	9.98	3.19872	0.12	3.12	0.851298	0.34569	407.855	2.65	0.05	1.07285		0.07	22.73	1.30258	0.1	17.45	0.04	0.497456	0.280393	135.952	0.14	2.17	0.912536		0.788285	1441.81		2.85714	3		16.8636	1.54422	0.108133	10.9204	9.76081	256.165	267.53	0.910962	4.52167			779.421
VIC1601	20	Smit et al., 2014	Victor, Attawaspikat			0.16	3.59	0.862981	0.06	4.16	0.859786	0.134475	543.807	45.95	0.04	1.06232		0.08	23	1.39818	0.06	16.45	0.04	0.636661	0.102721	135.952	0.12	5.88	1.03547		1.33225	1922.41		2	4		14.0884	1.30663	0.0592006	10.7822	15.13	314.958	340.57	0.999323	12.8953			683.904
n						261		261			261	261	261					258		259			255	259	259	261									261			258			258		260	258			59	259
Min						0.0376		0.399478			0.600578	0.128432	13.7163					0.02		0.833962			0.005	0.250555	0.0623885	18.88									0.164721			0.841095			5.52824		34.5194	0.694077			-5.57076	630.117
Max						0.825		15.4832			0.943506	0.576735	1052					0.993667		3.35368			0.235	0.810601	0.508541	919									10.9231			4.25436			18.5989		665.709	2.70886			-1.31	1439.97
Mean						0.272279		2.93933			0.831351	0.313913	362.529					0.216537		1.59972			0.0779909	0.610253	0.19984	140.635									3.35285			1.7431			12.3565		245.102	1.14083			-3.30865	887.999
1s						0.112905		2.82357			0.0551332	0.105006	178.305					0.141783		0.446224			0.039964	0.10414	0.0893699	122.542									1.82574			0.597761			2.56502		115.295	0.285122			0.957467	125.911
Median						0.263333		1.86966			0.838841	0.314412	351.068					0.177889		1.49392			0.0733333	0.629532	0.188567	110									3.00039			1.57207			12.1858		224.884	1.07105			-3.31043	884.713
Q1						0.180833		1.26596			0.790969	0.227327	226.023					0.11		1.28673			0.0495333	0.543734	0.122828	77.38									2.40547			1.30937			10.6695		163.729	0.969093			-3.90954	796.437
Q3						0.350333		3.32396			0.874274	0.384097	434.4					0.293833		1.86859			0.1	0.685265	0.260532	156									3.86381			2.03948			14.1764		296.302	1.20973			-2.5	960.779
INCLUSIONS IN DIAMOND (Pairs = P+sample number, all others unpaired)
Kaapvaal, kimberlite-hosted
28	21,22	Phillips et al., 2004, and in Stachel, 2022**	De Beers Pool	EPMA, offline														0.34	21.44	1.66978	0.45	12.84	0.06	0.716786	0.104646	392.115
29	21,22	Phillips et al., 2004, and in Stachel, 2022**	De Beers Pool			0.57	5.74	0.532468	0.09	10.78	0.654582	0.247396	448.132
30	21,22	Phillips et al., 2004, and in Stachel, 2022**	De Beers Pool			0.36	7.54	1.25249	0.06	6.02	0.772541	0.317734	392.115
31	21,22	Phillips et al., 2004, and in Stachel, 2022**	De Beers Pool			0.46	5.92	0.651265	0.1	9.09	0.708766	0.237699	448.132
100	21,22	Phillips et al., 2004, and in Stachel, 2022**	De Beers Pool			0.53	3.85	0.52381	0.19	7.35	0.790309	0.162696	392.115
106	21,22	Phillips et al., 2004, and in Stachel, 2022**	De Beers Pool															0.38	21.41	1.11394	0.04	19.22	0.14	0.391603	0.323449	392.115
245	21,22	Phillips et al., 2004, and in Stachel, 2022**	De Beers Pool															0.68	21.12	1.2194	0.14	17.32	0.11	0.505442	0.271972	560.165
257	21,22	Phillips et al., 2004, and in Stachel, 2022**	De Beers Pool			0.32	8.92	1.7456	0.09	5.11	0.780616	0.369145	504.148
306	21,22	Phillips et al., 2004, and in Stachel, 2022**	De Beers Pool			0.58	12.38	2.39922	0.08	5.16	0.728575	0.437535	392.115
307	21,22	Phillips et al., 2004, and in Stachel, 2022**	De Beers Pool			0.58	12.47	2.37524	0.08	5.25	0.726672	0.429027	448.132
323	21,22	Phillips et al., 2004, and in Stachel, 2022**	De Beers Pool			0.37	7.27	1.2198	0.19	5.96	0.794293	0.301524	392.115
333	21,22	Phillips et al., 2004, and in Stachel, 2022**	De Beers Pool															0.35	22.44	1.41132	0.15	15.9	0.11	0.642639	0.0944628	224.066
334	21,22	Phillips et al., 2004, and in Stachel, 2022**	De Beers Pool			0.45	8.84	1.6102	0.1	5.49	0.764359	0.362421	448.132
338	21,22	Phillips et al., 2004, and in Stachel, 2022**	De Beers Pool			0.19	4.62	0.935223	0.1	4.94	0.819713	0.197096	392.115
343	21,22	Phillips et al., 2004, and in Stachel, 2022**	De Beers Pool															0.56	21.42	0.996743	0.2	21.49	0.04	0.487992	0.127337	392.115
344	21,22	Phillips et al., 2004, and in Stachel, 2022**	De Beers Pool															0.37	22.82	1.44522	0.06	15.79	0.12	0.571211	0.233945	224.066
346	21,22	Phillips et al., 2004, and in Stachel, 2022**	De Beers Pool															0.75	20.45	0.932088	0.21	21.94	0.05	0.47599	0.13306	392.115
349	21,22	Phillips et al., 2004, and in Stachel, 2022**	De Beers Pool															0.58	21.83	1.31824	0.05	16.56	0.17	0.550778	0.223656	224.066
351	21,22	Phillips et al., 2004, and in Stachel, 2022**	De Beers Pool															0.63	21.37	1.19385	0.28	17.9	0.12	0.590167	0.0902405	448.132
355	21,22	Phillips et al., 2004, and in Stachel, 2022**	De Beers Pool															0.64	21.48	1.18805	0.25	18.08	0.11	0.58958	0.0914689	392.115
361	21,22	Phillips et al., 2004, and in Stachel, 2022**	De Beers Pool															0.56	21.98	0.987865	0.04	22.25	0.29	0.416242	0.173917	280.082
376	21,22	Phillips et al., 2004, and in Stachel, 2022**	De Beers Pool			0.04	3.52	1.3037	0.51	2.7	0.912975	0.149116	224.066
454	21,22	Phillips et al., 2004, and in Stachel, 2022**	De Beers Pool			0.39	3.58	0.433939	0.12	8.25	0.74456	0.154481	504.148
455	21,22	Phillips et al., 2004, and in Stachel, 2022**	De Beers Pool			0.19	6.05	1.62634	0.38	3.72	0.856148	0.220816	392.115
468	21,22	Phillips et al., 2004, and in Stachel, 2022**	De Beers Pool															0.43	21.82	1.45273	0.22	15.02	0.16	0.612707	0.200477	280.082
514	21,22	Phillips et al., 2004, and in Stachel, 2022**	De Beers Pool			0.13	3.12	0.672414	0.37	4.64	0.857785	0.10941	224.066
515	21,22	Phillips et al., 2004, and in Stachel, 2022**	De Beers Pool			0.26	6.77	1.00296	0.17	6.75	0.770739	0.286861	336.099
518	21,22	Phillips et al., 2004, and in Stachel, 2022**	De Beers Pool			0.11	1.61	0.264368	0.45	6.09	0.827337	0.0536455	280.082
527	21,22	Phillips et al., 2004, and in Stachel, 2022**	De Beers Pool			0.19	4.68	1.17	0.16	4	0.859526	0.176551	224.066
531	21,22	Phillips et al., 2004, and in Stachel, 2022**	De Beers Pool			0.32	9.54	2.03846	0.1	4.68	0.784546	0.385435	504.148
543	21,22	Phillips et al., 2004, and in Stachel, 2022**	De Beers Pool															0.37	21.81	1.07917	0.09	20.21	0.14	0.515027	0.130975	224.066
545	21,22	Phillips et al., 2004, and in Stachel, 2022**	De Beers Pool															0.31	22	1.26074	0.21	17.45	0.1	0.615195	0.0769054	168.049
546	21,22	Phillips et al., 2004, and in Stachel, 2022**	De Beers Pool															0.55	22.02	1.86137	0.01	11.83	0.18	0.388711	0.582341	280.082
546	21,22	Phillips et al., 2004, and in Stachel, 2022**	De Beers Pool															0.57	21.85	1.81932	0.02	12.01	0.18	0.387365	0.58005	336.099
547	21,22	Phillips et al., 2004, and in Stachel, 2022**	De Beers Pool															0.28	22.57	1.55655	0.12	14.5	0.1	0.564648	0.30391	168.049
341 avg	21,22	Phillips et al., 2004, and in Stachel, 2022**	De Beers Pool															0.525	22.085	1.31811	0.035	16.755	0.15	0.550044	0.22057	224.066
342 avg	21,22	Phillips et al., 2004, and in Stachel, 2022**	De Beers Pool															0.575	20.94	0.973048	0.205	21.52	0.045	0.481036	0.130111	364.107
354 avg	21,22	Phillips et al., 2004, and in Stachel, 2022**	De Beers Pool			0.665	6.45	0.908451	0.1	7.1	0.764433	0.273449	448.132
480 avg	21,22	Phillips et al., 2004, and in Stachel, 2022**	De Beers Pool															0.29	21.56	1.86505	0.945	11.56	0.075	0.748694	0.0939068	168.049
513 avg	21,22	Phillips et al., 2004, and in Stachel, 2022**	De Beers Pool															0.12	22.87	1.96478	0.02	11.64	0.09	0.62515	0.363437	140.041
526 avg	21,22	Phillips et al., 2004, and in Stachel, 2022**	De Beers Pool			0.305	6.14	0.904937	0.18	6.785	0.786181	0.25812	308.091
537 avg	21,22	Phillips et al., 2004, and in Stachel, 2022**	De Beers Pool			0.25	6.61	1.5608	0.18	4.235	0.829643	0.242349	532.157
538 avg	21,22	Phillips et al., 2004, and in Stachel, 2022**	De Beers Pool															0.35	22.075	1.10127	0.085	20.045	0.13	0.49563	0.163594	252.074
540 avg	21,22	Phillips et al., 2004, and in Stachel, 2022**	De Beers Pool															0.32	22.445	1.7272	0.07	12.995	0.115	0.581397	0.351251	140.041
541 avg	21,22	Phillips et al., 2004, and in Stachel, 2022**	De Beers Pool															0.326667	21.6033	1.1073	0.353333	19.51	0.03	0.527186	0.148154	448.132
546 avg	21,22	Phillips et al., 2004, and in Stachel, 2022**	De Beers Pool															0.56	21.935	1.84018	0.015	11.92	0.18	0.388034	0.581192	308.091
P348	21,22	Phillips et al., 2004, and in Stachel, 2022**	De Beers Pool			0.53	10.05	2.55725	0.06	3.93	0.814652	0.402817	392.115					0.45	22.24	1.33734	0.03	16.63	0.14	0.563839	0.210166	168.049						1386.17		1.17778	2.33333		16.7545	1.535	0.0435	10.915	10.9935	267.858	272.91		0			894.197
P379	21,22	Phillips et al., 2004, and in Stachel, 2022**	De Beers Pool			0.36	2.45	0.343619	0.17	7.13	0.775542	0.105981	448.132					0.62	21.15	1.1274	0.38	18.76	0.1	0.550141	0.151694	504.148						1584.19		0.580645	0.888889		12.735	0.941485	0.2855	13.5265	13.2975	477.104	483.217		0			874.506
P414 avg	21,22	Phillips et al., 2004, and in Stachel, 2022**	De Beers Pool			0.54	5.74	0.570577	0.085	10.06	0.663849	0.24698	448.132					0.485	21.62	0.980944	0.105	22.04	0.12	0.487588	0.0980547	280.082						1584.19		1.1134	1.6		14.474	0.869362	0.096	16.649	11.486	354.445	359.927		0			911.055
P415	21,22	Phillips et al., 2004, and in Stachel, 2022**	De Beers Pool			0.28	2.89	0.452978	0.09	6.38	0.796518	0.113589	336.099					0.55	21.45	1.30079	0.2	16.49	0.09	0.587591	0.18003	392.115						1188.14		0.509091	0.857143		13.098	1.09694	0.1505	11.9405	13.5535	365.781	369.458		0			944.605
P444	21,22	Phillips et al., 2004, and in Stachel, 2022**	De Beers Pool			0.15	6.75	0.652805	0.12	10.34	0.658401	0.289207	336.099					0.18	21.35	0.984779	0.16	21.68	0.12	0.492021	0.087803	168.049						1188.14		0.833333	2		14.78	0.891597	0.142	16.577	11.51	242.789	246.948		0			907.39
P539	21,22	Phillips et al., 2004, and in Stachel, 2022**	De Beers Pool			0.22	3.7	0.457921	0.15	8.08	0.754227	0.146982	392.115					0.55	21.75	1.27417	0.29	17.07	0.07	0.605376	0.112825	448.132						1386.17		0.4	0.875		13.6275	1.0463	0.227	13.0245	14.339	421.75	425.626		0			971.899
P542	21,22	Phillips et al., 2004, and in Stachel, 2022**	De Beers Pool			0.14	14.09	5.48249	0.09	2.57	0.837126	0.442761	168.049					0.305	22.525	1.93348	0.115	11.65	0.095	0.609952	0.380151	196.058						594.072		0.459016	0.857143		18.7293	2.4761	0.10375	7.564	8.9555	183.234	183.953		0			1117.21
P544 avg	21,22	Phillips et al., 2004, and in Stachel, 2022**	De Beers Pool			0.135	6.95	1.67067	0.16	4.16	0.847559	0.26373	196.058					0.14	22.53	1.77822	0.18	12.67	0.1	0.715668	0.111101	94.7514						693.084		0.964286	2.06918		15.519	1.75544	0.171	8.8405	15.6783	139.834	142.242		0			909.712
Kaapvaal, lamproite-hosted
Lot18Stone1_1B,C	23	Viljoen et al., 2018	Voorspoed	EPMA, offline		0.663333	9.71667	1.72638	0.0466667	5.62833	0.741883	0.386615	362.537
Lot1Stone1_1B	23	Viljoen et al., 2018	Voorspoed															0.743333	21.9233	1.57081	0.18	13.9567	0.176667	0.647685	0.200119	94.7514
Lot22Stone22_1A	23	Viljoen et al., 2018	Voorspoed			0.376667	5.53333	0.722682	0.23	7.65667	0.75289	0.232206	203.927
Lot22Stone45_1B,C,D	23	Viljoen et al., 2018	Voorspoed			0.283333	4.43306	1.04594	5.79889	4.23833	0.84056	0.180502	277.567
Lot24Stone14_1A-1B	23	Viljoen et al., 2018	Voorspoed															1.21	20.6617	1.21242	0.065	17.0417	0.461667	0.491939	0.299888	249.244
Lot24Stone15_1B-1E	23	Viljoen et al., 2018	Voorspoed															1.24833	20.44	1.15068	0.0516667	17.7633	0.403333	0.46116	0.303069	249.244
Lot24Stone16_1A	23	Viljoen et al., 2018	Voorspoed															1.15667	20.32	1.15872	0.06	17.5367	0.4	0.488978	0.28109	362.537
Lot24Stone19_1B	23	Viljoen et al., 2018	Voorspoed															0.91	20.8467	1.26089	0.0333333	16.5333	0.366667	0.441661	0.364038	181.269
Lot24Stone28_1A	23	Viljoen et al., 2018	Voorspoed															0.55	21.0333	0.913566	0.04	23.0233	0.176667	0.402579	0.185429	158.61
Lot24Stone3_1B-1D	23	Viljoen et al., 2018	Voorspoed															1.20333	20.1856	1.11811	0.0711111	18.0533	0.431111	0.474251	0.277521	264.35
Lot24Stone31_1A	23	Viljoen et al., 2018	Voorspoed															0.623333	21.8267	1.97705	0.0566667	11.04	0.273333	0.648775	0.360587	94.7514
Lot24Stone4_1B-1D	23	Viljoen et al., 2018	Voorspoed															0.605556	21.5633	1.26077	0.0622222	17.1033	0.192222	0.501611	0.281391	151.057
Lot24Stone6_1B-1D	23	Viljoen et al., 2018	Voorspoed															1.09111	21.0644	1.23585	0.06	17.0444	0.356667	0.462544	0.334216	294.561
Lot24Stone7_1B	23	Viljoen et al., 2018	Voorspoed															0.686667	21.4267	1.19836	0.0566667	17.88	0.216667	0.460455	0.30595	271.903
Lot24Stone8_1B	23	Viljoen et al., 2018	Voorspoed															0.796667	21.0667	1.55206	0.806667	13.5733	0.17	0.70304	0.084104	203.927
Lot28Stone11_1A	23	Viljoen et al., 2018	Voorspoed			0.358	4.286	0.538307	0.232	7.962	0.760155	0.174937	190.332
Lot28Stone5_1A	23	Viljoen et al., 2018	Voorspoed			0.384	9.648	2.28734	1.13	4.218	0.838838	0.392604	95.166
Lot34Stone6_1B,C	23	Viljoen et al., 2018	Voorspoed			0.457917	7.43083	0.839129	0.0445833	8.85542	0.662247	0.310238	342.711
Lot35Stone1_1B	23	Viljoen et al., 2018	Voorspoed															0.52	22.8025	2.03912	0.395	11.1825	0.0375	0.770325	0.0685947	271.903
Lot35Stone11_1B	23	Viljoen et al., 2018	Voorspoed															1.17	20.96	1.37804	0.0433333	15.21	0.433333	0.489657	0.370104	271.903
Lot35Stone19_1B	23	Viljoen et al., 2018	Voorspoed															0.573333	21.8033	1.08636	0.0966667	20.07	0.176667	0.488362	0.186931	294.561
Lot35Stone2_1B-1D	23	Viljoen et al., 2018	Voorspoed															1.18944	20.9339	1.14161	0.0772222	18.3372	0.295	0.479504	0.265086	358.761
Lot35Stone3_1A-1B	23	Viljoen et al., 2018	Voorspoed															1.20667	20.575	1.23921	0.0733333	16.6033	0.45	0.499934	0.305154	181.269
Lot35Stone4_1A	23	Viljoen et al., 2018	Voorspoed															0.543333	22.85	1.9968	0.0866667	11.4433	0.383333	0.642955	0.346584	249.244
Lot35Stone6_1B-1C	23	Viljoen et al., 2018	Voorspoed															0.845	21.535	1.0481	0.0416667	20.5467	0.166667	0.517385	0.128701	181.269
Lot43Stone5_1A	23	Viljoen et al., 2018	Voorspoed															1.49	21.0333	1.48436	0.113333	14.17	0.54	0.519279	0.378224	385.196
Lot7Stone1_1B	23	Viljoen et al., 2018	Voorspoed															1.03667	20.8933	1.14338	0.0566667	18.2733	0.436667	0.446421	0.30251	226.586
Lot7Stone2_1B	23	Viljoen et al., 2018	Voorspoed															1.12	21.2867	1.44939	0.0566667	14.6867	0.453333	0.491809	0.387342	158.61
Lot7Stone25_1B	23	Viljoen et al., 2018	Voorspoed															0.746667	21.67	1.49483	0.64	14.4967	0.14	0.683061	0.0942617	158.61
Lot7Stone3_1B-1D	23	Viljoen et al., 2018	Voorspoed															1.19444	21.0756	1.23353	0.0588889	17.0856	0.461111	0.46485	0.330168	324.773
Lot7Stone30_1A-1B	23	Viljoen et al., 2018	Voorspoed															0.471667	22.13	1.25596	0.42	17.62	0.1	0.611197	0.0937909	192.598
Lot7Stone5_1B	23	Viljoen et al., 2018	Voorspoed															0.666667	21.98	1.65139	0.04	13.31	0.15	0.664017	0.199179	135.951
Lot7Stone6_1C-1D	23	Viljoen et al., 2018	Voorspoed															1.06333	21.34	1.39432	0.0483333	15.305	0.448333	0.478673	0.37909	237.915
Lot7Stone8_1B-1F	23	Viljoen et al., 2018	Voorspoed															0.835333	21.8293	1.34599	0.14	16.218	0.153333	0.617796	0.148763	285.498
Lot8Stone19_1B	23	Viljoen et al., 2018	Voorspoed			0.46	7.92333	1.62031	1.2	4.89	0.823776	0.324859	67.9757
Lot8Stone3_1A-1C	23	Viljoen et al., 2018	Voorspoed			0.397778	8.07889	1.91443	1.07778	4.22	0.844783	0.331742	128.399
PLot24Stone32_2A	23	Viljoen et al., 2018	Voorspoed			0.6	8.40625	1.6162	0.03	5.20125	0.775192	0.338943	271.903					1.05333	20.81	1.32576	0.05	15.6967	0.373333	0.541431	0.296081	226.586						961.204		0.56962	1.2		15.2283	1.38771	0.041	10.9737	10.2457	246.619	248.004		0			1096.2
PLot7Stone34_2A	23	Viljoen et al., 2018	Voorspoed			0.69	11.0267	1.83778	0.0466667	6	0.707634	0.426918	294.561					1.15333	20.8422	1.16546	0.06	17.8833	0.438889	0.447802	0.319874	339.879						1041.3		0.598266	0.866667		16.4252	1.31026	0.054	12.5358	8.14056	319.086	320.399		0			1112.61
PLot7Stone4_2A	23	Viljoen et al., 2018	Voorspoed			0.72	10.0833	1.88005	0.05	5.36333	0.748618	0.396464	271.903					1.19	21.3933	1.2609	0.0666667	16.9667	0.336667	0.492681	0.304169	226.586						961.204		0.605042	1.2		16.3038	1.38813	0.0591667	11.7452	9.11583	246.573	248.138		0			1079
Zimbabwe craton in NE Botswana
dam 01	24	Deines et al., 2009	Damtshaa	EPMA, offline		0.251	5.26333	0.873824	1.42638	6.02333	0.815279	0.177987	287.764
dam 03	24	Deines et al., 2009	Damtshaa															0.405333	23.15	1.62039	0.0819008	14.2867	0.149	0.603133	0.276436	208.459
dam 04	24	Deines et al., 2009	Damtshaa															0.450667	23.4533	1.39825	0.0897633	16.7733	0.213333	0.56517	0.213833	276.435
dam 05	24	Deines et al., 2009	Damtshaa															0.469	23.46	1.45654	0.100247	16.1067	0.196333	0.588587	0.206283	258.308
dam 06	24	Deines et al., 2009	Damtshaa															1.219	21.8767	1.09365	0.0196562	20.0033	0.381333	0.416302	0.278477	414.652
dam 07	24	Deines et al., 2009	Damtshaa															0.371333	23.3967	1.75387	0.0972982	13.34	0.115	0.644662	0.253779	142.749
dam 08A	24	Deines et al., 2009	Damtshaa															0.4375	23.525	1.42619	0.0579858	16.495	0.176	0.625572	0.12002	237.915
dam 09	24	Deines et al., 2009	Damtshaa															0.397	23.1733	1.79545	0.0959878	12.9067	0.114	0.614403	0.327738	226.586
dam 10	24	Deines et al., 2009	Damtshaa															0.8372	22.704	1.47295	0.152729	15.414	0.1846	0.643321	0.146748	282.779
dam 11	24	Deines et al., 2009	Damtshaa															0.716667	23.11	1.58071	0.0704347	14.62	0.248	0.520795	0.370963	274.169
dam 12	24	Deines et al., 2009	Damtshaa															0.45	23.3833	2.20044	0.0658483	10.6267	0.161333	0.64434	0.396329	94.7514
dam 13	24	Deines et al., 2009	Damtshaa															0.591333	22.82	1.34078	0.0334155	17.02	0.264	0.482907	0.314248	94.7514
dam 14	24	Deines et al., 2009	Damtshaa															0.408667	22.98	1.59768	0.055365	14.3833	0.123667	0.585127	0.30012	237.915
dam 15	24	Deines et al., 2009	Damtshaa															0.5425	22.83	1.57829	0.0530717	14.465	0.173	0.603482	0.257647	149.547
dam 16	24	Deines et al., 2009	Damtshaa															0.395	22.89	1.6943	0.0815732	13.51	0.114667	0.59411	0.324819	224.32
dam 17	24	Deines et al., 2009	Damtshaa			0.6765	10.95	1.96589	0.0255531	5.57	0.749419	0.360731	530.21
dam 18	24	Deines et al., 2009	Damtshaa			0.344	12.345	4.00812	0.0334155	3.08	0.837195	0.343517	169.939
dam 19B	24	Deines et al., 2009	Damtshaa															0.4565	23.835	1.44149	0.0855045	16.535	0.1725	0.608299	0.163213	94.7514
dam 20	24	Deines et al., 2009	Damtshaa			0.379667	8.39333	1.47079	0.121541	5.70667	0.783323	0.255743	294.561
dam 21A	24	Deines et al., 2009	Damtshaa			0.5755	11.15	2.28484	0.117937	4.88	0.771155	0.386994	431.646
dam 59B	24	Deines et al., 2009	Damtshaa			0.577	13.23	3.34513	0.0914013	3.955	0.783304	0.445482	458.836
dam 62B	24	Deines et al., 2009	Damtshaa			0.354	9.25	1.72682	0.038002	5.35667	0.790423	0.343573	351.208
dam 71	24	Deines et al., 2009	Damtshaa			0.247	6.76667	0.937211	0.0871425	7.22	0.734819	0.271628	324.018
dam 75	24	Deines et al., 2009	Damtshaa			0.248333	6.78667	0.811155	0.0592962	8.36667	0.711052	0.257742	274.169
dam 76	24	Deines et al., 2009	Damtshaa															0.346	22.985	1.12616	0.0869787	20.41	0.1225	0.504659	0.158778	169.939
dam 88	24	Deines et al., 2009	Damtshaa															0.730333	22.4033	1.17254	0.0314499	19.1067	0.237333	0.465639	0.254722	190.332
Pdam 19A	24	Deines et al., 2009	Damtshaa			0.604	9.255	2.1106	0.116463	4.385	0.813289	0.311196	265.105					0.353333	23.2933	1.35243	0.0766592	17.2233	0.130667	0.588596	0.147404	94.7514						937.174		1.70943	2.7979		16.9761	1.48313	0.0945709	11.4461	12.4246	170.631	174.692		0			833.159
KW 100b avg	25	Motsamai et al., 2018	Karowe	EPMA, Donovan software		0.369926	10.749	1.89867	0.0561116	5.66132	0.737114	0.322514	242.655
KW 105b	25	Motsamai et al., 2018	Karowe			0.705457	2.32397	0.2797	0.217326	8.30878	0.809514	0.0986725	184.116	4.65267	0.438333	1.01314
KW 106b	25	Motsamai et al., 2018	Karowe			0.503774	10.2478	1.60062	0.039228	6.4024	0.706734	0.302089	351.926
KW 28a	25	Motsamai et al., 2018	Karowe															0.472	22.4133	1.37449	0.0433333	16.3067	0.162	0.630361	0.0991928	167.673
KW 35a	25	Motsamai et al., 2018	Karowe															0.942333	21.8267	1.3187	0.0588333	16.5517	0.242667	0.474678	0.317106	279.833
KW 36b	25	Motsamai et al., 2018	Karowe															0.620701	22.239	1.20969	0.0665277	18.3841	0.232843	0.50556	0.193639	233.288	0.126	6.71	0.994291
KW 37a	25	Motsamai et al., 2018	Karowe			0.453667	8.31333	1.09819	0.041	7.57	0.704958	0.275717	419.184
KW 38b	25	Motsamai et al., 2018	Karowe															0.47575	22.475	1.33521	0.06675	16.8325	0.2125	0.573022	0.156479	146.148
KW 39b avg	25	Motsamai et al., 2018	Karowe			0.614075	2.492	0.304404	0.169	8.1865	0.815269	0.105335	323.564
KW 40b	25	Motsamai et al., 2018	Karowe			0.646628	2.08984	0.265155	0.157555	7.88158	0.815883	0.0894128	225.443
KW 41a	25	Motsamai et al., 2018	Karowe			0.5164	9.87	1.4263	0.0436	6.92	0.693705	0.305704	301.812
KW 52	25	Motsamai et al., 2018	Karowe															0.69428	22.2475	1.98479	0.071129	11.209	0.19646	0.596628	0.419646	135.598	1.231	0.356	1.06125
KW 54b avg	25	Motsamai et al., 2018	Karowe			0.411711	8.92426	1.3874	0.0457153	6.43238	0.738333	0.299325	376.727	0.904	0.114	1.0353
KW 55b	25	Motsamai et al., 2018	Karowe			0.5505	2.985	0.383676	0.1885	7.78	0.825593	0.124563	200.528
KW 58b avg	25	Motsamai et al., 2018	Karowe															0.6783	22.203	1.39835	0.0091	15.878	0.2411	0.489446	0.322641	170.619
KW 59c avg	25	Motsamai et al., 2018	Karowe			0.682804	2.0589	0.247602	0.138989	8.31536	0.806773	0.0880093	294.628
KW 60a	25	Motsamai et al., 2018	Karowe			0.5524	10.584	1.63535	0.0412	6.472	0.68912	0.309413	377.945
KW 61	25	Motsamai et al., 2018	Karowe			0.6924	2.118	0.237817	0.1162	8.906	0.803614	0.0814085	239.274
KW 63b	25	Motsamai et al., 2018	Karowe															0.972752	21.4097	1.31079	0.0410413	16.3334	0.216565	0.499875	0.305319	284.703	0.453	4.05	1.14498
KW 64c	25	Motsamai et al., 2018	Karowe															0.7552	22.186	1.39045	0.003	15.956	0.25	0.521055	0.283977	138.67
KW 66b avg	25	Motsamai et al., 2018	Karowe			0.15335	15.4666	12.0152	0.0619303	1.28726	0.915182	0.442146	145.969
KW 67	25	Motsamai et al., 2018	Karowe			0.802165	6.58571	0.749051	0.0689991	8.79207	0.693884	0.225759	321.509
KW 68b avg	25	Motsamai et al., 2018	Karowe			0.287452	12.232	3.93574	0.0600281	3.10793	0.836178	0.321428	229.442	1.037	0.0319	1.50956
KW 78b	25	Motsamai et al., 2018	Karowe															0.587924	21.2918	1.54396	0.539821	13.7904	0.0763618	0.690154	0.0975818	209.605	0.4485	3.19	0.993655
KW 79b avg	25	Motsamai et al., 2018	Karowe															1.17133	21.3044	1.83762	0.0529472	11.5935	0.544778	0.57526	0.428478	234.524	0.5705	2.4195	1.22015
KW 80	25	Motsamai et al., 2018	Karowe															0.572433	21.6347	1.7538	0.803492	12.3359	0.0973583	0.713536	0.144707	213.228
KW 81b avg	25	Motsamai et al., 2018	Karowe															0.624263	21.8881	1.2352	0.00907907	17.7203	0.186136	0.485027	0.281666	189.854	4.16275	3.4895	1.2377
KW 82c avg	25	Motsamai et al., 2018	Karowe															0.445594	22.2629	1.95288	0.103306	11.4	0.136858	0.643856	0.345702	139.181
KW 83b avg	25	Motsamai et al., 2018	Karowe															0.758619	21.5807	1.39285	0.0258559	15.494	0.220428	0.559309	0.275789	166.503	0.262667	3.68	1.0684
KW 84	25	Motsamai et al., 2018	Karowe															0.899899	21.3188	1.38815	0.0630543	15.3577	0.254563	0.53696	0.315904	188.44
KW 87c avg	25	Motsamai et al., 2018	Karowe															0.563918	21.7445	1.14026	0.0782849	19.0699	0.157826	0.527396	0.156776	152.614
KW 89a	25	Motsamai et al., 2018	Karowe			0.310743	3.86171	0.52569	0.273649	7.34598	0.827645	0.154204	143.507	1.7445	0.2165	1.08102
KW 91c avg	25	Motsamai et al., 2018	Karowe			0.701647	1.87647	0.226518	0.115631	8.28399	0.808804	0.0795548	233.455
KW 94	25	Motsamai et al., 2018	Karowe			0.841376	5.44635	0.692925	0.0772215	7.85995	0.731221	0.232806	323.828	50.16	0.352	1.01428
KW 95	25	Motsamai et al., 2018	Karowe			0.729163	1.81119	0.210117	0.0980122	8.61994	0.800206	0.0767513	224.971
KW 97	25	Motsamai et al., 2018	Karowe															0.454433	22.264	1.81358	0.085513	12.2763	0.129285	0.635406	0.308553	150.369
PKW 51c	25	Motsamai et al., 2018	Karowe			0.5252	10.454	1.65569	0.0622	6.314	0.750351	0.362616	225.679	1.231	0.356	1.06125		0.5502	22.264	1.35756	0.0642	16.4	0.2238	0.598181	0.145797	94.7514	0.1785	6.66	0.95846		1e-09	797.799		0.954562	2.3818		16.9495	1.42897	0.0633	11.8613	12.3235	153.669	153.669	0.979283	11.6335			1049.15
PKW 65b avg	25	Motsamai et al., 2018	Karowe			0.608068	9.16929	1.37584	0.0407682	6.66449	0.714392	0.298897	368.032	1.41425	0.11425	1.2112		0.879865	21.4073	1.30704	0.0682882	16.3785	0.20276	0.509556	0.294055	254.581	0.517	3.83	1.15288		1e-09	1301.03		0.691092	1.44564		15.9002	1.32422	0.0559043	12.0072	9.45849	305.634	305.634	1.15328	8.29324			1212.59
PKW 92c	25	Motsamai et al., 2018	Karowe			0.726094	1.82605	0.214078	0.111769	8.52985	0.800603	0.078227	216.33	5.96	0.3	1.06197		0.454433	22.264	1.81358	0.085513	12.2763	0.129285	0.635406	0.308553	150.369	0.207	2.65	1.14793		1e-09	764.75		1.5978	1.43866		13.0668	1.23385	0.0973274	10.5903	15.2467	180.05	180.057	1.07113	6.90884			1262.72
PKW 9d avg	25	Motsamai et al., 2018	Karowe			0.542111	8.65667	1.44841	0.102	5.97667	0.781062	0.335141	94.7514	3.6775	0.268	1.00243		0.662	22.0267	1.47533	0.110333	14.93	0.244333	0.639489	0.140567	94.7514	0.341	5.01	1.0112		1e-09	334.956		0.818899	1		16.0102	1.46869	0.106583	10.901	13.5537	94.7514	94.7514	0.98691	9.55074			1038.93
PKW56b avg	25	Motsamai et al., 2018	Karowe			0.770324	7.04197	0.966214	0.0456078	7.28821	0.720548	0.293459	312.97	20.695	0.1245	1.01993		1.6951	19.908	1.24095	0.0839551	16.0426	0.347258	0.555046	0.263055	269.97	5.775	4.02	0.925307		0.0291965	1106.38		0.454441	1.15928		14.1143	1.1665	0.0666799	12.0997	10.9152	289.235	289.558	0.935519	10.0359			1272.84
Northern Slave craton
076G (1)	26	De Stefano et al., 2009	Jericho	LAM-ICPMS/multiple reference materials														0.61	21.26	1.19371		17.81	0.1	0.561239	0.17882	337	<2.16	7.5
076G (2)	26	De Stefano et al., 2009	Jericho	measured as unknown, accuracy not reported														0.61	21.25	1.18781		17.89	0.12	0.560135	0.17836	350	<2.16	8.5	1.13601
076G (3) avg	26	De Stefano et al., 2009	Jericho															0.612	21.236	1.19183		17.818	0.108	0.561051	0.178608	343.5		8	1.19746
256X (2)	26	De Stefano et al., 2009	Jericho			0.205	2.38	0.754358		3.155	0.905251	0.0715646	535.5	15.5	1	0
362Q (4) avg	26	De Stefano et al., 2009	Jericho															0.5	23.61	2.73264	0.28	8.64	0.065	0.81009	0.102768	358		6	0
393G (1)	26	De Stefano et al., 2009	Jericho						major elements not reported				443	28	<0.43	0.740328		0.67	21.25	1.21777		17.45	0.11	0.573814	0.172436	313		9.7
399X (6)	26	De Stefano et al., 2009	Jericho															0.464	23.1792	2.71126	0.704	8.54925	0.063	0.810427	0.106355	318		7.5	0
P377X (5) avg	26	De Stefano et al., 2009	Jericho			0.16	2.91333	0.400734		7.27	0.775484	0.126192	310	27	5.6	1.14408		0.672	21.136	1.17618	0.18	17.97	0.11	0.579455	0.144995	na		6.3	0		0.306631	1095.88		0.238095	na		12.8989	0.983427	na	13.1163	13.9356	na	na		17.2651			920.743
Central and southeastern Slave craton
DO27-00155(2) avg	27	Davies et al., 2004	DO27	LAM-ICPMS/no information on accuracy		0.405	9.675	1.81861	0.055	5.32	0.757747	0.267383	346	6.3	0.3	0.91262
DO27-00223	27	Davies et al., 2004	DO27			0.44	6.85	0.910904		7.52	0.705789	0.292322	452	5.4	0.5	1.38652
DO27-00227	27	Davies et al., 2004	DO27			0.4	9.57	1.84393		5.19	0.782262	0.303667	448	12.6	0.45	1.44817
DO2700007	27	Davies et al., 2004	DO27															0.91	21.2	1.44022	0	14.72	0.2	0.486071	0.397066	214	2.3	11.7	0.824967
DO27000129 avg	27	Davies et al., 2004	DO27															0.48	22.2	1.4425	0.11	15.39	0.09	0.573939	0.262505	146.5	0.6	7.65	0.934942
DO27000175	27	Davies et al., 2004	DO27															1.24	21.2	1.61217	0	13.15	0.26	0.437604	0.496792	256	1.5	6.8	0.861586
DO27000177(2) avg	27	Davies et al., 2004	DO27															0.535	21.95	1.25608	0.045	17.475	0.285	0.490167	0.265413	154	0.92	5	0.882204
DO27000199	27	Davies et al., 2004	DO27															0.52	21.6	1.35678	0	15.92	0.2	0.556361	0.252771	241	1.4	6.2	1.20001
DO27000200	27	Davies et al., 2004	DO27															0.52	22.2	1.39887	0	15.87	0.19	0.553808	0.256042	221	2.3	7.6	0.814274
DO2700042	27	Davies et al., 2004	DO27															0.36	21.7	1.14512	0	18.95	0.13	0.48069	0.225188	179	0.42	5.6	0.828348
ddmi-186 avg	28	Donnelly et al., 2007	A154-S (Diavik)	EPMA, offline		0.075	17.6105	14.7245	0.035	1.196	0.90112	0.402011	116
ddmi-48b avg	28	Donnelly et al., 2007	A154-S (Diavik)			0.2704	4.942	0.981919	0.121	5.033	0.831301	0.189636	237.575
ddmi-166 avg	28	Donnelly et al., 2007	A154-S (Diavik)															0.3035	22.601	2.4082	0.0815	9.385	0.14	0.694738	0.375254	96.1314
ddmi-205a	28	Donnelly et al., 2007	A154-S (Diavik)															0.357	21.825	1.95565	0.062	11.16	0.117	0.635709	0.371109	96.1314
ddmi-208b	28	Donnelly et al., 2007	A154-S (Diavik)															0.326	22.005	2.31632	0.061	9.5	0.155	0.692823	0.366654	96.1314
SL3-32 (39)	29	Promprated et al., 2004	Snap Lake	SIMS/no information on accuracy					major elements not reported				324	1.82	< dl	1.04372
SL5-52 (92) avg	29	Promprated et al., 2004	Snap Lake			0.48	8.66	1.53546	0.04	5.64	0.745541	0.369275	249	14.05	0.24	1.06612
SL5-6 (116) avg	29	Promprated et al., 2004	Snap Lake															0.44	21.7	1.4	0.07	15.5	0.33	0.656251	0.0787127	120	0.1176	2.346	0.868768
GK_19	22	Siva-Jothy 2020 (MSc thesis) in Stachel, 2022***	Gahcho Kue	EPMA, Donovan software														0.84622	21.5612	1.3256	0.0375027	16.2652	0.298026	0.55842	0.224171	94.7514	0.302	3.34	1.20427
GK_29	22	Siva-Jothy 2020 (MSc thesis) in Stachel, 2022***	Gahcho Kue															0.230606	23.3665	2.23002	0.232311	10.4782	0.184555	0.784002	0.0523526	94.7514
GK_33	22	Siva-Jothy 2020 (MSc thesis) in Stachel, 2022***	Gahcho Kue			0.526971	5.18982	0.814409	0.0669197	6.3725	0.773002	0.215504	563.994
GK_48	22	Siva-Jothy 2020 (MSc thesis) in Stachel, 2022***	Gahcho Kue															0.502344	22.217	1.18123	0.0322735	18.8084	0.280869	0.459429	0.263766	166.418	0.237	5.84	1.00953
GK_52A	22	Siva-Jothy 2020 (MSc thesis) in Stachel, 2022***	Gahcho Kue			0.077885	1.9282	0.354936	0.58572	5.43252	0.842818	0.0723261	261.806
GK_57D avg	22	Siva-Jothy 2020 (MSc thesis) in Stachel, 2022***	Gahcho Kue															0.678727	22.3308	1.3788	0.0376467	16.1958	0.296606	0.497582	0.316889	145.247
GK_82B avg	22	Siva-Jothy 2020 (MSc thesis) in Stachel, 2022***	Gahcho Kue															0.388739	22.5657	2.34025	0.355029	9.64243	0.18509	0.799037	0.0541056	94.7514
GK_88B avg	22	Siva-Jothy 2020 (MSc thesis) in Stachel, 2022***	Gahcho Kue															0.715541	21.3933	1.43008	0.1461	14.9596	0.247949	0.619305	0.198178	94.7514
Superior craton
VMC23-1	30	Stachel et al, 2018	Victor	EPMA, offline		0.339	9.48333	1.43469	0.0846667	6.61	0.738402	0.373716	283.232
VMO201-1	30	Stachel et al, 2018	Victor															0.695	20.065	1.04805	0.058	19.145	0.23	0.504728	0.199647	200.528
VMO202-1 (coat)	30	Stachel et al, 2018	Victor															0.3215	22.62	1.58626	0.103	14.26	0.12	0.689814	0.0892963	94.7514
VMO206-1	30	Stachel et al, 2018	Victor															0.305333	21.4067	1.40218	0.052	15.2667	0.12	0.659032	0.10777	94.7514
VSS404-3	30	Stachel et al, 2018	Victor															0.6515	21.975	1.26475	0.035	17.375	0.33	0.52643	0.238179	224.32
VMO203-2 (coat)	30	Stachel et al, 2018	Victor															0.325667	22.4333	1.5604	0.0666667	14.3767	0.0305	0.681162	0.0915868	150.8	0.115	4.36	1.1551
VMO204-1 (coat)	30	Stachel et al, 2018	Victor															0.3265	21.955	1.38912	0.181	15.805	0.0375	0.653678	0.0835155	94.7514	0.066	3.68	1.02483
VMO205-2 (coat)	30	Stachel et al, 2018	Victor															0.305	22.18	1.56252	0.1625	14.195	0.0275	0.68498	0.09231	158.86	0.142	3.89	0.979319
n						85		85			85	85	87					135		135			135	135	135	134									17			18			18		17	5				18
Min						0.04		0.210117			0.654582	0.0536455	67.9757					0.12		0.913566			0.0275	0.387365	0.0523526	94.7514									0.857143			0.869362			8.14056		94.7514	0.935519				833.159
Max						0.841376		14.7245			0.915182	0.445482	563.994					1.6951		2.73264			0.544778	0.810427	0.582341	560.165									2.7979			2.4761			15.6783		483.217	1.15328				1272.84
Mean						0.427526		1.5675			0.779452	0.259081	319.471					0.633495		1.44729			0.196838	0.565108	0.235905	225.707									1.46886			1.32151			11.9541		264.658	1.02522				1022.7
1s						0.195663		2.06748			0.0582752	0.109527	113.809					0.297008		0.348319			0.116444	0.0925907	0.113782	99.1289									0.625929			0.37894			2.2329		105.479	0.0867908				136.078
Median						0.405		1.17			0.781062	0.273449	321.509					0.563918		1.37804			0.17	0.561051	0.233945	222.533									1.2			1.31724			11.9168		248.138	0.98691				1005.41
Q1						0.28		0.651265			0.738402	0.174937	231.448					0.43375		1.20402			0.115	0.490988	0.144851	150.864									0.888889			1.05896			10.4131		180.057	0.979283				910.048
Q3						0.577		1.72682			0.819713	0.338943	392.115					0.748333		1.58348			0.247975	0.627967	0.311401	280.082									2			1.45876			13.5536		320.399	1.07113				1108.51
For reference list see Supplementary Information; for explanations see Table 1
EPMA - Electron Probe Micro Analyser, LAM ICPMS - Laser Ablation Microprobe Inductively-Coupled Plasma Mass Spectrometry; DI - inclusion in diamond, gt garnet, FMQ - fayalite-magnetite-quartz buffer, Mg# - Mg/(Mg+Fetotal), Jd - jadeite component in clinopyroxene, Ca# - molar Ca/(Ca+Mg+Fetotal+Mn), D - distribution coefficient, Ce/YbN - NMORB-normalised ratio (NMORB of Gale et al., 2013, ref. 31),…
* accepted values are from http://georem.mpch-mainz.gwdg.de/
** data of Phillips et al. published in Stachel (2022, ref. 30) as part of a compilation of DI compositions
*** data in MSc thesis of Siva-Jothy published in Stachel (2022, ref. 30) as part of a compilation of DI compositions
